# Supplementary material
Source: PubMed Central journal article supplement (PMC3514740)
Supplement: neo1411_1087SD1.pdf [file neo1411_1087SD1.pdf]

**Legend:**

**Borders of exons** involved at junction points are indicated before each BLAST alignment.

**Arrows** indicate beginning/ end of BLAST alignments.

**Chromosome** location of each partner gene is indicated.

**Gene descriptions** are provided (Entrez gene, UniProtKB/Swiss-Prot databases).

## Chimeras sequences

### PRKAA1-TTC33

TTGGATCAAAGATATCAGGGAACATGAATGGTTTTAAACAGGACCTTCCAAAATATCTCTTTCCTGAGGATCCATCATATAGTTCAACCATGATTGATGATGAA  
 GCCTTAAAAGAAGTATGTGAAAAGTTTGGAGTGCTCAGAAGAGGAAGTTCTCAGCTGTCTTTACAACAGAAAATCACCAGGATCCTTTGGCAGTTGCCTACCATC  
 TCATAATAGATAACAGGAGAATAATGAATGAAGCCAAAGATTTCTATTTGGCGACAAGCCCACCTGATCTTTTTCTTGATGATCATCACCTGACTCGGCCCA  
 TCCTGAAAGAGTACCATTCTTGGTTGCTGAAACACCAAGGGCACGCCATACCCTTGATGAATTAATCCACAGAAAATCCAAACACCAAGGTGTAAGGAAAGCA  
 AAATGGCATTTAGGAATTAGAAGTCAAAGTCGACCAAATGATATATGGCAGAAGTATGTAGAGCAATCAAACAATGGATTATGAATGGAAGGTTGTAAACC  
 CATATTATTTGCGTGTACGAAGGAAGAATCCTGTGACAAGCACTTACTCCAAAATGAGTCTACAGTTATACCAAGTGGATAGTAGAACTTATCTACTGGATTT  
 CCGTAGTATTGATGAATGGCTTCTTTGGGTGGAAGAGGAAAATGGTGAGAAGTCTCAAAGTCACTTCCCAGCAGTTTGAAGCTGAAGCTGCTGATGAGA  
 AGGATGTAGTTGACAACGATGAAAGAAGTGGCTTCATGCCATTAACCGTAGAAAAGAAATCTTCTTGAACGCTGTGCTGAGAAAAGTAAACAGCTGAAGATGA  
 AGAGCCAGTTTGGCTGAAAATAAAGATATCGGGAGGCAATTCAGAAGTGGGATGAAGCACTACAGTTAACTCTAAATGATGCTACCCTATACGAGATGAAAT  
 CACAGTGCTAATGTCTCTTCATGAAATGTTCCAGCAGTACATGCAGCAGAAAATGCCGTGAGCAAAAATCCACATTCATGGGAGTCTGCAGACTTGGGACGTGC  
 TCACTTGTTTAGGAGAAAATATCTTGCAATTCGAGGTTTCAGTAGCCCTTCAATCTATCCATGACTGAATGGAAGGAGACCTCCTTGGCAGACGCCTTCAGGAA  
 CGCCCGAAAAGT

#### Sanger sequencing (forward and reverse)

|            |     |                                                     |     |
|------------|-----|-----------------------------------------------------|-----|
| EMBOSS_001 | 1   | TTTGGCTGTACGAAGGAAGAATCCTGTGACAAGCACTTACTCCAAAATGA  | 50  |
| Pcr band   | 1   | TTTGGCTGTACGAAGGAAGAATCCTGTGACAAGCACTTACTCCAAAATGA  | 50  |
| EMBOSS_001 | 51  | GTCTACAGTTTATACCAAGTGGATAGTAGAACTTATCTACTGGATTTCCGT | 100 |
| Pcr band   | 51  | GTCTACAGTTTATACCAAGTGGATAGTAGAACTTATCTACTGGATTTCCGT | 100 |
| EMBOSS_001 | 101 | AGTATTGATGAATGGCTTCTTTGGGTGGAAGAGGAAAATGGTGAGAAG    | 150 |
| Pcr band   | 101 | AGTATTGATGAATGGCTTCTTTGGGTGGAAGAGGAAAATGGTGAGAAG    | 150 |
| EMBOSS_001 | 151 | GTCTCAAAGGTCACCTCCAGC                               | 172 |
| Pcr band   | 151 | GTCTCAAAGGTCACCTCCAGC                               | 172 |

#### 5' partner: PRKAA1

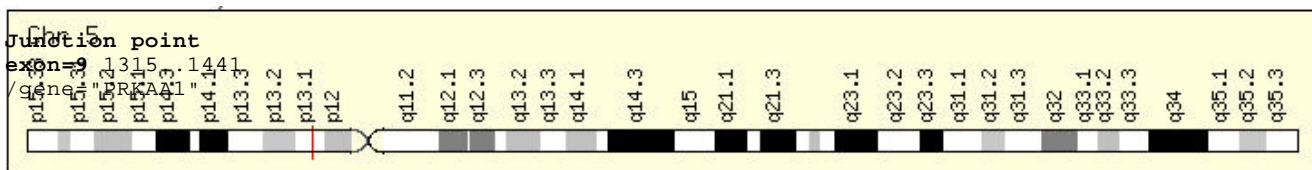

/gene\_synonym="AMPK; AMPK $\alpha$ 1; MGC33776; MGC57364"

#### BLAST vs mRNA

>ref|NM\_006251.5| UniGene info linked to NM\_006251.5GEO profiles info linked to NM\_006251.5Gene info linked to NM\_006251.5Genome view with mapviewer linked to NM\_006251.5 Homo sapiens protein kinase, AMP-activated, alpha 1 catalytic subunit (PRKAA1), transcript variant 1, mRNA

Length=5085

GENE ID: 5562 PRKAA1 | protein kinase, AMP-activated, alpha 1 catalytic subunit [Homo sapiens]

Score = 1162 bits (629), Expect = 0.0

Identities = 629/629 (100%), Gaps = 0/629 (0%)

Strand=Plus/Plus

```

Query 5   ATCAAAGATATCAGGGAAACATGAATGGTTTAAACAGGACCTTCCAAAATATCTCTTTCCT 64
        |||
Sbjct 814  ATCAAAGATATCAGGGAAACATGAATGGTTTAAACAGGACCTTCCAAAATATCTCTTTCCT 873

Query 65  GAGGATCCATCATATAGTTCAACCATGATTGATGATGAAGCCTTAAAAGAAGTATGTGAA 124
        |||
Sbjct 874  GAGGATCCATCATATAGTTCAACCATGATTGATGATGAAGCCTTAAAAGAAGTATGTGAA 933

Query 125  AAGTTTGAGTGCTCAGAAGAGGAAGTTCTCAGCTGTCTTTACAACAGAAATCACCAGGAT 184
        |||
Sbjct 934  AAGTTTGAGTGCTCAGAAGAGGAAGTTCTCAGCTGTCTTTACAACAGAAATCACCAGGAT 993

Query 185  CCTTTGGCAGTTGCCTACCATCTCATAATAGATAACAGGAGAATAATGAATGAAGCCAAA 244
        |||
Sbjct 994  CCTTTGGCAGTTGCCTACCATCTCATAATAGATAACAGGAGAATAATGAATGAAGCCAAA 1053

Query 245  GATTTCTATTTGGCGACAAGCCCACCTGATTCTTTTCTTGATGATCATCACCTGACTCGG 304
        |||
Sbjct 1054  GATTTCTATTTGGCGACAAGCCCACCTGATTCTTTTCTTGATGATCATCACCTGACTCGG 1113

Query 305  CCCCATCCTGAAAGAGTACCATTCTTGGTTGCTGAAACACCAAGGGCAGCCATACCCCTT 364
        |||
Sbjct 1114  CCCCATCCTGAAAGAGTACCATTCTTGGTTGCTGAAACACCAAGGGCAGCCATACCCCTT 1173

Query 365  GATGAATTAATCCACAGAAATCCAAACACCAAGGTGTAAGGAAAGCAAATGGCATTTA 424
        |||
Sbjct 1174  GATGAATTAATCCACAGAAATCCAAACACCAAGGTGTAAGGAAAGCAAATGGCATTTA 1233

Query 425  GGAATTAGAAGTCAAAGTCGACCAAATGATATTATGGCAGAAGTATGTAGAGCAATCAA 484
        |||
Sbjct 1234  GGAATTAGAAGTCAAAGTCGACCAAATGATATTATGGCAGAAGTATGTAGAGCAATCAA 1293

Query 485  CAATTGGATTATGAATGGAAGTTGTAACCCATATTATTGCGGTACGAAGGAAGAAT 544
        |||
Sbjct 1294  CAATTGGATTATGAATGGAAGTTGTAACCCATATTATTGCGGTACGAAGGAAGAAT 1353

Query 545  CCTGTGACAGCATTACTCCAAAATGAGTCTACAGTTATACCAAGTGGATAGTAGAACT 604
        |||
Sbjct 1354  CCTGTGACAGCATTACTCCAAAATGAGTCTACAGTTATACCAAGTGGATAGTAGAACT 1413

Query 605  TATCTACTGGATTTCCGTAGTATTGATGA 633
        |||
Sbjct 1414  TATCTACTGGATTTCCGTAGTATTGATGA 1442
  
```

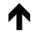

#### PRKAA1 interaction network.

Protein kinase, AMP-activated, alpha 1 catalytic sub-unit (AMPK1). Major interactions are with AMP, p53, AKT, mTOR, TGFB1 and cell cycle regulatory proteins.

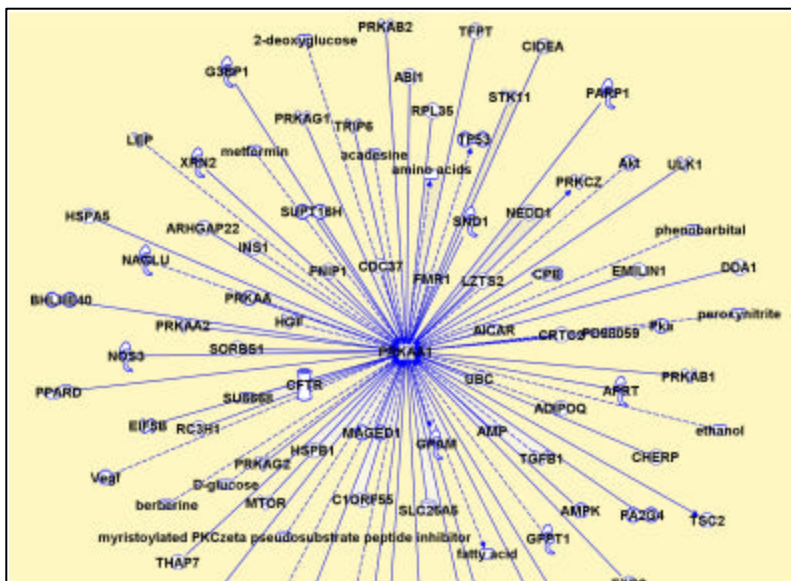

#### Summary for PRKAA1

PKA belongs to Ser/Thr protein kinases. It is the catalytic subunit of the cAMP-activated protein kinase (AMPK). AMPK is a cellular energy sensor conserved in all eukaryotic cells. The kinase activity of AMPK is activated by the stimuli that increase cell AMP/ATP ratio. AMPK regulates key metabolic enzymes through phosphorylation. It protects cells from stress that causes ATP depletion by switching-off ATP-consuming biosynthetic pathways. PKA regulates fatty acid synthesis by phosphorylation of acetyl-CoA carboxylase. It also regulates cholesterol synthesis via phosphorylation and inactivation of hormone-sensitive lipase and hydroxymethylglutaryl-CoA reductase.

## 3' partner: TTC33

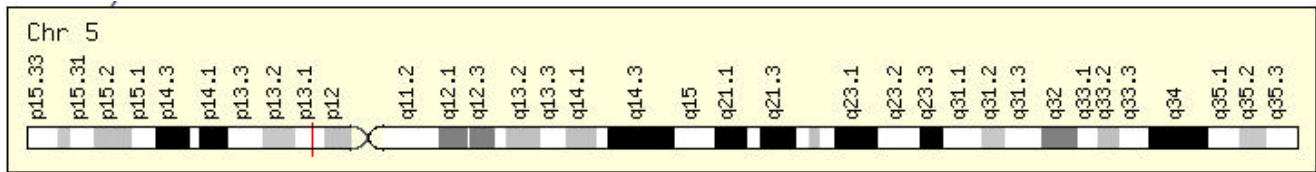

## Junction point

**exon=2** 148..369  
 /gene="TTC33"  
 /gene\_synonym="OSRF"

## BLAST vs mRNA

>ref|NM\_012382.2| UniGene info linked to NM\_012382.2GEO profiles info linked to NM\_012382.2Gene info linked to NM\_012382.2Genome view with mapviewer linked to NM\_012382.2 Homo sapiens tetratricopeptide repeat domain 33 (TTC33), mRNA  
 Length=5519  
 GENE ID: 23548 TTC33 | tetratricopeptide repeat domain 33 [Homo sapiens]  
 Score = 741 bits (401), Expect = 0.0  
 Identities = 492/530 (93%), Gaps = 30/530 (5%)

Strand=Plus/Plus

↓

|       |     |                                                              |     |
|-------|-----|--------------------------------------------------------------|-----|
| Query | 632 | GAATGGCTTCCTTTGGGTGGAAGAGGAAAATTGGTGAGAAGGTCTCAAAGGTCACCTCCC | 691 |
|       |     |                                                              |     |
| Sbjct | 147 | GAATGGCTTCCTTTGGGTGGAAGAGGAAAATTGGTGAGAAGGTCTCAAAGGTCACCTCCC | 206 |
| Query | 692 | AGCAGTTTGAAGCTGAAGCTGCTGATGAGAAGGATGTAGTTGACAACGATGAA-AGAACT | 750 |
|       |     |                                                              |     |
| Sbjct | 207 | AGCAGTTTGAAGCTGAAGCTGCTGATGAGAAGGATGTAGTTGACAACGATGAAGGGAAC  | 266 |
| Query | 751 | GGCTTCATGCCATTAACGTA-GAAAGAAATCTTCTTGAACGCTGTGCTGAGAAAAGTA   | 809 |
|       |     |                                                              |     |
| Sbjct | 267 | GGCTTCATGCCATTAACGTAAGGAAAAGAAATCTTCTTGAAGGCTGTGCTGAGAAAAGTA | 326 |
| Query | 810 | AACAGCTGAA-GATGAA-GAGCCAGTTTGGCTGAAAATAAAAGATATCGGGAGGCAATTC | 867 |
|       |     |                                                              |     |
| Sbjct | 327 | AACAGCTGAAGGATGAAGGAGCCAGTTTGGCTGAAAATAAAAGATATCGGGAGGCAATTC | 386 |
| Query | 868 | AGAAGTGGGATGAAGCACTACAGTAACTCTAAATGATGCTACCCTATACGAGATGAAAT  | 927 |
|       |     |                                                              |     |
| Sbjct | 387 | AGAAGTGGGATGAAGCACTACAGTAACTCCAATGATGCTACCCTATACGAGATGAAAT   | 446 |
| Query | 928 | CACAG-TGCTAATGTCTCTTCATGAAATGTCCAGCAGTACATGCAGCAGAAATG-CCG   | 985 |
|       |     |                                                              |     |
| Sbjct | 447 | CACAGTGCTAATGTCTCTTCATGAAATGTCCAGCAGTACATGCAGCAGAAATGCGCCG   | 506 |

## TTC33 interaction network.

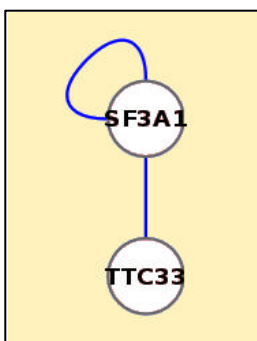

## Summary for TTC33

Tetratricopeptide repeat protein 33. Size: 262 amino acids; 29411 Da Secondary accessions: B2R6G0 O95105.



```

Query 305 AGCATGCACAGCATCGGGCCACAGAGCGAAGGAGACTACCTAGGTGGAGAAGCGTACTGG 364
          |||
Sbjct 1242 AGCATGCACAGCATCGGGCCACAGAGCGAAGGAGACTACCTAGGTGGAGAAGCGTACTGG 1301

Query 365 GCCGGCGGCCTGCACCTCTACACCCATTACCTTTCCGGCCAGGCCAGGGTGGCTTTGGA 424
          |||
Sbjct 1302 GCCGGCGGCCTGCACCTCTACACCCATTACCTTTCCGGCCAGGCCAGGGTGGCTTTGGA 1361

Query 425 GAACTTTTCCGAACACACTTCTTTCTCAACGCAGGAAACCTCTGCAACCTCAACTATGGG 484
          |||
Sbjct 1362 GAACTTTTCCGAACACACTTCTTTCTCAACGCAGGAAACCTCTGCAACCTCAACTATGGG 1421

Query 485 GAGGGCCCCAAAGCTCATATTCGTAAGCTGGCTGAGTGCATCCGCTGGTTCGTACGGGGCC 544
          |||
Sbjct 1422 GAGGGCCCCAAAGCTCATATTCGTAAGCTGGCTGAGTGCATCCGCTGGTTCGTACGGGGCC 1481

Query 545 GGGATTGTCTCAGGCTTGGCAACATCGCTCGGTTGGAACCTAATTACTGCGTCCCCATG 604
          |||
Sbjct 1482 GGGATTGTCTCAGGCTTGGCAACATCGCTCGGTTGGAACCTAATTACTGCGTCCCCATG 1541

Query 605 GGAGTACAGACAGGTGACAG 624
          |||
Sbjct 1542 GGAGTACAGACAGGTGACAG 1561

```

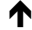

### SAMM50 interaction network.

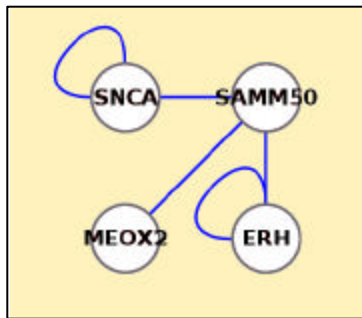

#### Summary for SAMM50

SAMM50 is a component of the sorting and assembly machinery (SAM) complex of the outer mitochondrial membrane. The SAM complex has a role in integrating beta-barrel proteins into the outer mitochondrial membrane.

### 3' partner: PARVB

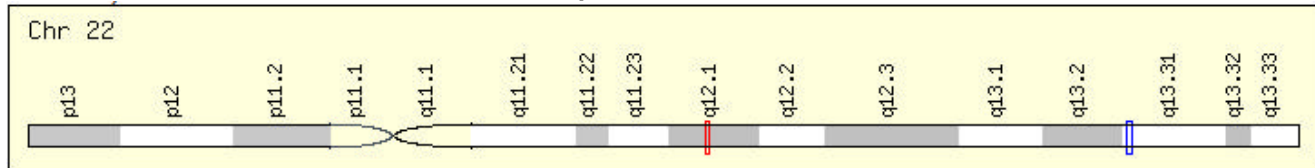

#### Junction point

exon=4 260..349

/gene="PARVB"

/gene\_synonym="CGI-56"

#### BLAST vs mRNA

>ref|NM\_001003828.1| UniGene info linked to NM\_001003828.1GEO profiles info linked to NM\_001003828.1Gene info linked to NM\_001003828.1Genome view with mapviewer linked to NM\_001003828.1  
Homo sapiens parvin, beta (PARVB), transcript variant 1, mRNA  
Length=1808

GENE ID: 29780 PARVB | parvin, beta [Homo sapiens]

Score = 684 bits (370), Expect = 0.0

Identities = 471/514 (92%), Gaps = 30/514 (5%)

Strand=Plus/Plus

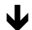

```

Query 623 AGTGAGTGACCTGCAGGAAGAAGGCAAGAATGCCATCAACTCACCAGATGCCCGGCCCT 682
          |||
Sbjct 258 AGTGAGTGACCTGCAGGAAGAAGGCAAGAATGCCATCAACTCACCAGATGCCCGGCCCT 317

Query 683 GCGGATGTTTACCCTGAAGACACCCAGCTCGAGGAGAACGAGGAGCGCACGATGATTGA 742
          |||
Sbjct 318 GGTGGATGTTTACCCTGAAGACACCCAGCTTGAAGAGAACGAGGAGCGCACGATGATTGA 377

```

```

Query 743  CCCCACTTCC-ACGAAGACCCCAAGTTCAAGGAAGTGGTCAAGGTCTCTCTCGACTGGAT 801
          |||
Sbjct 378  CCCCACTTCCAAGGAAGACCCCAAGTTCAAGGAAGTGGTCAAGGTCTCTCTCGACTGGAT 437

Query 802  TAATGACGTGCTGGTGGAGGAGAGGATCATTGTGAAGCAGCTGGAGGAAGACCTGTATGA 861
          |||
Sbjct 438  TAATGACGTGCTGGTGGAGGAGAGGATCATTGTGAAGCAGCTGGAGGAAGACCTGTATGA 497

Query 862  CGGCCAGGTGCTGCAGAAATCTTTGGAAAACTGGCAAGGTGCAAGCTGAATGTGGCTGA 921
          |||
Sbjct 498  CGGCCAGGTGCTGCAGAACTCTTTGGAAAACTGGCAGGGTGAAGCTGAATGTGGCTGA 557
    
```

**PARVB interaction network.**

Beta parvin is involved in integrin linked kinase signaling. It directly interacts with ILK, ACTIN, ALPHA ACTININ and other proteins.

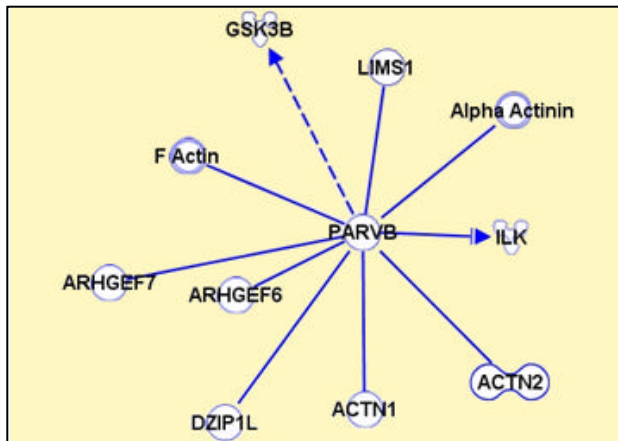

**Summary for PARVB**

Members of the parvin family, including PARVB, are actin-binding proteins associated with focal contacts. It probably has a role in the regulation of cell adhesion and cytoskeleton organization.

**URB1-C21orf45**

ATAGCCGGCTCTGTGGGGCTGAGGGGCTGGCAGGGCCTGTGCAGGAGGTGGCCTGCCTGTTCAATACGGTCATGCTGCAGCTGGTGGCTGCCAGGGCCGGGAGGGAGCCCTTTCCACCCGGCCATGGAAGCCCTCTCCCTGTCTTCTCTGAGTGAGAAGGATGAAGCCACACAAGGTGTTTCCTGTAATGTTTCTGTGGATAAGAACAGACTATCCAAACGTGAAAAGGAAAATGGTTGCGTCCTTGAGACTTTGTGCTGCGCGGGGTGCTCACTCAATCTTGGCTACGTGTACAGATGCAGCCCAAGAATCTTGATTACAAGAGAGACTTGTTTTGCCTCAGTGTGGAAGCCATTGAAAGTTATGTTTTAGGGTCTCTGAAAAGCAAATGTGTGTCAGAAGATAAGAGCTTTTAAATCTTGAAAGCAGAGTTGAAATAGAAAAGTTTCTAACACAGATGGAAGATGTCTTGAAAGCATTACAAATGAAGCTGTGGGAGGCCGAATCAAATGTCCTTTCCACTTGTAAGCTGAAGCTGAAGCTGAGTCTGTGTCCTCCATTCTGCCCCGCCCTTCTCCCTTATTTGTTAAATGAAGCAACATAGTGAGCGTCGTCTCTAC

**Sanger sequencing (forward and reverse)**

```

EMBOSS_001      1  GCCCTCTCCCTGTCTTCTCTGAGTGAGAAGGATGAAGCCACACAAGGTGT      50
          |||
PCR band        1  GCCCTCTCCCTGTCTTCTCTGAGTGAGAAGGATGAAGCCACACAAGGTGT      50

EMBOSS_001     51  TTCCTGTAATGTTTCTGTGGATAAGGAACAGAAGCTATCCAAACGTGAAA     100
          |||
PCR band       21  TTCCTGT-ATGTTTCTGTGGATAAGGAACAGAAGCTATCCAAACGTGAAA     100

EMBOSS_001    101  AGGAAAATGGTTGCGTCCTTGAG-      123
          |||
PCR band      101  AGGAAAATGGTTGCGTCCTTGAGA      123
    
```

**5' partner: URB1**

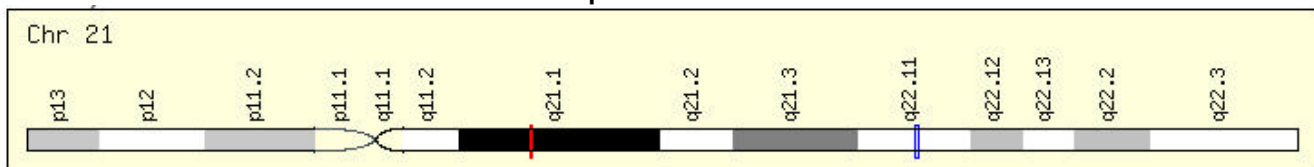

**Junction point****exon=38** 6128..6727

/gene="URB1"

/gene\_synonym="C21orf108; KIAA0539; NPA1"

**BLAST vs mRNA**

>ref|NM\_014825.2| UniGene info linked to NM\_014825.2GEO profiles info linked to NM\_014825.2Gene info linked to NM\_014825.2Genome view with mapviewer linked to NM\_014825.2Download subject sequence NM\_014825 spanning the HSP Homo sapiens URB1 ribosome biogenesis 1 homolog (S. cerevisiae) (URB1), mRNA  
 Length=10808  
 GENE ID: 9875 URB1 | URB1 ribosome biogenesis 1 homolog (S. cerevisiae) [Homo sapiens]  
 Score = 322 bits (174), Expect = 7e-87  
 Identities = 176/177 (99%), Gaps = 0/177 (0%)

Strand=Plus/Plus

```

Query 1   ATAGCCGGCTCTGTGGGGCTGAGGGGCTGGCAGGGCCTGTGCAGGAGGTGGCCTGCCTGT 60
          |||
Sbjct 6551 ATAGCCGGCTCTGTGGGGCTGAGGGGCTGGCAGGGCCTGTGCAGGAGGTGGCCTGCCTGT 6610

Query 61   TCAATACGTCATGCTGCAGCTGGTGGCTGCCAGGGCCGGGCAGGGAGCCCTTCCACC 120
          |||
Sbjct 6611 TCAATACGTCATGCTGCAGCTGGTGGCTGCCAGGGCCGGGCAGGGAGCCCTTCCACC 6670

Query 121  CGGCCATGGAAGCCCTCTCCCTGTCTTCTCTGAGTGAGAAGGATGAAGCCACACAAG 177
          |||
Sbjct 6671 CGGCCATGGAAGCCCTCTCCCTGTCTTCTCTGAGTGAGAAGGATGAAGCCACACAAG 6727
  
```

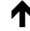**URB1 interaction network.**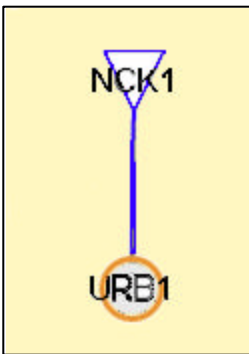**Summary for URB1**

Nucleolar pre-ribosomal-associated protein 1.  
 Subcellular location: Nucleus, nucleolus. Secondary  
 accessions: Q96NX1 Q9NYQ1.

**3' partner: C21orf45**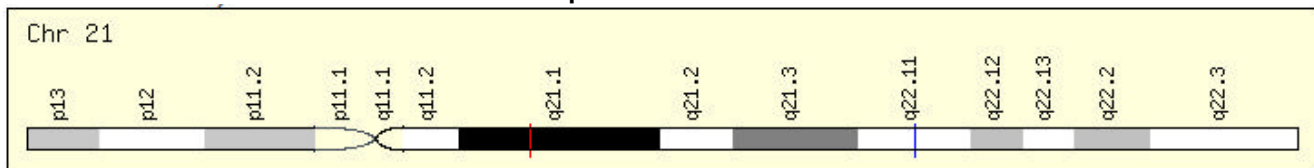**Junction point****exon=2** 386..452

/gene="MIS18A"

/gene\_synonym="B28; C21orf45; C21orf46; FASP1; hMis18alpha; MIS18alpha"

**BLAST vs mRNA**

>ref|NM\_018944.2| UniGene info linked to NM\_018944.2GEO profiles info linked to NM\_018944.2Gene info linked to NM\_018944.2Genome view with mapviewer linked to NM\_018944.2 Homo sapiens MIS18 kinetochore protein homolog A (S. pombe) (MIS18A), mRNA  
 Length=1587  
 GENE ID: 54069 MIS18A | MIS18 kinetochore protein homolog A (S. pombe) [Homo sapiens]  
 Score = 826 bits (447), Expect = 0.0  
 Identities = 451/453 (99%), Gaps = 0/453 (0%)

Strand=Plus/Plus

```

      ↓
Query  178  GTGTTTCCTGTAATGTTTCTGTGGATAAGGAACAGAAGCTATCCAAACGTGAAAAGGAAA  237
Sbjct  386  GTGTTTCCTGTAATGTTTCTGTGGATAAGGAACAGAAGCTATCCAAACGTGAAAAGGAAA  445

Query  238  ATGGTTGCGTCCTTGAGACTTTGTGCTGCGCGGGGTGCTCACTCAATCTTGGCTACGTGT  297
Sbjct  446  ATGGTTGCGTCCTTGAGACTTTGTGCTGCGCGGGGTGCTCACTCAATCTTGGCTACGTGT  505

Query  298  ACAGATGCACGCCCAAGAATCTTGATTACAAGAGAGACTTGTGCTCAGTGTGAAG  357
Sbjct  506  ACAGATGCACGCCCAAGAATCTTGATTACAAGAGAGACTTGTGCTCAGTGTGAAG  565

Query  358  CCATTGAAAGTTATGTTTTAGGGTCTCTGAAAAGCAAATGTGTCAGAAGATAAAGAGC  417
Sbjct  566  CCATTGAAAGTTATGTTTTAGGGTCTCTGAAAAGCAAATGTGTCAGAAGATAAAGAGC  625

Query  418  TTTTAACTCTGAAAGCAGAGTTGAAATAGAAAAGTTTCTAACACAGATGGAAGATGTCT  477
Sbjct  626  TTTTAACTCTGAAAGCAGAGTTGAAATAGAAAAGTTTCTAACACAGATGGAAGATGTCT  685

Query  478  TGAAAGCATTACAAATGAAGCTGTGGGAGGCCGAATCCAAATGTCCTTTCCCACTTGTA  537
Sbjct  686  TGAAAGCATTACAAATGAAGCTGTGGGAGGCCGAATCCAAATGTCCTTTCCCACTTGTA  745

Query  538  AAAGCTGAACTCTAGTCTGTGCTCCTCATTCTGCCCCGCCCTTCCCTCCCTTATTGTT  597
Sbjct  746  AAAGCTGAACTCTAGTCTGTGCTCCTCATTCTGCCCCGCCCTTCCCTCCCTTATTGTT  805

Query  598  AAATGAAGCAACATAGTGAGACGTCGTCTCTAC  630
Sbjct  806  AAATGAAGCAACATAGTGAGACGTCGTCTCTAC  838
    
```

**C21ORF45 interaction network.**

It indirectly interacts with p53.

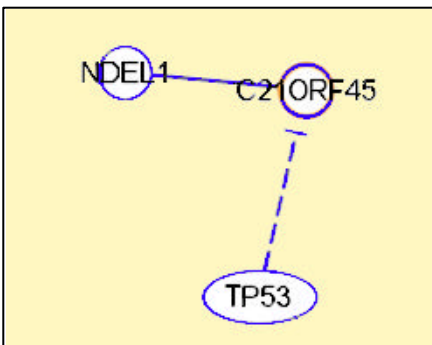

**Summary for C21ORF45**

MS18A\_HUMAN, Q9NYP9. Protein Mis18-alpha. Subunit: Homodimer, and heterodimer with MIS18B. Identified in a complex containing MIS18A, MIS18B, MIS18BP1, RBBP7 and RBBP4. Subcellular location: nucleus. It associates with centromeres in interphase cells, from late anaphase to G1 phase. It is not detected on centromeres during earlier phases of mitosis and is associated with chromatin.

**CTBS-GNG5**

TGAATCTGTCTGAGGATCATGTTTGTACCATGCAAAAAGTCCCTTTCCGGGGGGCTCCTTGTAGTGACGCTGCAGGACGTGAGGTGCCCTACAAAACGATCA' GAAGCAAATAAATAGTTCTATTTCTGGAAACCTATGGGATAAAGATCAGCGGGCTCCTTATTATAACTATAAAAGTTTCCAGGCAGCTGCAGACTTGAACA( TTCTGTCTGCAGAATGCTCAACATGACCCTCTGCTGACTGGAGTATCTTCAAGTACAAATCCCTTCAGACCCAGAAAGTCTGTTCCCTTTTGTAGTAAAA( AATCTTTCAAAGTTTCCCAAACCACTCCTTATGATCCAGTGAATATCAAGAGAGCTACATTTGAAGCCTGTACAAAAGCTTATCCCTGTAACACATGTGC( ATAATATACAAACTTTTACTTTTCGTCAGTCCTTAACATCTACCTCTCTGAATTTTCATGAATTTCTATTTTCAAGGGTAATTGTTTTATATACACTGGCAG( AGCATAACAATAAACTTAGTATGAAACTTT

**Sanger sequencing (forward and reverse)**

```

EMBOSS_001      1  -CCTACAAAACGATCATGAAGCAAATAAATAGTTCTATTTCTGGAAACCT      49
                | | | | | | | | | | | | | | | | | | | | | | | | | | | |
PCR band        1  TCCTACAAAACGATCATGAAGCAAATAAATAGTTCTATTTCTGGAAACCT      50

EMBOSS_001     50  ATGGGATAAAGATCAGCGGGCTCCTTATTATAACTATAAAGTTTCCAGG      99
                | | | | | | | | | | | | | | | | | | | | | |
PCR band        51  ATGGGATAAAGATCAGCGGGCTCCTTATTATAACTATAAAGTTTCCAGG     100

EMBOSS_001    100  CAGCTGCAGACTTGAACAGTTCTGTCTGCAGAATGCTCAACATGACC     147
                | | | | | | | | | | | | | | | | | | | | | |
PCR band       101  CAGCTGCAGACTTGAACAGTTCTGTCTGCAGAATGCTCAACATGACC     148
    
```



## 5' partner: CTBS

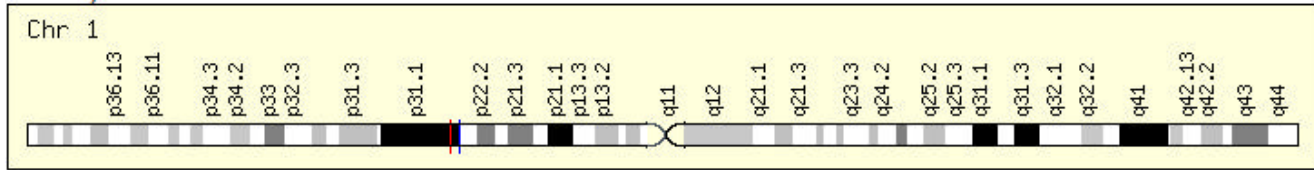

**Junction point**  
**exon=6** 861..1022  
 /gene="CTBS"  
 /gene\_synonym="CTB"

**BLAST vs mRNA**

```
>ref|NM_004388.2| UniGene info linked to NM_004388.2GEO profiles info linked to NM_004388.2Gene info
linked to NM_004388.2Genome view with mapviewer linked to NM_004388.2 Homo sapiens chitobiase, di-N-
acetyl- (CTBS), mRNA
Length=3152
GENE ID: 1486 CTBS | chitobiase, di-N-acetyl- [Homo sapiens]
Score = 327 bits (177), Expect = 1e-88
Identities = 177/177 (100%), Gaps = 0/177 (0%)
```

Strand=Plus/Plus

```
Query 1 TGAATCTGTCTGAGGATCATGTTTGTACCATTGCAAAAAGTCCCTTTCCGGGGGGCTCCTT 60
|||||
Sbjct 847 TGAATCTGTCTGAGGATCATGTTTGTACCATTGCAAAAAGTCCCTTTCCGGGGGGCTCCTT 906

Query 61 GTAGTGACGCTGCAGGACGTCAGGTGCCCTACAAAACGATCATGAAGCAAATAAATAGTT 120
|||||
Sbjct 907 GTAGTGACGCTGCAGGACGTCAGGTGCCCTACAAAACGATCATGAAGCAAATAAATAGTT 966

Query 121 CTATTTCTGGAAACCTATGGGATAAAGATCAGCGGGCTCCTTATTATAACTATAAAG 177
|||||
Sbjct 967 CTATTTCTGGAAACCTATGGGATAAAGATCAGCGGGCTCCTTATTATAACTATAAAG 1023
```

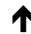**CTBS interaction network.**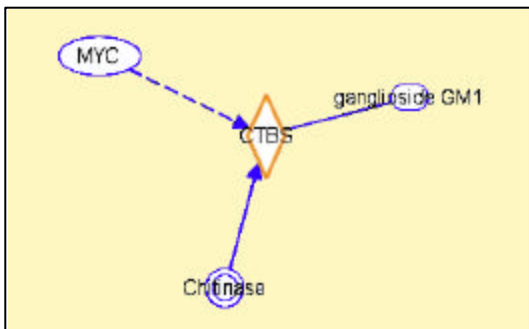**Summary for CTBS**

Chitobiase is a lysosomal glycosidase involved in degradation of asparagine-linked oligosaccharides on glycoproteins. It is also involved in hydrolyzation of N acetyl-beta-D-glucosamine (1-4)N-acetylglucosamine chitobiose from the reducing end of the bond. This requires prior cleavage by glycosyl-asparaginase.

## 3' partner: GNG5

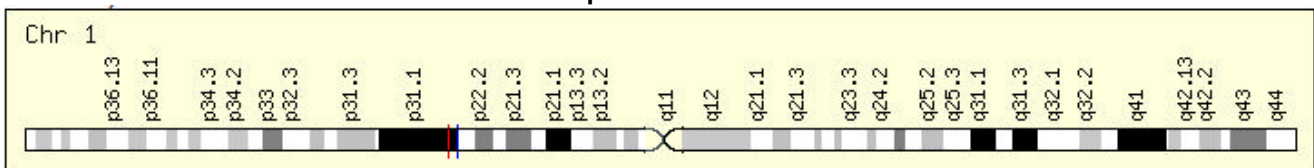

**Junction point**  
**exon=3** 436..580  
 /gene="GNG5"  
 /gene\_synonym="FLJ92393"

**BLAST vs mRNA**

```
>ref|NM_005274.2| UniGene info linked to NM_005274.2GEO profiles info linked to NM_005274.2Gene info
linked to NM_005274.2Genome view with mapviewer linked to NM_005274.2 Homo sapiens guanine nucleotide
binding protein (G protein), gamma 5 (GNG5), mRNA
Length=823
```

GENE ID: 2787 GNG5 | guanine nucleotide binding protein (G protein), gamma 5 [Homo sapiens]  
 Score = 682 bits (369), Expect = 0.0  
 Identities = 371/372 (99%), Gaps = 0/372 (0%)

Strand=Plus/Plus

```

      ↓
Query  174  AAAGTTTCCCAGGCAGCTGCAGACTTGAACAGTTCTGTCTGCAGAATGCTCAACATGAC  233
          |||
Sbjct  433  AAAGTTTCCCAGGCAGCTGCAGACTTGAACAGTTCTGTCTGCAGAATGCTCAACATGAC  492

Query  234  CCTCTGCTGACTGGAGTATCTTCAAGTACAAATCCCTTCAGACCCAGAAAGTCTGTTCC  293
          |||
Sbjct  493  CCTCTGCTGACTGGAGTATCTTCAAGTACAAATCCCTTCAGACCCAGAAAGTCTGTTCC  552

Query  294  TTTTTGTAGTAAAAATGAATCTTTCAAAGGTTTCCCAAACCACTCCTTATGATCCAGTGAA  353
          |||
Sbjct  553  TTTTTGTAGTAAAAATGAATCTTTCAAAGGTTTCCCAAACCACTCCTTATGATCCAGTGAA  612

Query  354  TATTCAAGAGAGCTACATTTGAAGCCTGTACAAAAGCTTATCCCTGTAACACATGTGCCA  413
          |||
Sbjct  613  TATTCAAGAGAGCTACATTTGAAGCCTGTACAAAAGCTTATCCCTGTAACACATGTGCCA  672

Query  414  TAATATACAAACTTTTACTTTTCGTCAGTCCTTAACATCTACCTCTCTGAATTTTCATGAA  473
          |||
Sbjct  673  TAATATACAAACTTCTACTTTTCGTCAGTCCTTAACATCTACCTCTCTGAATTTTCATGAA  732

Query  474  TTTCTATTTTCAACAAGGGTAATTGTTTTATATACACTGGCAGCAGCATAACAATAAACTTA  533
          |||
Sbjct  733  TTTCTATTTTCAACAAGGGTAATTGTTTTATATACACTGGCAGCAGCATAACAATAAACTTA  792

Query  534  GTATGAAACTTT  545
          |||
Sbjct  793  GTATGAAACTTT  804
    
```

**GNG5 interaction network.**

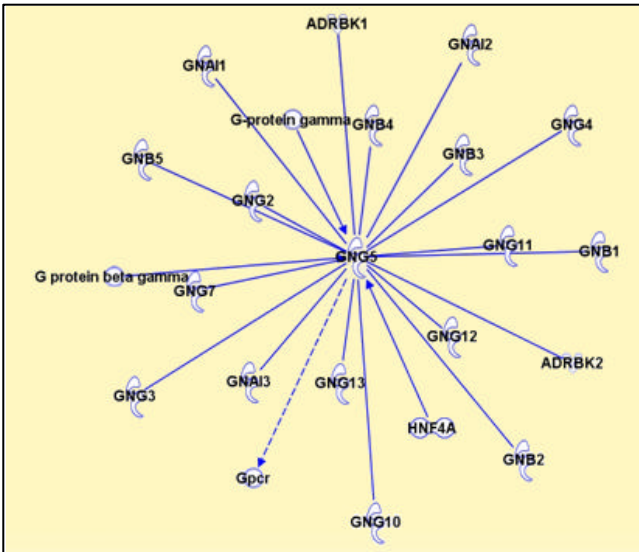

**Summary for GNG5**

G proteins are trimeric proteins that regulate flow of information from cell surface receptors to internal metabolic effectors. Interactions of a G protein with its activated receptor promotes exchange of GTP for GDP (alpha subunit). The alpha-GTP complex dissociates from the beta-gamma heterodimer so as to interact with and regulate effector molecules. G proteins are involved as modulators or transducers in transmembrane signaling systems. The beta and gamma chains are required for the GTPase activity, for replacement of GDP by GTP, and for G protein-effector interactions.

**CHD2- CHMP1A**

CTACTAGTAGATAGGACTCTTGGTTTGGACATACTACATGGATCAGTAAATACCTGGGCACAGGACTTCAAAGCAAACACAGATTCCCCCTCCCCCTTAATA'  
 TTAAGAAT'AAAAAGATGATGAGAAATAAGGACAAAAGCCAAGAGGAGGACAGTTTCGCTACACAGCAATGCATCGAGGTGACCAAGAATATGGCCCAGGTGAC'  
 AAAGCCCTGGACAAGGCCCTGAGCACCATTGGACCTGCAGAAGGTCTCCTCAGTGATGGACAGGTTTCGAGCAGCAGGTGCAGAACCTGGACGTCCATACATCG'  
 TGATGGAGGACTCCAAGCTCGGCCACCACCTGACCACGCCGAGGAGGACAGCCTCATCATGCAGATCGCCGAGGAGAATGGCCTGGAGGTGC'  
 GGACCAGCTCAGCCAGCTGCCCGAGGGCGCCTCTGCCGTGGGCGAGAGCTCTGTGXXXXXXXXXXXXXXXXXXXXXXXXXXXXXXXXTTGGCCGCTTGAGGAA'  
 TAGCCGTGCCCGCCCGTGTGCACCGCCTCTGCCCGTGTGTGCTGGAAGGCTCCTGTCTCTCCCAACCGCTCTTGCTTTGTGCTGACCCCGCGGGGC'  
 GCGGCCGCGAGCCACTCTGCGTCTCTCACCTGCCAGGCCTGCGTGGCCTTAGGGTTGTTCTCTTTTAGGTTGGGCGGTGGGTCTGTGTCTTGGTGTG'  
 GTTCTGCAAAATTTCTGGGGGTGATTTCTGTGACTCTGGGCCACAGCGGGGAGGCCAAGAAGGGCCCTGTGACTTTTACCCAGCACTGTGGGGCCCTTCA'  
 ACTCTGGGCGAGCAGACATGCTGCTTCCCATCAGCAGAGGGGGTTCAGGCCTGCCCTGTGCCAAACAACCTTGTAGGCCTCTCCGCACCAACTCATCGGGC'  
 GGAGGTCTCACCCATGTTGGACGACATAGCCCTAGGAGGACACCACAGGTCTAGTGTGGCTTGGGGGATGTGAGGTCACTAAGCGTCTTGGGTGATTCAAT'  
 ACATCCTTCTTCTCAAATTACTTTCAAGG

## Sanger sequencing (forward and reverse)

|            |     |                                                        |     |
|------------|-----|--------------------------------------------------------|-----|
| EMBOSS_001 | 51  | TACCTGGGCACAGGACTTCAAAGCAAACACAGATTCCCCCTCCCCTTAA      | 100 |
| PCR band   | 1   | <br>ATTCCCCCTCCCCTTAA                                  | 18  |
| EMBOSS_001 | 101 | TATTTAAGAATTAAAAGATGATGAGAAATAAGGACAAAAGCCAAGAGGAG     | 150 |
| PCR band   | 19  | <br>TATTTAAGAATTAAAAGATGATGAGAAATAAGGACAAAAGCCAAGAGGAG | 68  |
| EMBOSS_001 | 151 | GACAGTTCGCTACACAGCAATGCATCGAGGTGACCAAGAATATGGCCCAG     | 200 |
| PCR band   | 69  | <br>GACAGTTCGCTACACAGCAATGCATCGAGGTGACCAAGAATATGGCCCAG | 118 |
| EMBOSS_001 | 201 | GTGACCAAAGCCCTGGACAAGGCCCTGAGCACCATGGACCTGCAGAAGGT     | 250 |
| PCR band   | 119 | <br>GTGACCAAAGCCCTGGACAAGGCCCTGAGCACCATGGACCTGCAGAAGGT | 168 |
| EMBOSS_001 | 251 | CTCCTCAGTGATGGACAGGTTTCGAGCAGCAGGTGCAGAACCTGGACGTCC    | 300 |
| PCR band   | 169 | <br>CTCCTCAGTGATGGACAGGTTTCGAGCA                       | 195 |

## 5' partner: CHD2

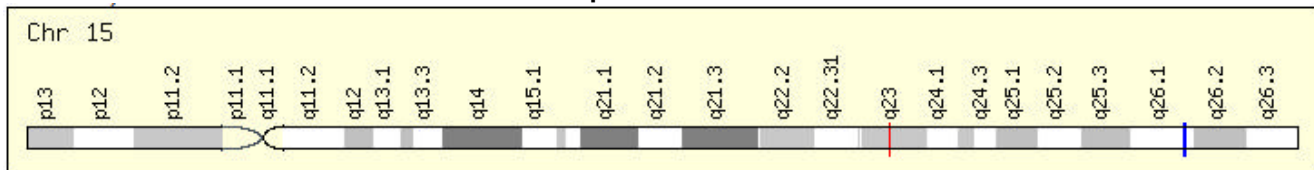

## Junction point

exon=2 505..637

/gene="CHD2"

/gene\_synonym="DKFZp547I1315; DKFZp686E01200;

DKFZp781D1727; FLJ38614"

## BLAST vs mRNA

&gt;ref|NM\_001271.3| Homo sapiens chromodomain helicase DNA binding protein 2 (CHD2),

transcript variant 1, mRNA

Length=9374

GENE ID: 1106 CHD2| chromodomain helicase DNA binding protein 2 [Homo sapiens]

Score = 324 bits (358), Expect = 3e-91

Identities = 179/179 (100%), Gaps = 0/179 (0%)

Strand=Plus/Plus

|       |     |                                                                  |     |
|-------|-----|------------------------------------------------------------------|-----|
| Query | 1   | CTACTAGTAGATAGGACTCTTGGTTTGGACATACTACATGGATCAGTAAATACCTGGGCA     | 60  |
| Sbjct | 459 | <br>CTACTAGTAGATAGGACTCTTGGTTTGGACATACTACATGGATCAGTAAATACCTGGGCA | 518 |
| Query | 61  | CAGGACTTCAAAGCAAACACAGATTCCCCCTCCCCTTAATATTTAAGAATTAAAAGATG      | 120 |
| Sbjct | 519 | <br>CAGGACTTCAAAGCAAACACAGATTCCCCCTCCCCTTAATATTTAAGAATTAAAAGATG  | 578 |
| Query | 121 | ATGAGAAATAAGGACAAAAGCCAAGAGGAGGACAGTTCGCTACACAGCAATGCATCGAG      | 179 |
| Sbjct | 579 | <br>ATGAGAAATAAGGACAAAAGCCAAGAGGAGGACAGTTCGCTACACAGCAATGCATCGAG  | 637 |

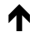

**CHD2 interaction network.**

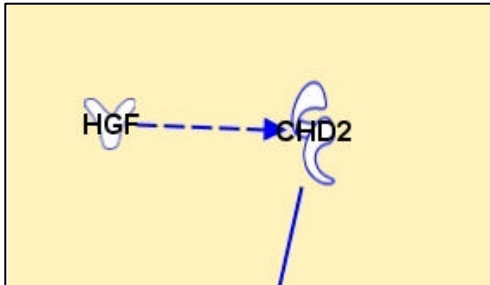

**Summary for CHD2**

The CHD family of proteins is characterized by the presence of chromo (chromatin organization modifier) and SNF2-related helicase/ATPase domains. CHD domains modify gene expression by altering chromatin structure and access of the transcriptional apparatus to target DNA sites. HGF regulates cell growth, and cell motility and modulates CHD2 activity.

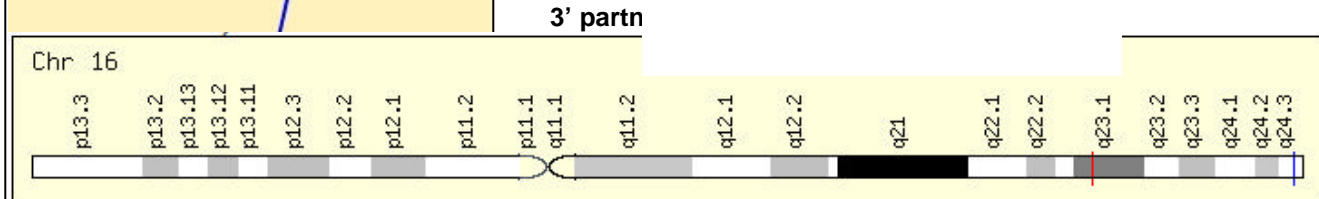

**Junction point**

exon=5 366..494  
 /gene="CHMP1A"  
 /gene\_synonym="CHMP1; KIAA0047; PCOLN3; PRSM1"

**BLAST vs mRNA**

```
>ref|NM_001083314.1| Homo sapiens chromatin modifying protein 1A (CHMP1A), transcript
variant 1, mRNA
Length=2353
GENE ID: 5119 CHMP1A| chromatin modifying protein 1A [Homo sapiens]
Score = 1292 bits (1432), Expect = 0.0
Identities = 814/878 (92%), Gaps = 14/878 (1%)
```

Strand=Plus/Plus

↓

```
Query 179 GGTGACCAAGAATATGGCCAGGTGACCAAAGCCCTGGACAAGGCCCTGAGCACCATGGA 238
          |||
Sbjct 365 GGTGACCAAGAATATGGCCAGGTGACCAAAGCCCTGGACAAGGCCCTGAGCACCATGGA 424

Query 239 CCTGCAGAAGGTCTCCTCAGTGATGGACAGGTTTCGAGCAGCAGGTGCAGAACCTGGACGT 298
          |||
Sbjct 425 CCTGCAGAAGGTCTCCTCAGTGATGGACAGGTTTCGAGCAGCAGGTGCAGAACCTGGACGT 484

Query 299 CCATACATCGGTGATGGAGGACTCCATGAGCTCGGCCACCCCTGACCACGCCGAGGA 358
          |||
Sbjct 485 CCATACATCGGTGATGGAGGACTCCATGAGCTCGGCCACCCCTGACCACGCCGAGGA 544

Query 359 GCAGGTGGACAGCCTCATCATGCAGATCGCCGAGGAGAATGGCCTGGAGGTGCTGGACCA 418
          |||
Sbjct 545 GCAGGTGGACAGCCTCATCATGCAGATCGCCGAGGAGAATGGCCTGGAGGTGCTGGACCA 604

Query 419 GCTCAGCCAGCTGCCCGAGGGGCGCCTCTGCCGTGGGCGAGAGCTCTGTnnnnnnnnnnnn 478
          |||
Sbjct 605 GCTCAGCCAGCTGCCCGAGGGGCGCCTCTGCCGTGGGCGAGAGCTCTGTGCGCAGCCAGGA 664

Query 479 nnnnnnnnnnnnnnnnnnnnnnnTGGCCGCCTTGAGGAACCTAGCCGTGCCCGCCGGTGTGCA 538
          |||
Sbjct 665 GGACCAGTGTACCGAGGTTGGCCGCCTTGAGGAACCTAGCCGTGCCCGCCGGTGTGCA 724

Query 539 CCGCCTCTGCCCGGTGATGTGCTGGAAGGCTCCTGTCTCTCCCCACCGCGTCTTGCCCTT 598
          |||
Sbjct 725 CCGCCTCTGCCCGGTGATGTGCTGGAAGGCTCCTGTCTCTCCCCACCGCGTCTTGCCCTT 784

Query 599 TGTGCTGACCCCGCGGGGCTGCGGCCGCGCAGCCACTCTGCGTCTCTCACCTGCCAGGCT 658
          |||
Sbjct 785 TGTGCTGACCCCGCGGGGCTGCGGCCGCGCAGCCACTCTGCGTCTCTCACCTGCCAGGCT 844

Query 659 GCGTGGCCCTTAGGGTTGTTCCCTGTTCTTTTAGGTTGGGCGGTGGGTCTGTCTCTGCTGT 718
          |||
Sbjct 845 GCGTGGCCCTTAGGGTTGTTCCCTGTTCTTTTAGGTTGGGCGGTGGGTCTGTCTCTGCTGT 904

Query 719 TGAGTTTCTGCAAAATTTCTGGGGGTGATTTCTGTGACTCTGGGCCACAGCGGGGAGGCC 778
          |||
Sbjct 905 TGAGTTTCTGCAAAATTTCTGGGGGTGATTTCTGTGACTCTGGGCCACAGCGGGGAGGCC 964

Query 779 AAGAAGGGCCCTGTGGACTTTCACCCAGCACTGTGGGGCCCTTCAGACTCTGGGGCAGCA 838
          |||
Sbjct 965 AAGAAGGGCCCTGTGGACTTTCACCCAGCACTGTGGGGCCCTTCAGACTCTGGGGCAGCA 1024

Query 839 GACATGCTGCTCCCATCAG-CAGAGGGGTCAGGCCTGCCCTGTTGCCAAACAACCTCCT 897
          |||
```

```

Sbjct 1025 GACATGCTGCTTCCCATCAGCCAGAGGGGGTCCAGGGCTGCCCTGTTGCCAAACAACCTCCC 1084
Query 898 TGAGGCCTCTCCGCACCAACTCATCGGGCAGGAGGTCTCACCCATGTTGGAC-GACATAG 956
Sbjct 1085 TGAGGCCTCTCCGCACCAACTCAGCGGGCAGGAGGTCCCA-CCATG-TGGACAGACATAG 1142
Query 957 CCCTAGGAGGACACCACAGGTCTAGTGTGGCTTGGGGGATGTCAGGT--CACTAAGC--- 1011
Sbjct 1143 CCCAAGGAGG-CACCACAGGTCTA-TGTGTGCTGGGGGATGTCAGGTGCCACCCAACGCT 1200
Query 1012 GTTCTGGGTGATT--CAATGACATCCTTCTCTTCA 1047
Sbjct 1201 GTCTGGTGGTATTACAATGACATCC-TCCTCCTCCA 1237

```

### CHMP1A interaction network.

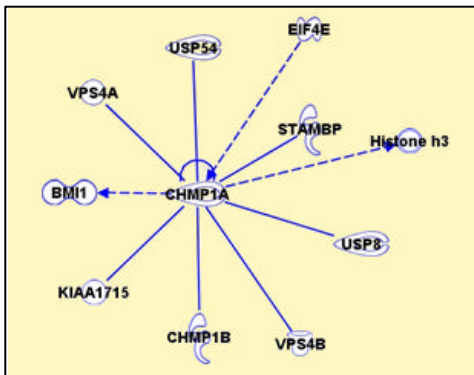

### Summary for CHMP1A

CHMP1A a member of the CHMP/Chmp family. CHMP1A is a component of endosomal sorting transport complex III (ESCRT-III) which is involved in multivesicular bodies (MVBs) formation and sorting of endosomal cargo proteins into MVBs. The MVB pathway appears to require the sequential function of ESCRT-O, -I, -II and -III complexes. ESCRT-III proteins mostly dissociate from the invaginating membrane before the ILV is released. The ESCRT machinery also functions in topologically equivalent membrane fission events, such as the terminal stages of cytokinesis and the budding of enveloped viruses (HIV -1). Involved in recruiting VPS4A and/or VPS4B to the midbody of dividing cells. May also be involved in chromosome condensation. Targets the Polycomb group (PcG) protein BMI1/PCGF4 to regions of condensed chromatin.

### P2RX5-TAX1BP3

```

TTGGCTCACATCTGGGCCAGGGGCTGCTGGGGATGCCGGAGCAGCAGGAGCTGCAGGAGCCACCCGAGGCGAAGCGTGGAAGCAGCAGTCAGAAGGGGAACGG;
TCTGTGTGCCACAGCTCCTGGAGCCCCACAGCAAAGAGTTGAAATTCACAAGCTGCGTCAAGGTGAGAACTTAATCCTGGGTTTCAGCATTGGAGGTGGAA;
CGACCAGGATCCTTCCAGAAATCCTTCTCTGAAGACAAGACGGACAAGGGTATTTATGTCACACGGGTGTCTGAAGGAGGCCCTGCTGAAATCGCTGGGCT;
CAGATTGGAGACAAGATCATGCAGGTGAACGGCTGGGACATGACCATGGTCACACACGACCAGGCCCGCAAGCGGCTCACCAAGCGCTCGGAGGAGGTGGTG;
GTCTGCTGGTGACGCGGCAGTCGCTGCAGAAGGCCGTCAGCAGTCCATGCTGTCTAGCAGCCACCACCATCTGCGACTCCTGCCTGCCCTCTCTGTAC;
GTAACGCCACTTCCACACTCTGTCTCCCATCTGGCTTCTGCTGACCGCTGGGCCAGCTCAGAAGGGCTATAGCTGGTCCCAGAGGCCCTGGCCTGGCCTTCC;
TCCCTTCTCCCATCCCTGGCCTGGGGCCTCTGGGACCGGCTTCTCTCTGACACCGAGGATTGGAATAAAGGCCCTGGAGCTGAGTAGTACCCAGTCT;
CTGTGACCACAGGCTCACGTCCGACCCTGCTGCTTGGCCACAGCAGTGGCTGGGGCAAGTGGGAACCACTACCTCTTGGGGACCCCAAAAGCCTGGGAAA

```

### Sanger sequencing (reverse)

```

EMBOSS_001      2  GTCAGAAGGGGAACGGATCTGTGTGCCACAGCTCCTGGAGCCCCACAGC      51
PCR band        2  GTCAGAAGGGGAACGGATCTGTGTGCCACAGCTCCTGGAGCCCCACAGC      51
EMBOSS_001     52  AAAGAGTTGAAATTCACAAGCTGCGTCAAGGTGAGAACTTAATCCTGGGT     101
PCR band        52  AAAGAGTTGAAATTCACAAGCTGCGTCAAGGTGAGAACTTAATCCTGGGT     101
EMBOSS_001     102  TTCAGCATTGGAGGTGGAAT      151
PCR band        102  TTCAGCATTGGAGGTGGAAT      151

```

### 5' partner: P2RX5

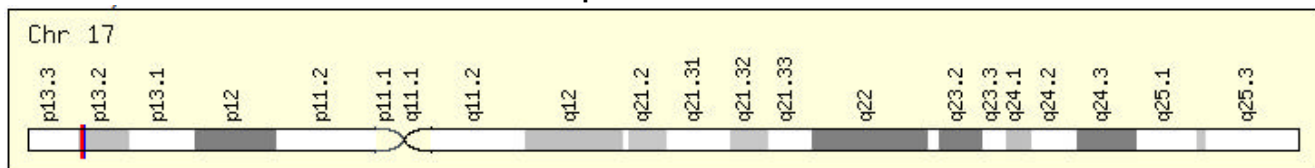

### Junction point

exon=11 1392..1586

/gene="P2RX5"

/gene\_synonym="LRH-1; MGC47755; P2X5; P2X5R"

**BLAST vs mRNA**

>ref|NM\_001204520.1| Gene info linked to NM\_001204520.1 Homo sapiens purinergic receptor P2X, ligand-gated ion channel, 5 (P2RX5), transcript variant 5, mRNA  
 Length=2269  
 GENE ID: 5026 P2RX5 | purinergic receptor P2X, ligand-gated ion channel, 5 [Homo sapiens]  
 Score = 244 bits (132), Expect = 2e-63  
 Identities = 132/132 (100%), Gaps = 0/132 (0%)

Strand=Plus/Plus

```

Query 4      GCTCACATCTGGGCCAGGGCTGCTGGGGATGCCGGAGCAGCAGGAGCTGCAGGAGCCACC 63
             |||
Sbjct 1455   GCTCACATCTGGGCCAGGGCTGCTGGGGATGCCGGAGCAGCAGGAGCTGCAGGAGCCACC 1514

Query 64     CGAGGCGAAGCGTGAAGCAGCAGTCAGAAGGGGAACGGATCTGTGTGCCACAGCTCCT 123
             |||
Sbjct 1515   CGAGGCGAAGCGTGAAGCAGCAGTCAGAAGGGGAACGGATCTGTGTGCCACAGCTCCT 1574

Query 124    GGAGCCCCACAG 135
             |||
Sbjct 1575   GGAGCCCCACAG 1586
    
```

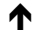

**3' partner: TAX1BP3**

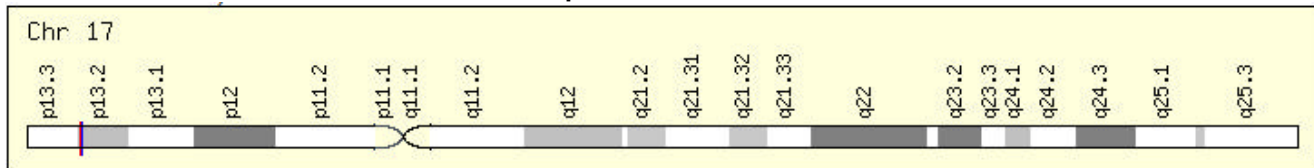

**Junction point**

exon=2 193..312  
 /gene="TAX1BP3"  
 /gene\_synonym="TIP-1"

**BLAST vs mRNA**

>ref|NM\_014604.3| Gene info linked to NM\_014604.3 Homo sapiens Tax1 (human T-cell leukemia virus type I) binding protein 3 (TAX1BP3), transcript variant 1, mRNA  
 Length=1398  
 GENE ID: 30851 TAX1BP3 | Tax1 (human T-cell leukemia virus type I) binding protein 3 [Homo sapiens]  
 Score = 1218 bits (659), Expect = 0.0  
 Identities = 680/689 (99%), Gaps = 6/689 (0%)

Strand=Plus/Plus

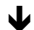

```

Query 135   GCAAAGAGTTGAAATTCACAAGCTGCGTCAAGGTGAGAACTTAATCCTGGGTTTCAGCAT 194
             |||
Sbjct 192   GCAAAGAGTTGAAATTCACAAGCTGCGTCAAGGTGAGAACTTAATCCTGGGTTTCAGCAT 251

Query 195   TGGAGGTGGAATCGACCAGGATCCTTCCCAGAAATCCCTTCTCTGAAGACAAGACGGACAA 254
             |||
Sbjct 252   TGGAGGTGGAATCGACCAGGATCCTTCCCAGAAATCCCTTCTCTGAAGACAAGACGGACAA 311

Query 255   GGGTATTATGTACACACGGGTGCTGAAGGAGGCCCTGTGAAATCGCTGGGTGCAGAT 314
             |||
Sbjct 312   GGGTATTATGTACACACGGGTGCTGAAGGAGGCCCTGTGAAATCGCTGGGTGCAGAT 371

Query 315   TGGAGACAAGATCATGCAGGTGAACGGCTGGGACATGACCATGGTCACACACGACCCAGGC 374
             |||
Sbjct 372   TGGAGACAAGATCATGCAGGTGAACGGCTGGGACATGACCATGGTCACACACGACCCAGGC 431

Query 375   CCGCAAGCGGCTACCAAGCGCTCGGAGGAGGTGGTGCCTCTGCTGGTGACGGCAGTC 434
             |||
Sbjct 432   CCGCAAGCGGCTACCAAGCGCTCGGAGGAGGTGGTGCCTCTGCTGGTGACGGCAGTC 491

Query 435   GCTGCAGAAGGCCGTGCAGCAGTCCATGCTGTCTAGCAGCCACCACCATCTGCGACTCC 494
             |||
Sbjct 492   GCTGCAGAAGGCCGTGCAGCAGTCCATGCTGTCTAGCAGCCACCACCATCTGCGACTCC 551

Query 495   TGCTTGCCGCCCTCTCTGTACAGTAACGCCACTTCCACACTCTGTGCCCATCTGGCTTCTG 554
             |||
Sbjct 552   TGCTTGCCGCCCTCTCTGTACAGTAACGCCACTTCCACACTCTGTGCCCATCTGGCTTCTG 611

Query 555   CTGACCCTGGGCCCCAGCTCAGAAGGGCTATAGCTGGTCCCAGAGGCTGGCCTGGCCT 614
             |||
Sbjct 612   CTGACCCTGGGCCCCAGCTCAGAAGGGCTATAGCTGGTCCCAGAGGCTGGCCTGGCCT 671
    
```

### NXPH1-TXNL4A

```

TTGGCAACTGTGCCAAGCCTTGGCTCCCGCGAACCAATCCTGAGCGCGACCCGGGCACTGGGACGGCGACTCCGCCAAAGCTGGACGAGGCAGCCGGACCCG'
CTGCGCTCGAGCATGGAGACGGAGCGCCTGGGAGGGCAGCTCCGGGGCGCTGGAGACGCCAGGCCGAGTAGCTTCTCCATGGAGCCTGCCAGAGCGGTCC(
TTCTCGCAGGATTCCGCCAAGTCCTGTGCGGCTGCTGAGAGCGCTCCTTGCTCTGTAAAGTGGATGTCAGGTGGATCTATGTTTCTGAAGGAACAAAGACT(
AAAGAAGGCACCGCCAAAGGAAGTTTGTAGACGCGGGAGAATGCAGGCTGCGTGTGTACGTGCTTTTCTCCTGCAGCCCACCGTCTACTTGGTTAAAAATT'
TGCAGTTATTTATCTTGTGGATATTACAGAAGTGCCTGACTTCAACAAAATGTATGAGTTATACGATCCATGTAAGTGTATGTTTCTTTCAGGAACAAGCA(
ATCATGATTGACTTGGGACTGGCAACAACAAGATTAAGTGGGCCATGGAGGACAAGCAGGAGATGGTGGACATCATCGAGACGGTGTACCGCGGGGCC(
GCAAAGGCCCGCGCCTGGTGGTGTCCCCCAAGGACTACTCCACCAAGTACCGCTACTGAGGCGCCCTCAGTCTGCGCGGATAAATGTCTGTGGAGACCTTTTT(
TATAGAACATATTTAAGCTATTTAAAGCCTTTGGAATACAGGAAGCTCCCGGGCTGG
    
```

#### 5' partner: NXPH1

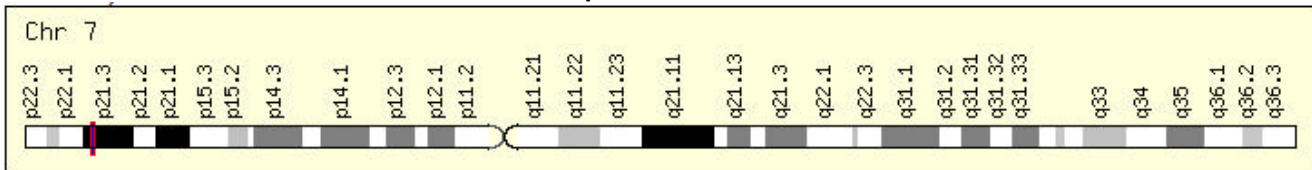

#### Junction point

```

exon=2 802..965
/gene="NXPH1"
/gene_synonym="Nbla00697; NPH1"
    
```

#### BLAST vs mRNA

```

>ref|NM_152745.2| UniGene infoGeoGene info Homo sapiens neurexophilin 1 (NXPH1), mRNA
Length=2931
GENE ID: 30010 NXPH1 | neurexophilin 1 [Homo sapiens]
Score = 720 bits (798), Expect = 0.0
Identities = 399/399 (100%), Gaps = 0/399 (0%)
    
```

Strand=Plus/Plus

```

Query 5 CAACTGTGCCAAGCCTTGGCTCCCGCGAACCAATCCTGAGCGCGACCCGGGCACTGGGAC 64
      |||
Sbjct 569 CAACTGTGCCAAGCCTTGGCTCCCGCGAACCAATCCTGAGCGCGACCCGGGCACTGGGAC 628

Query 65 GCGACTCCGCCAAAGCTGGACGAGGCAGCCGGACCCGCTGCGCTCGAGCATGGAGACG 124
      |||
Sbjct 629 GCGACTCCGCCAAAGCTGGACGAGGCAGCCGGACCCGCTGCGCTCGAGCATGGAGACG 688

Query 125 GAGCGCCTGGGAGGGCACGTCGGGGCGCTGGAGACGCCAGGCCCGAGTAGCTTCTCCAT 184
      |||
Sbjct 689 GAGCGCCTGGGAGGGCACGTCGGGGCGCTGGAGACGCCAGGCCCGAGTAGCTTCTCCAT 748

Query 185 GGAGCCTGCCAGAGCGGTCCCTTCTCGCAGGATTCCGCCCAAGTCCTGTGCGGCTGCTG 244
      |||
Sbjct 749 GGAGCCTGCCAGAGCGGTCCCTTCTCGCAGGATTCCGCCCAAGTCCTGTGCGGCTGCTG 808

Query 245 AGAGCGCTCCTTGCTCTGTAAAGTGGATGTCAGGTGGATCTATGTTTCTGAAGGAACAAA 304
      |||
Sbjct 809 AGAGCGCTCCTTGCTCTGTAAAGTGGATGTCAGGTGGATCTATGTTTCTGAAGGAACAAA 868

Query 305 GACTCAAAGAAGGCACCGCCAAAGGAAGTTTGTAGACGCGGGAGAATGCAGGCTGCGTGTG 364
      |||
Sbjct 869 GACTCAAAGAAGGCACCGCCAAAGGAAGTTTGTAGACGCGGGAGAATGCAGGCTGCGTGTG 928

Query 365 GTACGTGCTTTTCTCCTGCAGCCCACCGTCTACTTGGT 403
      |||
Sbjct 929 GTACGTGCTTTTCTCCTGCAGCCCACCGTCTACTTGGT 967
    
```

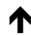

#### 3' partner: TXNL4A

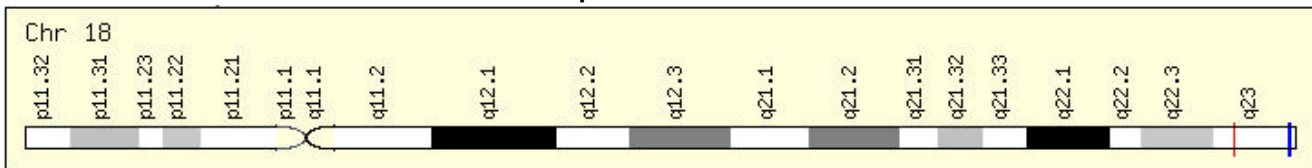

#### Junction point

```

exon=2 294..397
    
```

/gene="TXNL4A"  
 /gene\_synonym="DIB1; DIM1; HsT161; TXNL4; U5-15kD"

**BLAST vs mRNA**

>ref|NM\_006701.2| Homo sapiens thioredoxin-like 4A (TXNL4A), mRNA  
 Length=1415  
 Score = 654 bits (724), Expect = 0.0  
 Identities = 375/381 (98%), Gaps = 2/381 (0%)

Strand=Plus/Plus

↓

```

Query 401  GGTAAAAAATTTGCAGTTATTTATCTTGTGGATATTACAGAAGTGCCTGACTTCAACAA 460
          |||
Sbjct 293  GGTAAAAAATTTGCAGTTATTTATCTTGTGGATATTACAGAAGTGCCTGACTTCAACAA 352

Query 461  AATGTATGAGTTATACGATCCATGTACTGTTCATGTTTTTCTTCAGGAACAAGCACATCAT 520
          |||
Sbjct 353  AATGTATGAGTTATACGATCCATGTACTGTTCATGTTTTTCTTCAGGAACAAGCACATCAT 412

Query 521  GATTGACTTGGGGACTGGCAACAACAAGATTAAGTGGGCCATGGAGGACAAGCAGGA 580
          |||
Sbjct 413  GATTGACTTGGGGACTGGCAACAACAAGATTAAGTGGGCCATGGAGGACAAGCAGGA 472

Query 581  GATGGTGGACATCATCGAGACGGGTGTACCGCGGGGCCCGCAAAGGCCGCGGCTGGTGGT 640
          |||
Sbjct 473  GATGGTGGACATCATCGAGACGGGTGTACCGCGGGGCCCGCAAAGGCCGCGGCTGGTGGT 532

Query 641  GTCCCCCAAGGACTACTCCACCAAGTACCGCTACTGAGGCGCCCTCAGTCTGCGCGGATA 700
          |||
Sbjct 533  GTCCCCCAAGGACTACTCCACCAAGTACCGCTACTGAGGCGCCCTCAGTCTGCGCGGATA 592

Query 701  AATGTCGTGGAGACCTTTTGTATAGAAACATATTTAAGCTATTTAAAGCCTTTGG-AAA 759
          |||
Sbjct 593  AATGTCGTGGAGCCCTTTTGTATGGAAACGT-TTAAAGCTATTTAAAGCCTTTGGAAAA 651

Query 760  TACAGGAAGCTCCCGGGCTGG 780
          |||
Sbjct 652  TACAGGAAGCTCCAGGGCTGG 672
  
```

**KIAA1704- ITGB3BP**

TTGGCAGTAAGAAAGATGAAGAACATATATTATCAGGAAGAGATAAGAGACTGGCTGAGCAGGTATCTTCATACAATGAATCAAAAAGATCAGAATCTCTTA'  
 GGACATACATCATAAAAAGTTAAAGAGTAAGGCTGCTGAAGACAAAAATAAGCCTCAAGAGAGAATACCATTGACCGTGATAAAGATCTCAAGGTTAATCG'  
 TTTGATGAAGCTCAGAAAAAGCCCTAATAAAAAAATCTAGAGAACTAAACACCAGATTTTCACACGGCAAAGGCAATATGTTTTTATAAATTCATGATGTT'  
 CTATCAAAAGTTGAGAAATGTGAGAAGAAATCATGGAGATAATGCAAAATTTAAGTAGTATACAGGCTTTTGAGGGCAGTAGAGAGCTTGAAAATCTCATT'  
 GAATCTCTGTGCATCXXXXXXXXXXXXXXXXXXXXXXXXXXXXXXXXXXXXXXXXXXXXXGTGAATAAACAAAAACTGTTTGAAAAGAGTACAGGAC'  
 TCCTCACAAAGGTAAGTAGTTGTGTTTTAGTTTATTACATAAAGATGCTTTCATCCATTTTGCCAATTAATAACTAATCATCATGAATCCTTTTTAGTGGTT'  
 TCTTTTTCTCAGAGATCCCTGTCTGAAGTATGTTCTTTTAGAAGATCACAAATCTCATTGAAAAGCTTTATATTGCATTTAGCAGAAGATGATATCTG'  
 TGAGATCAACTTCTCTGATGATTGAACTTTTTAAATGTCTTTTGAATGCAATCTCAACATAAGATTTGAATTTTGTCTTTTATTAATAATTTCTTTTGA'  
 AATACAAATAGGACACAATGCATTAATATACTGCAGTTTTTGTAGTGTGCAC TAGAAGCATTGAAAGTTACTTTCTAAGTATTTCTGGAAACTTTTCAG'  
 TCATTAATATGCTTTTCTACTATGACTCTTATGTCTGAGCATTTCACAGTATGGAAAACTAAATAACAGTTTTAGTTCCATAGAAGTACACATCACACC'  
 TCACACCTCATAGCAAGTATCATGACTGTAAATACCAACCTTAAACTAATAAGGAGGATAAAGTACTACGATTGCCATAGCATCTGCATGAATAGGCTTAA'  
 GGGTGGGCGGTTTCAGCGCTAACACTTTTAT

**5' partner: KIAA1704**

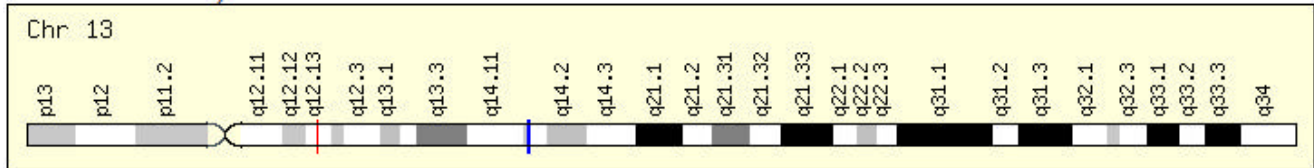

**Junction point**

CDS 104..1126  
 /gene="KIAA1704"  
 /gene\_synonym="AD029; bA245H20.2; LSR7; RP11-245H20.2"

**BLAST vs mRNA**

>ref|NM\_018559.2| Homo sapiens KIAA1704 (KIAA1704), mRNA  
 Length=1431  
 Score = 527 bits (584), Expect = 2e-153  
 Identities = 292/292 (100%), Gaps = 0/292 (0%)

Strand=Plus/Plus



```

Query 5      CAGTAAGAAAGATGAAGAACATATATTATCAGGAAGAGATAAGAGACTGGCTGAGCAGGT 64
            |||
Sbjct 835    CAGTAAGAAAGATGAAGAACATATATTATCAGGAAGAGATAAGAGACTGGCTGAGCAGGT 894

Query 65     ATCTTCATACAATGAATCAAAAAGATCAGAATCTCTTATGGACATACATCAAAAAAGTT 124
            |||
Sbjct 895    ATCTTCATACAATGAATCAAAAAGATCAGAATCTCTTATGGACATACATCAAAAAAGTT 954

Query 125    AAAGAGTAAGGCTGCTGAAGACAAAAATAAGCCTCAAGAGAGAATACCATTGACCGTGA 184
            |||
Sbjct 955    AAAGAGTAAGGCTGCTGAAGACAAAAATAAGCCTCAAGAGAGAATACCATTGACCGTGA 1014

Query 185    TAAAGATCTCAAGGTTAATCGGTTTGATGAAGCTCAGAAAAAGCCCTAATAAAAAAATC 244
            |||
Sbjct 1015   TAAAGATCTCAAGGTTAATCGGTTTGATGAAGCTCAGAAAAAGCCCTAATAAAAAAATC 1074

Query 245    TAGAGAACTAAACACCAGATTTTCACACGGCAAAGGCAATATGTTTTTATAA 296
            |||
Sbjct 1075   TAGAGAACTAAACACCAGATTTTCACACGGCAAAGGCAATATGTTTTTATAA 1126
    
```

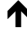

3' partner: ITGB3BP

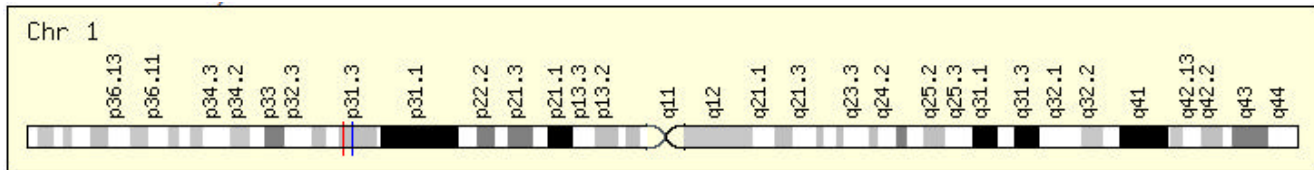

Junction point

```

exon=5 286..364
/gene="ITGB3BP"
/gene_synonym="CENP-R; CENPR; HSU37139; NRIF3; TAP20"
    
```

BLAST vs mRNA

```

>ref|NM_014288.3| Homo sapiens integrin beta 3 binding protein (beta3-endonexin) (ITGB3BP), mRNA
Length=892
Score = 241 bits (266), Expect = 3e-67
Identities = 135/136 (99%), Gaps = 0/136 (0%)

Strand=Plus/Plus
    
```

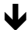

```

Query 293  ATAAATTCATGATGTTGCTATCAAAAAGTTGAGAAAATTGTCAGAGAAGAAATCATGGAGATAA 352
            |||
Sbjct 282  ATGAATTCATGATGTTGCTATCAAAAAGTTGAGAAAATTGTCAGAGAAGAAATCATGGAGATAA 341

Query 353  TGCAAAATTTAAGTAGTATACAGGCTTTGGAGGGCAGTAGAGAGCTTGAAAATCTCATTG 412
            |||
Sbjct 342  TGCAAAATTTAAGTAGTATACAGGCTTTGGAGGGCAGTAGAGAGCTTGAAAATCTCATTG 401

Query 413  GAATCTCCTGTGCATC 428
            |||
Sbjct 402  GAATCTCCTGTGCATC 417
    
```

DHX8 -ADK

```

TTGGCTGTAGCCATGGCGGGAGCCTTAATCGGGTCGGAGCCAGGCCCGCGGAAGAACTTGCCAAACTCGAGTACCTGTCTTTGGTGTCAAAGGTTTGCAC
AGCTGGACAATCACTTGGGGATCAACGACAAGGACCTTGCTGAATTTGTGATCAGTCTTGCTGAGAAAAATACCACCTTGATACTTTAAGGCTTCTCTCG
CAAAAATGGTGCAGAAATTTACGGATTCTCTTATTAGTAACTTGTCTGCGTCTCATACAAACCATGCGGCCTCCAGCGAAGCCTTCCACTAGCAAAGGTTTCT
TCTCAACTGGTCTCTGACAAGCCTCTGACTGAATGTATCCGTGCTGGCCACTATGCAGCAAGCATATAATTAGACGGACTGGCTGCACCTTTCCCTGAGAAG
CAGACTTCCACTGATGGAAGAGCTGAAAACACAAGCCCAGGAGTGCAGACACTGCCCTAATTGCTTCTGAGAATTTCCCATATTAATAAAGAAGAAAATTA
TGCCATTTTTCCTACTATAATAATGCTGAATCTTAATTTAGAGGGTACAAGGGTATGGTAATGCTGTAGAATCTTTATATCTCAACAATCTAAAAAATG
TGTTTATTTCCATAGTTTGATAGTGCCACTTAAATGCCAATTAACAAGAATATAACATTTCAATAGAAATTTTATTTTCATTTCAATTACTTTGTATACA
TTCTGCTTTGAATGCAGATGCAAATTTAATAATAATAGATTTTTAATGAATTAATCTTAACATAGTAATCTTTAGCTTTTATACAAATATATTAATTTA
GAGTATATGTGTGCTATACACACACATACATAAATATACCACATATACACTGATAGTCAAATAGGGTACAGAAATTTTATCTTGTCAATATGCCAATTATC
CTTTAATGTGCACCTCAACATGTAAATAACTTTGGATATTTAAAAAACACCATCACGCCAATAG
    
```

## 5' partner: DHX8

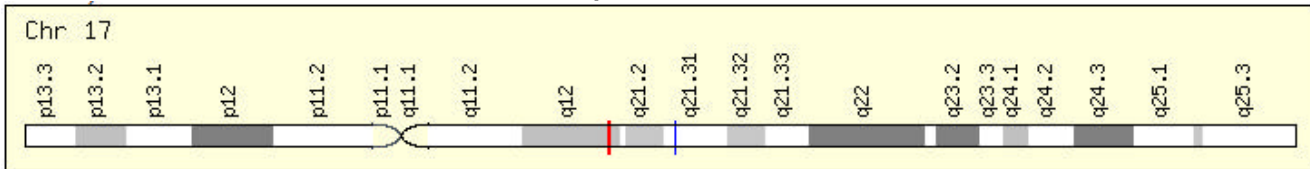

## Junction point

exon=3 308..380

/gene="DHX8"

/gene\_synonym="DDX8; HRH1; PRP22; PRPF22"

## BLAST vs mRNA

>ref|NM\_004941.1| Homo sapiens DEAH (Asp-Glu-Ala-His) box polypeptide 8 (DHX8), mRNA

Length=4201

Gene id: 4826690 ATP-dependent RNA helicase DHX8

Score = 542 bits (600), Expect = 2e-157

Identities = 300/300 (100%), Gaps = 0/300 (0%)

Strand=Plus/Plus

```

Query 2   TGGCTGTAGCCATGGCGGGAGCCTTAATCGGGTCGGAGCCAGGCCCCCGGAAGAACTTG 61
          |||
Sbjct 81   TGGCTGTAGCCATGGCGGGAGCCTTAATCGGGTCGGAGCCAGGCCCCCGGAAGAACTTG 140

Query 62   CCAAACCTCGAGTACCTGTCTTTGGTGTCAAAGGTTTGCACTGAGCTGGACAATCACTTGG 121
          |||
Sbjct 141  CCAAACCTCGAGTACCTGTCTTTGGTGTCAAAGGTTTGCACTGAGCTGGACAATCACTTGG 200

Query 122  GGATCAACGACAAGGACCTTGCTGAATTTGTGATCAGTCTTGCTGAGAAAAATACCACCT 181
          |||
Sbjct 201  GGATCAACGACAAGGACCTTGCTGAATTTGTGATCAGTCTTGCTGAGAAAAATACCACCT 260

Query 182  TTGATACTTTTAAGGCTTCTCTCGTCAAAAATGGTGCAGAAATTTACGGATTCTCTTATTA 241
          |||
Sbjct 261  TTGATACTTTTAAGGCTTCTCTCGTCAAAAATGGTGCAGAAATTTACGGATTCTCTTATTA 320

Query 242  GTAACCTTGCTGCGTCTCATACAAACCATGCGGCCTCCAGCGAAGCCTTCCACTAGCAAAG 301
          |||
Sbjct 321  GTAACCTTGCTGCGTCTCATACAAACCATGCGGCCTCCAGCGAAGCCTTCCACTAGCAAAG 380

```

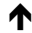

## 3' partner: ADK

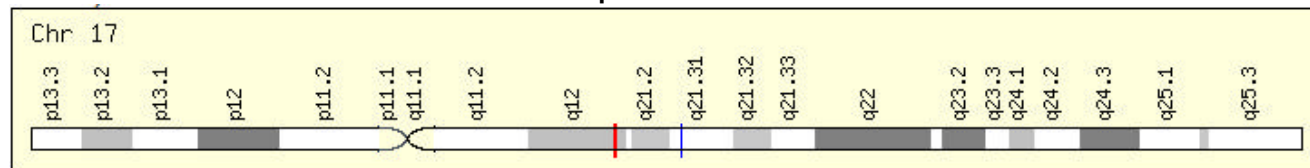

## Junction point

exon=12 1037..2018

/gene="ADK"

/gene\_synonym="AK"

## BLAST vs mRNA

>ref|NM\_006721.2| Homo sapiens adenosine kinase (ADK), transcript variant ADK-long, mRNA

Length=2018

GENE ID: 132 ADK| adenosine kinase [Homo sapiens]

Score = 1088 bits (1206), Expect = 0.0

Identities = 667/713 (93%), Gaps = 41/713 (5%)

Strand=Plus/Plus

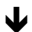

```

Query 300  AGGTTTTCTGTCTCAACTGGTCTCTGACAAGCCTCTGACTGAATGTATCCGTGCTGGCCA 359
          |||
Sbjct 1035  AGGTTTTCTGTCTCAACTGGTCTCTGACAAGCCTCTGACTGAATGTATCCGTGCTGGCCA 1094

Query 360  CTATGCAGCAAGCATCATAATTAGACGGACTGGCTGCACCTTTCTGAGAAGCCAGACTT 419
          |||
Sbjct 1095  CTATGCAGCAAGCATCATAATTAGACGGACTGGCTGCACCTTTCTGAGAAGCCAGACTT 1154

```

```

Query 420  CCACTGATGGAAGAGCTGAAAAACACAAGCCCAGGAGTGCAGACACTGCCCTAATTGCTTC 479
          |||
Sbjct 1155  CCACTGATGGAAGAGCTGAAAAACACAAGCCCAGGAGTGCAGACACTGCCCTAATTGCTTC 1214

Query 480  CTGAGAATTCCCATATTAATAAAGAAGAAAATTATCTGCCATTTTTCTACTATAATAA 539
          |||
Sbjct 1215  CTGAGAATTCCCATATTAATAAAGAAGAAAATTATCTGCCATTTTTCTACTATAATAA 1274

Query 540  TGCTGAATCTTAATTTAGAGGGTACAAGGGTATGGTAATGCTTGTAGAATCTTTATTATC 599
          |||
Sbjct 1275  TGCTGAATCTTAATTTAGAGGGTACAAGGGTATGGTAATGCTTGTAGAATCTTTATTATC 1334

Query 600  TCAACAATCTAAAAATGATGTTTATTTCCATAGTTTGATAGTGCCACTTAAATGCCAAT 659
          |||
Sbjct 1335  TCAACAATCTAAAAATGATGTTTATTTCCATAGTTTGATAGTGCCACTTAAATGCCAAT 1394

Query 660  TAAACAAGAATATAACATTTCAATAGAAAATTTTATTTTCATTTTCAATTACTTTGTA--- 716
          |||
Sbjct 1395  TAAACAAGAATATAACATTTCAATAGAAAATTTTATTTTCATTTTCAATTACTTTGTA--- 1454

Query 717  -----TACATTTCTGCTTTGAATGCAGATGCAA 744
          |||
Sbjct 1455  TCGTGTGATTTAGTACACTGATTTGTTTTTACATTTCTGCTTTGAATGCAGATGCAA 1514

Query 745  ATTTTAATATAATAGATTTTTTAATGAATTAATCTTAACATAGTAATCTTTAGCTTTTTA 804
          |||
Sbjct 1515  --TTAATATAATAGATTTTTTAATGAATTAATCTTAACATAGTAATCTTTAGCTTTTTA 1572

Query 805  TACAAATATATTAATTTAGGAGTATATGTGTGTCTATACACACACATACATAAATATAC 864
          |||
Sbjct 1573  TACAAATATATTAATTTAGGAGTATATGTGTGTCTATACACACACATACATAAATATAC 1632

Query 865  CACATATACA-CTGATAGTCAAATAGGGTACAGAAAATTTTATCTTGTCAA-TATGCC-AA 921
          |||
Sbjct 1633  CACATATACACCTGATAGTCAAATAAGGTACAGAAAATTTTATCTTGTCAAATATGCCAAA 1692

Query 922  TTATCTCTTTAATGTGCACTCCAACATGTAAT-AACTTTGGATATTTAAAAAA 973
          |||
Sbjct 1693  TAATCTCTTTAATGTGCACTCCAACATGTAATAAACTTTGGATAATTTAAATAA 1745
    
```

**PPIL1-KIAA1614**

TTGGCGCTTGCCCTAGACAAGCATTCCGCCGCCGGCTTCGCTATGGCGGCAATCCCCAGATTCTGGCAGCCACCCAACGTTTACTTGAGACCAGCATGG/
AATCATTTGTGCTGGAGCTGTACTGGAAGCATGCTCCAAGACCTGTAAGAACCTTGTGCTGAGTTGGCTCGTAGGTTACTACAATGGCACAAAATCCACAG/
ATTATCAAAGACTTTCATGATCCAAAGGAGGTGCCAACAGGGACAGGAGGACCCAGGGCTTTCTGGCTCAGCAGATGTTGCCACCATCAACTCCAGGGC/
TCACCCTCTCCCTGTCCCTCAGAGGAGTCCAGAGTCCAGCAAGGAATCAGAGGGAAGCTGCAGAGGACAGGGTACAGGATCTGGAGGACATGTGCTGCAAGAG/
ATCAGCAGGAGCTGGCAGAGACCCGGCTCCCTCGGCTGCCCTTTGGACCAGAAAGAAAAGGAGCAGCAGCATAGCCTCCACCCTGGGGCTGAAAAA/
CTCTTCTCAGCCCTGGGCCAGAGTTCCCGGCCAAGCTGGGGCAAGTCCCGCAGTACAGTGTGGAGCAGTTGAGCCCGCCCGCCCTGGCCTGACGTCACAG/
CCAGGGCCCCATCGTTACAATCCCTGCACCCGGTGTACCCCTCACCAGCTCGGAAAGCTGCTCTTTTACAACCTCCATCTCTGCTGAGCAGCAAGG/
GGACCGTCCAGCCCTTACCTGGTAGCAGGGCCAGGGGACCAGTGCAGCTGGCAGCCGACAGACTTCAACCAGCCGCTGCCCTCAGTGTGGAGGACGTG/
GTGCTCCAGCCTGTCTCGCACCTGGGCCGCTGGTGGAGGTGTTCCAGACAGCACCAGCCAGCTGCAGCTGCAGCGCTCTCCAAGGGCACTTTCGGCTT/
TGCGTGCCTCTGGGAATGGCGCCAGACTCAGGGACGCCTCTCTGAGATATTTCCGCTGGGCGTTTCGATCCATCCATGGGGTCCCTGATTATTTCAAGTGG/
TATGTGACTCGCACCTATCACCACATGACATGTCACCTCAGCGAGGATCACGCCATGAATGCGAAAACCTGCTGATCCTGGAAGTACCTCACCTGCGAAA/
CCTGGCACCCAAAGTTTCCAAGTGA

**5' partner: PPIL1**

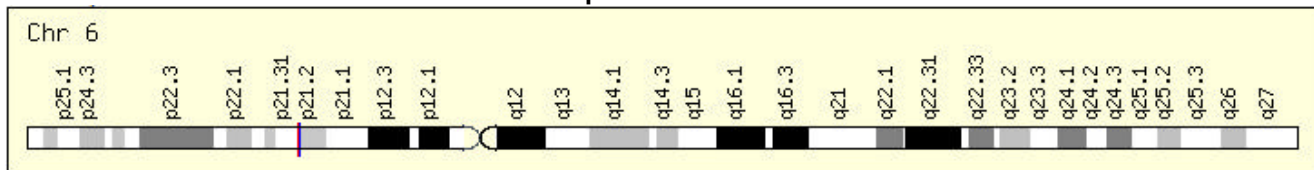

**Junction point**

exon=2 309..463

/gene="PPIL1"

/gene\_synonym="CGI-124; CYPL1; hCyPX; MGC678; PPIase"

**BLAST vs mRNA**

>ref|NM\_016059.4| Homo sapiens peptidylprolyl isomerase (cyclophilin)-like 1 (PPIL1), mRNA  
Length=1750

GENE ID: 51645 PPIL1| peptidylprolyl isomerase (cyclophilin)-like 1 [Homo sapiens]

Score = 437 bits (484), Expect = 3e-126

Identities = 242/242 (100%), Gaps = 0/242 (0%)

Strand=Plus/Plus

```

Query 12  CTAGACAAGCATTCCGCCGCCGGCTTCGCTATGGCGGCAATCCCCAGATTCTGGCAG 71
          |||
Sbjct 223  CTAGACAAGCATTCCGCCGCCGGCTTCGCTATGGCGGCAATCCCCAGATTCTGGCAG 282
    
```

```

Query 72  CCACCCAACGTTTACTTGGAGACCAGCATGGGAATCATTGTGCTGGAGCTGTACTGGAAG 131
Sbjct 283  CCACCCAACGTTTACTTGGAGACCAGCATGGGAATCATTGTGCTGGAGCTGTACTGGAAG 342

Query 132  CATGCTCCAAGACCTGTAAGAACTTGCTGAGTTGGCTCGTCGAGGTTACTACAATGGC 191
Sbjct 343  CATGCTCCAAGACCTGTAAGAACTTGCTGAGTTGGCTCGTCGAGGTTACTACAATGGC 402

Query 192  ACAAATTCACAGAATTATCAAAGACTTCATGATCCAAGGAGGTGACCCCAACAGGGACA 251
Sbjct 403  ACAAATTCACAGAATTATCAAAGACTTCATGATCCAAGGAGGTGACCCCAACAGGGACA 462

Query 252  GG 253
Sbjct 463  GG 464
    ↑
  
```

3' partner: KIAA1614

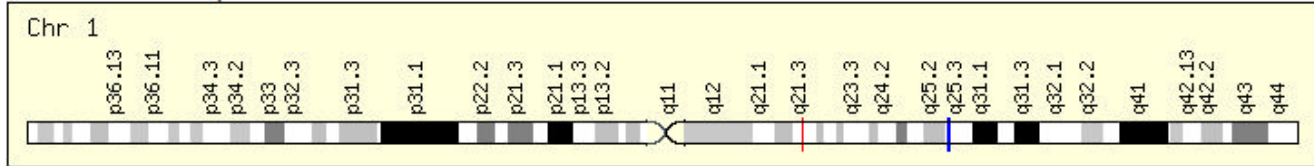

**Junction point**  
**exon=6** 2829..2985  
 /gene="KIAA1614"  
 /gene\_synonym="RP11-46A10.3"

**BLAST vs mRNA**

```

>ref|NM_020950.1| Homo sapiens KIAA1614 (KIAA1614), mRNA
Length=4155
GENE ID: 57710 KIAA1614| KIAA1614 [Homo sapiens]
Score = 1238 bits (1372), Expect = 0.0
Identities = 712/724 (98%), Gaps = 4/724 (0%)
  
```

Strand=Plus/Plus

```

    ↓
Query 252  GGAGGACCCAGGGCTTTCTTGGCTCAGCAGATGTTGCCACCATCAACTCCACGGGCATC 311
Sbjct 2828  GGAGGACCCAGGGCTTTCTTGGCTCAGCAGATGTTGCCACCATCAACTCCACGGGCATC 2887

Query 312  ACCCTCTCCCTGTCTCCTCAGAGGAGTCAGAGTCCAGCAAGGAATCAGAGGGAAGCCTGCAG 371
Sbjct 2888  ACCCTCTCCCTGTCTCCTCAGAGGAGTCAGAGTCCAGCAAGGAATCAGAGGGAAGCCTGCAG 2947

Query 372  AGGACAGGGTCAGGATCTGGAGGACATGTGCTGTCAAGAGCATCAGCAGGAGCTGGCACA 431
Sbjct 2948  AGGACAGGGTCAGGATCTGGAGGACATGTGCTGTCAAGAGCATCAGCAGGAGCTGGCACA 3007

Query 432  GGACCCGGCTCCCCCTCGGCTGCCCTTTGGACCAGAACAGAAAAGGAGCAGCAGCATA 491
Sbjct 3008  GGACCCGGCTCCCCCTCGGCTGCCCTTTGGACCAGAACAGAAAAGGAGCAGCAGCATA 3067

Query 492  GCCTCCACCCTGGGGCTGAAAAAGCTCTTCTCAGCCCTGGGCCAGAGTTCCCGGCCAAG 551
Sbjct 3068  GCCTCCACCCTGGGGCTGAAAAAGCTCTTCTCAGCCCTGGGCCAGAGTTCCCGGCCAAG 3127

Query 552  CTGGGCAAGTCCCGCAGCTACAGTGTGGAGCAGTTGCAGCCCGCCCGCCTGGCCTGACG 611
Sbjct 3128  CTGGGCAAGTCCCGCAGCTACAGTGTGGAGCAGTTGCAGCCCGCCCGCCTGGCCTGACG 3187

Query 612  TCACAGTCCAGGGCCCCATCGTTACAATCCCTGCACCCGGTGTACCCTTCACCAGCGT 671
Sbjct 3188  TCACAGTCCAGGGCCCCATCGTTACAATCCCTGCACCCGGTGTACCCTTCACCAGCGT 3247

Query 672  CGGAAAGCTGCCTCTTTTCAGAACCTCCATTCTCTGCTGAGCAGCAAGGGGACCGGTCC 731
Sbjct 3248  CGGAAAGCTGCCTCTTTTCAGAACCTCCATTCTCTGCTGAGCAGCAAGGGGACCGGTCC 3307

Query 732  AGCCTTACCTGGTAGCAGGGCCAGGGACCACAGTGCAGCTGGCA-GCCGGCCAAGACT 790
Sbjct 3308  AGCCTTACCTGGTAGCAGGGCCAGGGACCACAGTGCAGCTGGCAGGCGCGCCAAGACT 3367

Query 791  TCACCACGGCGTGCCTCAGTGTGGAGGACGTGGGTGCTCCCAGCCTGTCTCGCACCGTG 850
Sbjct 3368  TCACCACGGCGTGCCTCAGTGTGGAGGACGTGGGTGCTCCCAGCCTGTCTCGCACCGTG 3427

Query 851  GGCCGCTGGTGGAGGTGTTCCAGACAGCACCAGCCAGCTGCAGCTGCAGCGCTCTCCA 910
Sbjct 3428  GGCCGCTGGTGGAGGTGTTCCAGACAGCACCAGCCAGCTGCAGCTGCAGCGCTCTCCA 3487
  
```

```

Query 911 -AGGGCACTTTCGGCTTCTGCGT-GCCTCTGGGAAT-GGCGCCAGACTCAGGGACGCAC 967
          |||
Sbjct 3488 GGGGGCACTTTCGGCTTCTGCGTGGGAATGGGGCCAGACTCAGGTATGCC 3547

Query 968 TCTC 971
          |||
Sbjct 3548 TCTC 3551
    
```

**WDR70- ANKLE2**

TTGGGGTCTGCGGGCTGCGGCCAGCCATGGAGCGCTCTGGGCCAGCGAAGTGACAGGCTCAGACGCATCGGGACCGGACCCGCAGCTTGCGGTACCATG/
GCTTACAGGGGTTCCGGTAAAAAAGCTCGCACATTTGACTTGGAAAGCAATGTTTGAACAAACTCGAAGAACAGCTGTGGAAGAAGTTGCAAAACACTGGGTG/
AATGACAATGGATGCTCTGTTGGCTCGATTGAACTTCTGAATCCAGATGACCTTAGAGAAGAAATCGTCAAAGCCGGATTGAAATGTGGACCCATTACATC/
ACTACAAGGTTTCATTTTGGAGAAAAAATTGGCTCAGGCTTACTGGAGCAAGGAGGAAGGCTGTCTTCTTTCTACCACCATGAGGCAGGTGTACAGCTCTC/
GCCAGGACCCACAAAGGATTTTGAAGCCAGCTGAAGGGAAACCAACTGATCAGGCTGGTTTTTCTGAAGACAGAGATTTTGGTTACAGTGTGGGCCTGAATC/
TCCAGAGGAGGAAGCTGTGACATCCAAGACCTGCTCGGTGCCTTAGTGACACCCGACACCTACAGAGCTGGAGCGACTGCGTCTAAGGAGCCGCCCTGTAC/
TATGGGTGTGTCCAGTGTATGAGGACGTCCACGCGAATAAGGATGAAAGGATCTATGTTTATGAAAATAAAAAAGGAAGCATGCAAGCTGTCAAGATGATCAAA/
GGTCCCGATTTAAAGCTTTTTCTACCAGAGAAGACGCTGAGAAATTTGCTAGAGGAATTTGTGATTTTCCCTTCTCCAAGCAAACGTCCTTACCAGTGT/
TCCTGTGAAAACAGCTCCACTCTTTAGCAATGACAGGTTGAAAGATGGTTTGTGCTTGTTCGGATCAGAACAGTCAACAAAGAGCGAGCGAACAGTTACAAAA/
TCCCCGACGCGACACCTCACCGCCAGCTTCGGAAAGCTGTGAGAGAGACGAGACACCATTTCTGACCTTATCTGAGCACCCCGGTATCTGATAGCTCAGGAG/
CACCACATCTGTCAGAGATGCAGTACACGTGATGCTGTGCAAGAGAACAGCTTCATCTGCAGTACTGACGCTGAAACCTGACTTCTGAGGC/
GAGTACTGATGACACAAGCATGCGTGTGAGCGGATTCCGTTACTGGGGGGACCTGTTATTCTTACACCCCGACA

**5' partner: WDR70**

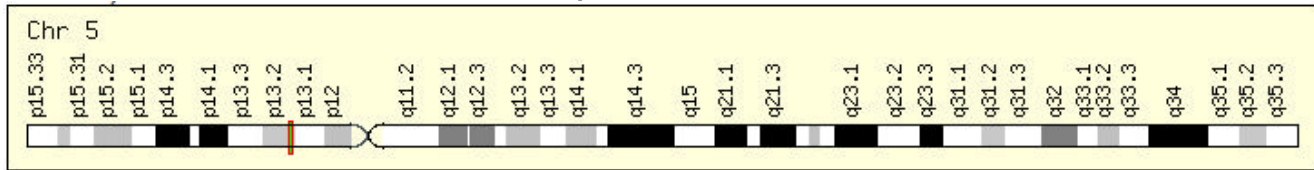

**Junction point**  
**exon=3** 150..233  
/gene="WDR70"  
/gene\_synonym="FLJ10233"

**BLAST vs mRNA**

```

>ref|NM_018034.2| Homo sapiens WD repeat domain 70 (WDR70), mRNA
Length=2247
Score = 334 bits (370), Expect = 4e-95
Identities = 193/198 (97%), Gaps = 0/198 (0%)
    
```

Strand=Plus/Plus

```

Query 5 GGTTCGCGGCGTGCAGCCATGGAGCGCTCTGGGCCAGCGAAGTGACAGGCTCAG 64
          |||
Sbjct 36 GGTTCGCGGCGTGCAGCCATGGAGCGCTCTGGGCCAGCGAAGTGACAGGCTCAG 95

Query 65 ACGCATCGGGACCGGACCCGACGCTTGCGGTCACCATGGGCTTACGGGGTTCGGTAAAA 124
          |||
Sbjct 96 ACGCATCGGGACCGGACCCGACGCTTGCGGTCACCATGGGCTTACGGGGTTCGGTAAAA 155

Query 125 AAGCTCGCACATTTGACTTGGAAAGCAATGTTTGAACAAACTCGAAGAACAGCTGTGAAAA 184
          |||
Sbjct 156 AAGCTCGCACATTTGACTTGGAAAGCAATGTTTGAACAAACTCGAAGAACAGCTGTGAAAA 215

Query 185 GAAGTTGCAAAACACTGG 202
          |||
Sbjct 216 GAAGTTGCAAAACACTGG 233
    
```

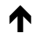

**3' partner: ANKLE2**

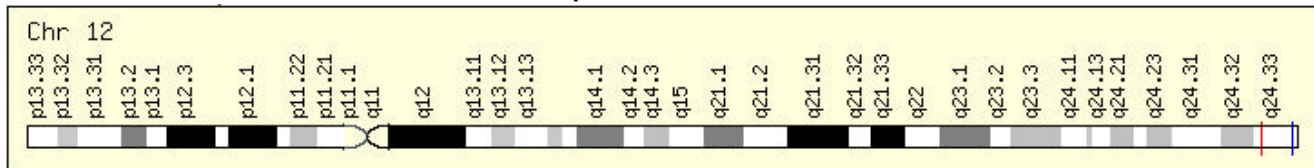

**Junction point**  
**exon=2** 249..707  
/gene="ANKLE2"

/gene\_synonym="FLJ22280; FLJ36132; KIAA0692; LEMD7"

**BLAST vs mRNA**

>ref|NM\_015114.1| Homo sapiens ankyrin repeat and LEM domain containing 2 (ANKLE2), mRNA  
Length=4491  
GENE ID: 23141 ANKLE2 | ankyrin repeat and LEM domain containing 2 [Homo sapiens]  
Score = 1517 bits (1682), Expect = 0.0  
Identities = 986/1049 (93%), Gaps = 45/1049 (4%)

Strand=Plus/Plus

↓

```

Query 202  GGTGAAATGACAATGGATGCTCTGTTGGCTCGATTGAAACTTCTGAATCCAGATGACCTT 261
          |||
Sbjct 248  GGTGAAATGACAATGGATGCTCTGTTGGCTCGATTGAAACTTCTGAATCCAGATGACCTT 307

Query 262  AGAGAAGAAATCGTCAAAGCCGGATTGAAATGTGGACCCATTACATCAACTACAAGGTT 321
          |||
Sbjct 308  AGAGAAGAAATCGTCAAAGCCGGATTGAAATGTGGACCCATTACATCAACTACAAGGTT 367

Query 322  ATTTTGGAGAAAAAATGGCTCAGGCTTTACTGGAGCAAGGAGGAAGGCTGTCTCTTTTC 381
          |||
Sbjct 368  ATTTTGGAGAAAAAATGGCTCAGGCTTTACTGGAGCAAGGAGGAAGGCTGTCTCTTTTC 427

Query 382  TACCACCATGAGGCAAGTGTACAGCTCTCAGCCAGGACCCACAAGGATTTGAAGCCA 441
          |||
Sbjct 428  TACCACCATGAGGCAAGTGTACAGCTCTCAGCCAGGACCCACAAGGATTTGAAGCCA 487

Query 442  GCTGAAGGGAACCAACTGATCAGGCTGGTTTTTCTGAAGACAGAGATTTGGTTACAGT 501
          |||
Sbjct 488  GCTGAAGGGAACCAACTGATCAGGCTGGTTTTTCTGAAGACAGAGATTTGGTTACAGT 547

Query 502  GTGGGCTGAATCCTCCAGAGGAGGAAGCTGTGACATCCAAGACCTGCTCGGTGCCCTCT 561
          |||
Sbjct 548  GTGGGCTGAATCCTCCAGAGGAGGAAGCTGTGACATCCAAGACCTGCTCGGTGCCCTCT 607

Query 562  AGTGACACCGCACCTACAGAGCTGGAGCGACTGCGTCTAAGGAGCCGCCCTGTACTAT 621
          |||
Sbjct 608  AGTGACACCGCACCTACAGAGCTGGAGCGACTGCGTCTAAGGAGCCGCCCTGTACTAT 667

Query 622  GGGGTGTGCCAGTGTATGAGGACGTCCCAGCGAGAAATGAAAGGATCTATGTTTATGAA 681
          |||
Sbjct 668  GGGGTGTGCCAGTGTATGAGGACGTCCCAGCGAGAAATGAAAGGATCTATGTTTATGAA 727

Query 682  AATAAAAAGGAAGCATTGCAAGCTGTCAAGATGATCAAAGGGTCCCATTAAAGCTTTT 741
          |||
Sbjct 728  AATAAAAAGGAAGCATTGCAAGCTGTCAAGATGATCAAAGGGTCCCATTAAAGCTTTT 787

Query 742  TCTACCAGAGAAGACGCTGAGAAATTTGCTAGAGGAATTTGTGATTATTTCCCTTCTCCA 801
          |||
Sbjct 788  TCTACCAGAGAAGACGCTGAGAAATTTGCTAGAGGAATTTGTGATTATTTCCCTTCTCCA 847

Query 802  AGCAAAACGTCCTTACCCTGTCTCCTGTGAAAACAGCTCCACTCTTTAGCAATGACAGG 861
          |||
Sbjct 848  AGCAAAACGTCCTTACCCTGTCTCCTGTGAAAACAGCTCCACTCTTTAGCAATGACAGG 907

Query 862  TTGAAAGATGGTTTGTGCTTGTCTGG-ATCAG-AACAGTCAACAAGAGCGAGCGAACAGT 919
          |||
Sbjct 908  TTGAAAGATGGTTTGTGCTTGTCTGGGAATCAGAAACAGTCAACAAGAGCGAGCGAACAGT 967

```

**TAF11- FAM62B**

TTGGCTTCTGCCTCAGGCATCTCCGCGATCTCCTCTCCCCTCCAATCCTATCCGTGATGGACGATGCCACGAGTGCCTCCGACAAAGGTGGAGAGACAG  
GGAGTCGATGAGACGGCCGCTGTGCCCGGGGACCCGGGGGCTACCGACACCGATGGAATCCCAGAGGAACTGACGGAGACGAGATGTGGACTGAAAGA  
GCTGCAGCGGAGGAAGGCGAGATTCGATACAAAACCAATGAACCTGTGTGGGAGGAAAACCTCACTTTCTTCATTACAAATCCAAGCGCCAGGACCTTGAA  
TTGAGGTGAGAGACGAGCAGCACCAGTGTCCCTGGGGAACTGAAGTCCCTCAGCCAGCTGCTCACCAGTGGAGACATGACTGTGAGCCAGCGCTTCC  
GCTCAGTAACTCGGGTCCAAACAGCACCATCAAGATGAAGATTGCCCTGCGGGTGTCCATCTCGAAAAGCGAGAAAGGCTCCAGACCACCAACTCAGC  
CAAGTCAAACGTCCTCTGTGTCCAAAGAGGGGAGGAAAACATCCATCAAATCTCATATGTCTGGGTCTCCAGGCCAACACAGCTCCATCC  
CACCAGTCATTGGGGGAGTGATAAGCCTGGTATGGAAGAAAAGGCCAGCCCTGAGGCGGCCCTCAAGGGCTGCACGACCTGGCAGAAGCTCCTCCAG  
CTCCTGGCCTCCCAGGCCACATCTCAGTCAAGGAGCCGACCCCGATCGCCTCGGACATCTCGCTGCCATCGCCACCAGGAGCTGCGGCAAACTGA  
CAGCTGGAAAACGGGACGACCTGGGACAGTCTCCACTGGGGCAGATCCAGTACCATCCGGCACAGCTCGCAGAGAACAAGCTTATCGTGGTGTGTCATG  
CTGCAGAACTCATTGCTTCTGTGAGACGCTGACCCATGTCGCATGTATTTATACGGACAGAGCGGTGAGGAGAGAAACCCCGGTCAAGAAAATTA  
TCAATGTTGATCAGCTGATCAGTTCGTACAAAATGCAAGAACCTGACGTGTGAGACTGCGCTCGTCAGACAGGTCCTGGCAGATTGTGTCTGCACCTGAAA  
CTTGCCA

5' partner: TAF11

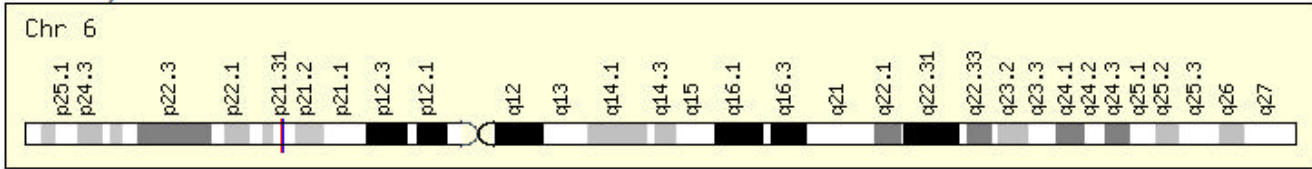

Junction point

exon=1 1..256  
 /gene="TAF11"  
 /gene\_synonym="MGC:15243; PRO2134; TAF2I; TAFII28"

BLAST vs mRNA

```
>ref|NM_005643.2| Homo sapiens TAF11 RNA polymerase II, TATA box binding protein (TBP)-associated factor, 28kDa (TAF11), mRNA
Length=1599
GENE ID: 6882 TAF11 | TAF11 RNA polymerase II, TATA box binding protein (TBP)-associated factor, 28kDa [Homo sapiens]
Score = 405 bits (448), Expect = 2e-116
Identities = 224/224 (100%), Gaps = 0/224 (0%)
```

Strand=Plus/Plus

```
Query 4 GCTTCTGCCTCAGGCATCTCCGGATCTCCTCTCCCTCCAATCCTATCCGTGATGGACG 63
      |||
Sbjct 33 GCTTCTGCCTCAGGCATCTCCGGATCTCCTCTCCCTCCAATCCTATCCGTGATGGACG 92

Query 64 ATGCCACGAGTCGCCCTCCGACAAAAGGTGGAGAGACAGGGGAGTCGGATGAGACGGCCG 123
      |||
Sbjct 93 ATGCCACGAGTCGCCCTCCGACAAAAGGTGGAGAGACAGGGGAGTCGGATGAGACGGCCG 152

Query 124 CTGTGCCCGGGGACCCGGGGGCTACCGACACCCGATGGAATCCCAGAGGAAACTGACGGAG 183
      |||
Sbjct 153 CTGTGCCCGGGGACCCGGGGGCTACCGACACCCGATGGAATCCCAGAGGAAACTGACGGAG 212

Query 184 ACGCAGATGTGGACTTGAAGAAGCTGCAGCGGAGGAAGGCCGAG 227
      |||
Sbjct 213 ACGCAGATGTGGACTTGAAGAAGCTGCAGCGGAGGAAGGCCGAG 256
```

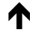

3' partner: FAM62B

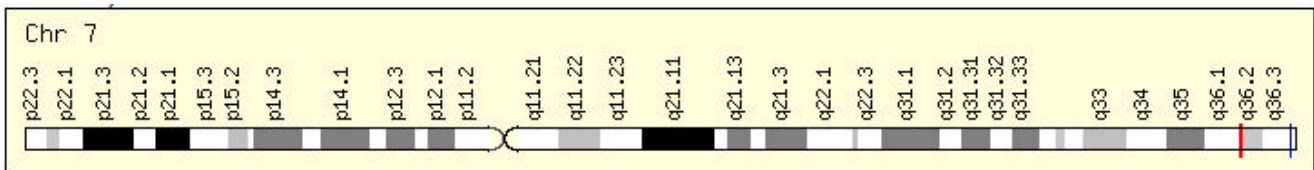

Junction point

exon=15 1705..1791  
 /gene="FAM62B"  
 /gene\_synonym="CHR2SYT; ESYT2; KIAA1228"

BLAST vs mRNA

```
>ref|NM_020728.2| Homo sapiens family with sequence similarity 62 (C2 domain containing) member B (FAM62B), mRNA
Length=5957
GENE ID: 57488 FAM62B | family with sequence similarity 62 (C2 domain containing) member B [Homo sapiens]
Score = 1321 bits (1464), Expect = 0.0
Identities = 802/828 (96%), Gaps = 18/828 (2%)
```

Strand=Plus/Plus

```
Query 217 AGGAAGGCAGATTCGATACAAAACCAATGAACCTGTGTGGGAGGAAAACCTCACTTTCT 276
      |||
Sbjct 1694 AGGAGACCAAGATTCGATACAAAACCAATGAACCTGTGTGGGAGGAAAACCTCACTTTCT 1753
```

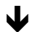

```

Query 277 TCATTACAATCCCAAGCGCCAGGACCTTGAAGTTGAGGTGAGAGACGAGCAGCACCAGT 336
      |||
Sbjct 1754 TCATTACAATCCCAAGCGCCAGGACCTTGAAGTTGAGGTGAGAGACGAGCAGCACCAGT 1813

Query 337 GTTCCCTGGGGAACCTGAAGGTCCCCCTCAGCCAGCTGCTCACCAGTGAGGACATGACTG 396
      |||
Sbjct 1814 GTTCCCTGGGGAACCTGAAGGTCCCCCTCAGCCAGCTGCTCACCAGTGAGGACATGACTG 1873

Query 397 TGAGCCAGCGCTTCCAGCTCAGTAACTCGGGTCCAAACAGCACCATCAAGATGAAGATTG 456
      |||
Sbjct 1874 TGAGCCAGCGCTTCCAGCTCAGTAACTCGGGTCCAAACAGCACCATCAAGATGAAGATTG 1933

Query 457 CCCTGCGGGTGTCTCCATCTCGAAAAGCGAGAAAAGGCCCTCCAGACCACCAACTCAGCTC 516
      |||
Sbjct 1934 CCCTGCGGGTGTCTCCATCTCGAAAAGCGAGAAAAGGCCCTCCAGACCACCAACTCAGCTC 1993

Query 517 AAGTCAAACGTCCTCTGTGTCCAAAGAGGGGAGGAAAACATCCATCAAATCTCATATGT 576
      |||
Sbjct 1994 AAGTCAAACGTCCTCTGTGTCCAAAGAGGGGAGGAAAACATCCATCAAATCTCATATGT 2053

Query 577 CTGGGTCTCCAGGCCCTGGTGGCAGCAACACAGCTCCATCCACACCAGTCATTGGGGGCA 636
      |||
Sbjct 2054 CTGGGTCTCCAGGCCCTGGTGGCAGCAACACAGCTCCATCCACACCAGTCATTGGGGGCA 2113

Query 637 GTGATAAGCCTGGTATGGAAGAAAAGGCCAGCCCCCTGAGGCCGGCCCTCAAGGGCTGC 696
      |||
Sbjct 2114 GTGATAAGCCTGGTATGGAAGAAAAGGCCAGCCCCCTGAGGCCGGCCCTCAAGGGCTGC 2173

Query 697 ACGACCT-GGCAGAAGTCTCCAGCCTCCTGGCCTCCCCAGGCCACATCTCAGTCAAGG 755
      |||
Sbjct 2174 ACGACCTGGGCAGAAGTCTCCAGCCTCCTGGCCTCCCCAGGCCACATCTCAGTCAAGG 2233

Query 756 AGCCGACCCCGAGCATCGCCTCGGACATCTCGTGCCTCCGCCACCCAGGAGCTGCGGC 815
      |||
Sbjct 2234 AGCCGACCCCGAGCATCGCCTCGGACATCTCGTGCCTCCGCCACCCAGGAGCTGCGGC 2293
    
```

**NOL11- C7orf42**

TCAAATTATAACAAGTCCAGCTGTGTGCAACTTTCAAACCTGGAGAGTATGTTGTTGTACACGGTTAATAAGGTTTTAAGAATATGGAATAATGAAGATGTAA;  
 CCTGGATAAAGTATTTAAAGCTACATTGTCAGCAGAAGTATATAGGATACTTTTCAGTGCAAGGGACAGAACCCCTTGGTGCCTTTCAAGGAAGGTGCTGTTCCG;  
 GGTTTAGAGGCCCTTGCTTGACAGCCCCCAGCAGAAAATTGAAACTGTTATCTCTGTATGAAGAAGTGATTAAACAGCCACCCGCACTGTGTTCTTGACACGTAC;  
 GCAACGCCACGTTCTGGTACAAGATCTTCACAACCTGCCAGGGATGCCAACACAAAATACGCCCAAGATTACAATCCTTTCTGGTGTATAAGGGGGCCATTG;  
 AAAAGTTTATCATGCTTTAAATCCCAAGCTTACAGTGATTGTTCCAGATGATGACCGTTCATTAATAAATTTGCATATCAAGCACACCAGTTACTTCTCTAAA;  
 GTGATGTTGTTAAACAATGTTTTGAAAAGATGTAATCTTGGGCTGACGTAGCAAAAAGAGTCAGAGCAATCAAGAAAAAATCCCGAGAAGGTGGATTGG

**5' partner: NOL11**

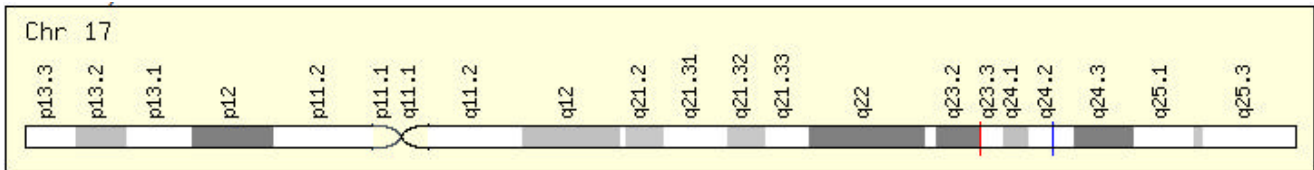

**Junction point**  
 exon=4 316..464  
 /gene="NOL11"  
 /gene\_synonym="DKFZp586L0724"

**BLAST vs mRNA**

```

>ref|NM_015462.3| Homo sapiens nucleolar protein 11 (NOL11), mRNA
Length=2454
GENE ID: 25926 NOL11 | nucleolar protein 11 [Homo sapiens]
Score = 484 bits (536), Expect = 2e-140
Identities = 275/278 (98%), Gaps = 1/278 (0%)
    
```

Strand=Plus/Plus

```

Query 5 CTTGGGGAGCTGGTCAGTGAACAAGGTCAAATTATAACATGTCCAGCTGTGTGCAACTT 64
      |||
Sbjct 162 CTTGGGGAGCTGGTCAGTGAACAAGGTCAAATTATAACATGTCCAGCTGTGTGCAACTT 221

Query 65 TCAAACCTGGAGAGTATGTTGTTGTACACGATAATAAGGTTTTAAGAATATGGAATAATGA 124
      |||
Sbjct 222 TCAAACCTGGAGAGTATGTTGTTGTACACGATAATAAGGTTTTAAGAATATGGAATAATGA 281

Query 125 AGATGTAAACCTGGATAAAGTATTTAAAGCTACATTGTCAGCAGAAGTATATAGGATACT 184
      |||
Sbjct 282 AGATGTAAACCTGGATAAAGTATTTAAAGCTACATTGTCAGCAGAAGTATATAGGATACT 341

Query 185 TTCAGTGCAAGGGACAGAACCCCTTGGTGTCTTCAAGGAAGTGCTGTTCTGCTGTTTAGA 244
      |||
Sbjct 342 TTCAGTGCAAGGGACAGAACCCCTTGGTGTCTTCAAGGAAGTGCTGTTCTGCTGTTTAGA 401
    
```



```

Query 245 GGCCTTGCTTGCAGACCCCCAGCAGAAAATTGAAACTGTTATCTCTGATGAAGAAGTGAT 304
          |||
Sbjct 402 GGCCTTGCTTGCAGACCCCCAGCAGAAAATTGAAACTGTTATCTCTGATGAAGAAGTGAT 461

Query 305 TAAA 308
          |||
Sbjct 462 TAAA 465
          ↑
    
```

3' partner: C7orf42

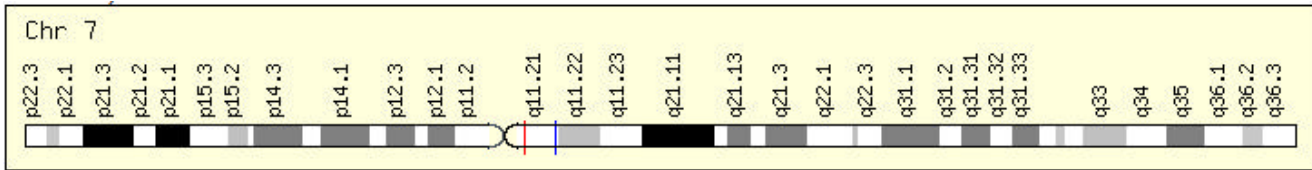

Junction point

```

exon=5 861..1044
/gene="C7orf42"
/gene_synonym="FLJ10099; FLJ13090"
    
```

BLAST vs mRNA

```

>ref|NM_017994.4| Homo sapiens chromosome 7 open reading frame 42 (C7orf42), mRNA
Length=4238
GENE ID: 55069 C7orf42| chromosome 7 open reading frame 42 [Homo sapiens]
Score = 475 bits (526), Expect = 2e-137
Identities = 309/338 (91%), Gaps = 1/338 (0%)
    
```

Strand=Plus/Plus

```

          ↓
Query 308 ACAGCCACCCGACTGTGTTCTGACACGTACAGCAACGCCACGCTCTGGTACAAGATCTT 367
          |||
Sbjct 861 ACAGCCACCCGACTGTGTTCTGACACGTACAGCAACGCCACGCTCTGGTACAAGATCTT 920

Query 368 CACAAGTCCAGAGATGCCAACACAAAATACGCCAAGATTACAATCCTTTCTGGTGTTA 427
          |||
Sbjct 921 CACAAGTCCAGAGATGCCAACACAAAATACGCCAAGATTACAATCCTTTCTGGTGTTA 980

Query 428 TAAGGGGGCCATTGAAAAGTCTATCATGCTTTAAATCCCAAGCTTACAGTGATTGTTCC 487
          |||
Sbjct 981 TAAGGGGGCCATTGAAAAGTCTATCATGCTTTAAATCCCAAGCTTACAGTGATTGTTCC 1040

Query 488 AGATGATGACCGTTTCATTAATAAATTTGCATCTCATGCACACCCAGTTACTTCCTTTTGT 547
          |||
Sbjct 1041 AGATGATGACCGTTTCATTAATAAATTTGCATCTCATGCACACCCAGTTACTTCCTTTTGT 1100

Query 548 GATGGTGATAACAATGTTTGGCTATGCTGTTATCAAGGGCAGACCTAGCAAATTCGCTCA 607
          |||
Sbjct 1101 GATGGTGATAACAATGTTTGGCTATGCTGTTATCAAGGGCAGACCTAGCAAATTCGCTCA 1160

Query 608 GAGCAATCCTGAATTTGTCCCGAGAAGGTGGCTTTGGCTGAAGCCTAATCCACAGCTC 667
          |||
Sbjct 1161 GAGCAATCCTGAATTTGTCCCGAGAAGGTGGCTTTGGCTGAAGCCTAATCCACAGCTC 1220

Query 668 CTTGTTTTTGTAGAGAGAGACTGAGAGAACCATAATCCTTGCCTGCTGAACCCAGCCTGGGC 727
          |||
Sbjct 1221 CTTGTTTTTGTAGAGAGAGACTGAGAGAACCATAATCCTTGCCTGCTGAACCCAGCCTGGGC 1280

Query 728 CTGGATGCTCTGTGAATACATTATCTTGCATGTTGGGTTATTCCAGCCAAAGACATTTTC 787
          |||
Sbjct 1281 CTGGATGCTCTGTGAATACATTATCTTGCATGTTGGGTTATTCCAGCCAAAGACATTTTC 1340

Query 788 AAGTGCCCTGTAACGTATTTGTACATATTTAT-AAAATCTATTTCAGA 832
          |||
Sbjct 1341 AAGTGCCCTGTAACGTATTTGTACATATTTATAAAAATCTATTTCAGA 1386
    
```

NSUN5B- CPSF3

```

TTGGGCCCGCAGGGCTCTATCAAGGGGCTGGTGTACTCCAGCAACTCCAGAACGTGAAGCAGCTGTACGCGCTGGTGTGCGAAACGCAGCGCTACTCCGCC
TGCTGGATGCCGTGATCTCCAGCGCCGGCCCTCTCAGTGCAGGAAGCTGCAGCCGCACCTGGCCAAGGGTGCAGTACAGAAGGTTTTTAAAAAATAGAAA'
GCACGTTTACAGCAAGAGGTTGGAGATCATGCTCCAGGACATATTTGGAGAAGACTGTGTAAGTGTAAAGGATGACTCTATTTTACGCTCACAGTGGACGG(
AAAATGCCAACCTTAACTTGGAGACACGGACTGTAGAATGTGAAGAGGGAAAGTGAAGACGATGAATCCCTCCGAGAAATGGTGGAGCTGGCTGCACAGAGA(
TGTACGAGGCCCTGACGCCAGTTCCTGAGACTGTGCCTGTATATGAACTTTGAAAAATACTTGACTTTACTTTTGTACCTAAAATAAATGCATTCGTT'
TTTTG
    
```

## 5' partner: NSUN5B

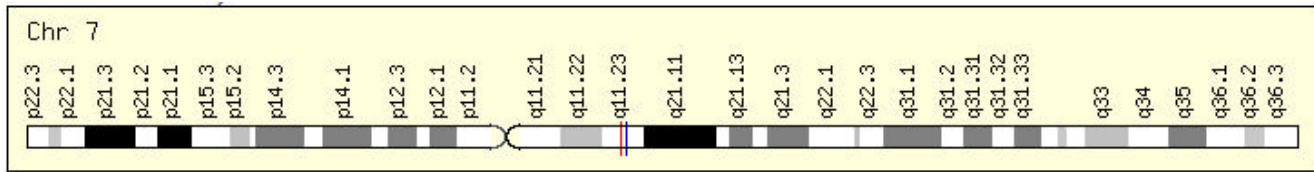

## Junction point

exon=2 121..241

/gene="NSUN5P1"

/gene\_synonym="FLJ99347; MGC129801; NSUN5B; WBSCR20B"

## BLAST vs mRNA

>ref|NR\_033322.2| Homo sapiens NOP2/Sun domain family, member 5 pseudogene 1 (NSUN5P1), non-coding RNA  
Length=1751

GENE ID: 155400 NSUN5P1| NOP2/Sun domain family, member 5 pseudogene 1 [Homo sapiens]

Score = 311 bits (168), Expect = 3e-84

Identities = 168/168 (100%), Gaps = 0/168 (0%)

Strand=Plus/Plus

```

Query 5   GCCGCCAGGGCTCTATCAAGGGGCTGGTGTACTCCAGCAACTTCCAGAACGTGAAGCAGC 64
          |||
Sbjct 74   GCCGCCAGGGCTCTATCAAGGGGCTGGTGTACTCCAGCAACTTCCAGAACGTGAAGCAGC 133

Query 65   TGTACGCGCTGGTGTGCGAAACGACGCGCTACTCCGCCGTGCTGGATGCCGTGATCTCCA 124
          |||
Sbjct 134  TGTACGCGCTGGTGTGCGAAACGACGCGCTACTCCGCCGTGCTGGATGCCGTGATCTCCA 193

Query 125  GCGCCGGCCTCCTCAGTGCGAAGAAGCTGCAGCCGCACCTGGCCAAGG 172
          |||
Sbjct 194  GCGCCGGCCTCCTCAGTGCGAAGAAGCTGCAGCCGCACCTGGCCAAGG 241

```

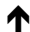

## 3' partner: CPSF3

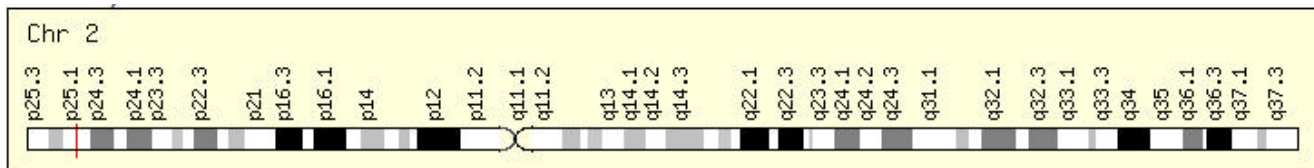

## Junction point

exon=16 1822..1891

/gene="CPSF3"

/gene\_synonym="CPSF; CPSF-73; CPSF73; YSH1"

## BLAST vs mRNA

>ref|NM\_016207.2| Homo sapiens cleavage and polyadenylation specific factor 3, 73kDa (CPSF3), mRNA  
Length=2286

Score = 609 bits (674), Expect = 5e-178

Identities = 343/347 (98%), Gaps = 0/347 (0%)

Strand=Plus/Plus

```

Query 169  AAGGGTGCAGTACAGAAGGTTTTTAAAAAATTAGAAATGCACGTTTACAGCAAGAGGTTG 228
          |||
Sbjct 1818  AAAGGTGCAGTACAGAAGGTTTCTAAAAAATTAGAAATGCACGTTTACAGCAAGAGGTTG 1877

Query 229  GAGATCATGCTCCAGGACATATTTGGAGAAGACTGTGTAAGTGTAAAGGATGACTCTATT 288
          |||
Sbjct 1878  GAGATCATGCTCCAGGACATATTTGGAGAAGACTGTGTAAGTGTAAAGGATGACTCTATT 1937

Query 289  TTTAGCGTCACAGTGGACGGGAAAAC TGCCAACCTTAAC TTGGAGACACGGACTGTAGAA 348
          |||
Sbjct 1938  CTTAGCGTCACAGTGGACGGGAAAAC TGCCAACCTTAAC TTGGAGACACGGACTGTAGAA 1997

```

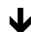

```

Query 349 TGTGAAGAGGGAAGTGAAGACGATGAATCCCTCCGAGAAATGGTGGAGCTGGCTGCACAG 408
          |||
Sbjct 1998 TGTGAAGAGGGAAGTGAAGACGATGAATCCCTCCGAGAAATGGTGGAGCTGGCTGCACAG 2057

Query 409 AGACTGTACGAGGCCCTGACGCCAGTTCACTGAGACTGTGCCTGTATATGAACCTTTGAAA 468
          |||
Sbjct 2058 AGACTGTACGAGGCCCTGACGCCAGTTCACTGAGACTGTGCCTGTATATGAACCTTTGAAA 2117

Query 469 AAATACTTGACTTTACTTTTGTGTACCTAAAAATAAAATGCATTCGTTT 515
          |||
Sbjct 2118 AAATACTTGACTTTACTTTTGTGTACCTAAAAATAAAATGCATTCGTTT 2164
    
```

**MSMB- POLE4**

AATGCCAACTTTGTACAAAAAAGTTGGAGGAGTCTTGCTTATCACAAATGAATGTTCTCTGGGCAGCGTTGTGATCTTTGCCACCTTCGTGACTTTATGCAA'
GCATCATGCTATTTTCATACCTAATGAGGGAGTTCAGGAGATTCAACCAGGAAATGCATGGATCTCAAAGGAAACAAACACCCAATAAACTCGGAGTGGCAG;
CTGACAACCTGTGAGACATGCACCTTGCTACGAAACAGAAATTTTCATGTTGCACCCCTATAATGCAATAGAAGCTGTGGATGAATTTGCTTTTCTGGAAGGTACT'
TAGATTGATTGCCGAGCGGGGCAGTTTGTGAGCCTTCATCTGAAGCCTTCAGTTCACCCCTCTGCACAGGCCTCAGCTTTGAAGAACGGAGTCTTGCACCT'
ACACACACTCTTCTGTCTGCTTACCTATGCCGGGATAAGCAGAGATCTCATCAATTAGCTCTTCTCTGCAAGGCTTCCACTGTTTCTGTCTGTCTTCC'
ATATCAAGCCTGGATGCAGCTGCTGCTGCTTAGAGCAGAGATGAAGAAAGTGTCTGCATAAGTGGCTTCCCTGAATGATGAGGACCAGAATAAAGGTTTTTG;
TCAACCTC

**5' partner: MSMB**

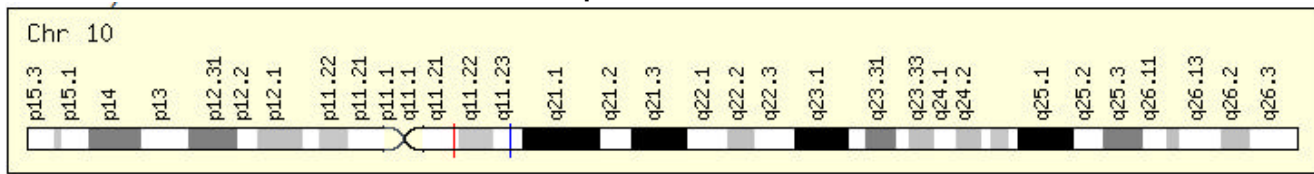

**Junction point**

exon=3 142..247  
/gene="MSMB"  
/gene\_synonym="HPC13; IGBF; MSP; MSPB; PN44; PRPS; PSP;  
PSP-94; PSP57; PSP94"

**BLAST vs mRNA**

```

>ref|NM_002443.2| Homo sapiens microseminoprotein, beta- (MSMB), transcript variant PSP94, mRNA
Length=572
GENE ID: 4477 MSMB microseminoprotein, beta- [Homo sapiens]
Score = 423 bits (468), Expect = 1e-122
Identities = 234/234 (100%), Gaps = 0/234 (0%)
    
```

Strand=Plus/Plus

```

Query 28 AGGAGTCTCTGCTTATCACAATGAATGTTCTCTGGGCAGCGTTGTGATCTTTGCCACCTT 87
          |||
Sbjct 14 AGGAGTCTCTGCTTATCACAATGAATGTTCTCTGGGCAGCGTTGTGATCTTTGCCACCTT 73

Query 88 CGTGACTTTATGCAATGCATCATGCTATTTTCATACCTAATGAGGGAGTTCAGGAGATTTC 147
          |||
Sbjct 74 CGTGACTTTATGCAATGCATCATGCTATTTTCATACCTAATGAGGGAGTTCAGGAGATTTC 133

Query 148 AACCCAGGAAATGCATGGATCTCAAAGGAAACAAACACCCAATAAACTCGGAGTGGCAGAC 207
          |||
Sbjct 134 AACCCAGGAAATGCATGGATCTCAAAGGAAACAAACACCCAATAAACTCGGAGTGGCAGAC 193

Query 208 TGACAACCTGTGAGACATGCACCTTGCTACGAAACAGAAATTTTCATGTTGCACCCCT 261
          |||
Sbjct 194 TGACAACCTGTGAGACATGCACCTTGCTACGAAACAGAAATTTTCATGTTGCACCCCT 247
    
```

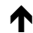

**3' partner: POLE4**

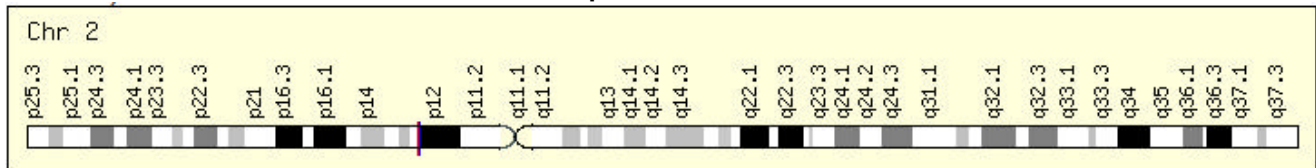

**Junction point**

exon=3 331..372  
/gene="POLE4"  
/gene\_synonym="p12"

**BLAST vs mRNA**



```

Query 5   AGAATGGTGCCTGCTCTGCTCTGCTGCTGCTTCTGGGTCCTGCTGTCCCCAGGAG   64
          |||
Sbjct 99   AGAATGGTGCCTGCTCTGCTCTGCTGCTGCTTCTGGGTCCTGCTGTCCCCAGGAG   158

Query 65   AACCAAGATGGTCGTTACTCTCTGACCTATATCTACACTGGGCTGTCCAAGCATGTTGAA   124
          |||
Sbjct 159   AACCAAGATGGTCGTTACTCTCTGACCTATATCTACACTGGGCTGTCCAAGCATGTTGAA   218

Query 125  GACGTCGCCCGCTTTTCAGGCCCTTGGCTCACTCAATGACCTCCAGTTCTTTAGATACAAC   184
          |||
Sbjct 219   GACGTCGCCCGCTTTTCAGGCCCTTGGCTCACTCAATGACCTCCAGTTCTTTAGATACAAC   278

Query 185  AGTAAAGACAGGAAGTCTCAGCCCATGGGACTCTGGAGACAGGTGGAAGGAATGGAGGAT   244
          |||
Sbjct 279   AGTAAAGACAGGAAGTCTCAGCCCATGGGACTCTGGAGACAGGTGGAAGGAATGGAGGAT   338

Query 245  TGGAAGCAGGACAGCCAACCTCAGAAGGCCAGGGAGGACATCTTTATGGAGACCCTGAAA   304
          |||
Sbjct 339   TGGAAGCAGGACAGCCAACCTCAGAAGGCCAGGGAGGACATCTTTATGGAGACCCTGAAA   398

Query 305  GACATCGTGGAGTATTACAACGACAGTAACGG   336
          |||
Sbjct 399   GACATCGTGGAGTATTACAACGACAGTAACGG   430
    
```

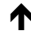

3' partner: GJC3

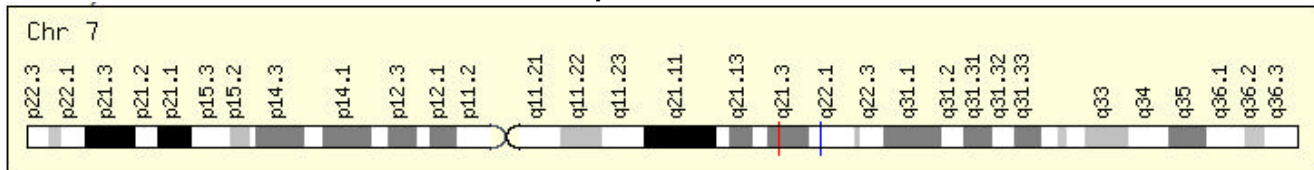

Junction point

```

exon=1 1..781
/gene="GJC3"
/gene_synonym="CX29; CX30.2; CX31.3; GJE1"
    
```

BLAST vs mRNA

```

>ref|NM_181538.2| UniGene info linked to NM_181538.2GEO profiles info linked to NM_181538.2Gene info
linked to NM_181538.2Genome view with mapviewer linked to NM_181538.2 Homo sapiens gap junction
protein, gamma 3, 30.2kDa (GJC3), mRNA
Length=1131
GENE ID: 349149 GJC3 | gap junction protein, gamma 3, 30.2kDa [Homo sapiens]
Score = 1266 bits (685), Expect = 0.0
Identities = 806/857 (95%), Gaps = 37/857 (4%)
    
```

Strand=Plus/Plus

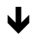

```

Query 337  ATGTGTGGCAGGTTCCCTGCGGGCGGCTGCTGGCGGAGGAGAGCCGGCGCTCCACCCCGTG   396
          |||
Sbjct 1     ATGTGTGGCAGGTTCCCTGCGGGCGGCTGCTGGCGGAGGAGAGCCGGCGCTCCACCCCGTG   60

Query 397  GGGCGCCTCTTGCTTCCCGTGCTCCTGGGATTCGGCCTTGTGCTGGCTGCCAGTGGG   456
          |||
Sbjct 61    GGGCGCCTCTTGCTTCCCGTGCTCCTGGGATTCGGCCTTGTGCTGGCTGCCAGTGGG   120

Query 457  CCTGGAGTCTATGGTGATGAGCAGAGTGAATTCGTGTGTACACCCAGCAGCCGGGCTGC   516
          |||
Sbjct 121   CCTGGAGTCTATGGTGATGAGCAGAGTGAATTCGTGTGTACACCCAGCAGCCGGGCTGC   180

Query 517  AAGGCTGCCTGCTTCGATGCCTTCCACCCCTCTCCCGCTGCGTTTCTGGGTCTTCCAG   576
          |||
Sbjct 181   AAGGCTGCCTGCTTCGATGCCTTCCACCCCTCTCCCGCTGCGTTTCTGGGTCTTCCAG   240

Query 577  GTCATCTTGGTGGCTGTACCCAGCGCCCTCTATATGGGTTTCACTCTGTATCACGTGATC   636
          |||
Sbjct 241   GTCATCTTGGTGGCTGTACCCAGCGCCCTCTATATGGGTTTCACTCTGTATCACGTGATC   300

Query 637  TGGCACTGGGAATTATCAGGAAAGGGGAAGGAGGAGAGATCTCTGATCCAGGGACGGGA   696
          |||
Sbjct 301   TGGCACTGGGAATTATCAGGAAAGGGGAAGGAGGAGAGACC-CTGATCCAGGGACGGGA   359

Query 697  GGGCAACACAGATGTCTTAGGGGCTGGAAGCTCTCACGCTGCTCTGGGCTTATGTGGCT   756
          |||
Sbjct 360   GGGCAACACAGATGTCC-AGGGGCTGGAAGC-CTCAGGCTGCTCTGGGCTTATGTGGCT   417

Query 757  CAGCTGGGGCTCGGCTTGTCTGTAGGGGCGAGCCCTGGGGTTGCAGTACCACCTGTAT   816
          |||
Sbjct 418   CAGCTGGGGCTCGGCTTGTCTGTAGGGGCGAGCCCTGGGGTTGCAGTACCACCTGTAT   477
    
```

```

Query 817 GGGTTCAGATGCCAGCTCCTTTGCATGTCGCCGAGAACCTTGCCTTGGTAGTATAACC 876
          |||
Sbjct 478 GGGTTCAGATGCCAGCTCCTTTGCATGTCGCCGAGAACCTTGCCTTGGTAGTATAACC 537

Query 877 TGCAATCTGTCCCCTCTGAGAAGACCATTTTCCTAAAGACCATGTTGGAGTCAG 936
          |||
Sbjct 538 TGCAATCTGTCCCCTCTGAGAAGACCATTTT-CCTAAAGACCATGTTGGAGTCAG 596

Query 937 CGGTTTCTGTCTCTTGTACTTTTTTGGAGCTTGTGCTTCTGGGTTGGGGAGATGGTG 996
          |||
Sbjct 597 CGGTTTCTGTCTCTTGTACTTTTTTGGAGCTTGTGCTTCTGGGTTGGGGAGATGGTG 656
    
```

### SLC25A16-DNA2

TTGGTACCTTCTTGGCAGACCTTCATCAGACAATCCTAATGTCTTAGTTTTGAAAACCTCATGTAACCTTACTTTGTGGTGGTGTGTGCGAGCAATAGCGC;  
 GACAATATCCTACCCATTTGATGTGACTCGTCGGCGAATGCAATTAGGAACCTGTTCTGCCGGAATTTGAAAAGTGCCTATTTTCAGAAGAAAGTGGTAGCTTC;  
 TTTCCAAGAACAGTTCTGAGCACAGGAATGGATAACCGGTACCTGGTGTGGCAGTCAATACTGTACAGAACAAGAGGGAAACTGTGAAAAGCGCTGGTC;  
 TCACTGCTTCACAGTCACTAGAAAATAAAGAACTATGCATCCTTAGGAATGACTGGTGTCTGTTCCAGTAGAGCCAGGAGATATCATTTCATTTGGAGGGAG;  
 TGCACACTCTGACACTGGATAAATAGATAAAAGATTTTGGATATTTGATCTGTATCCAGACATGCTGATTTCTGGCACCAGCATAGCCAGTAGTATTCGATG;  
 ATGAGAAGAGCTGTCTGAGTAAAACCTTTTAGGAGCTCTGATCCAGCCACACGCCAAATGCTAATTTGGTACGGTTCTCCATGAGGTGTTTCAAAAAGCAATA/  
 ATAATAGCTTTGCCCCAGAAAAGCTACAAGAACTTGCTTTTCAAACAATTCAAGAAATAAGACATTTGAAGGAAATGTACCGCTTAAATCTAAGTCAAGATGA/  
 ATAAAACAAGAAGTAGAGGACTATCTTCTCGTTTGTAAATGGGCAGGAGATTTTCATGCATAAAAAACCTTCGACTGACTTCCCTCAGATGCAGCTCTCT/  
 TGCCAAGTGATAAATAGTAAGGATAATTCAACATGTAACATTGAAGTCGTGAAACCAATGGATATTGAAGAAGCATTGGTCCCCTAAGTTTGGATGAAAGGC/  
 AAATAAATGTTACAGTTGGTGTGAAATACATCGAGGTATAACAATACAGATATGCCGCTGGACTAGACTGCAAGATCAAATTCATGAACACTACGTAGTCAG/  
 GTTCTGTAACCTTACTAGTCAGAGAGAAAAGCTGATCAAGCCTGACTGCTCCCTACTCAGAAGTGTGAGTACCTGGCCTGCACATCTAAATAAAGAATTAAC  
 CTGAACCGAATGCATCCATTGTTTACGATTAGCAAATCGCCTCTTTCCGGGACACT

#### 5' partner: SLC25A16

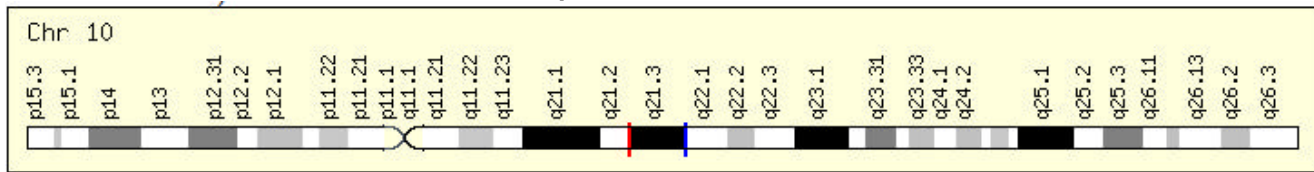

#### Junction point

exon=8 922..990  
 /gene="SLC25A16"  
 /gene\_synonym="D10S105E; GDA; GDC; HGT.1; hML7; MGC39851; ML7"

#### BLAST vs mRNA

>ref[NM\_152707.3] Homo sapiens solute carrier family 25 (mitochondrial carrier; Graves disease autoantigen), member 16 (SLC25A16), nuclear gene encoding mitochondrial protein, mRNA  
 Length=2264  
 GENE ID: 8034 SLC25A16 solute carrier family 25 (mitochondrial carrier; Graves disease autoantigen), member 16 [Homo sapiens]  
 Score = 327 bits (177), Expect = 3e-88  
 Identities = 177/177 (100%), Gaps = 0/177 (0%)

Strand=Plus/Plus

```

Query 5 TACCCTTCTTGGCAGACCTTCATCAGACAATCCTAATGTCTTAGTTTTGAAAACCTCATGT 64
          |||
Sbjct 814 TACCCTTCTTGGCAGACCTTCATCAGACAATCCTAATGTCTTAGTTTTGAAAACCTCATGT 873

Query 65 AAACCTTACTTTGTGGTGGTGTGCTGGAGCAATAGCGCAGACAATATCCTACCCATTTGA 124
          |||
Sbjct 874 AAACCTTACTTTGTGGTGGTGTGCTGGAGCAATAGCGCAGACAATATCCTACCCATTTGA 933

Query 125 TGTGACTCGTCGGCGAATGCAATTAGGAACTGTTCTGCCGGAATTTGAAAAGTGCCT 181
          |||
Sbjct 934 TGTGACTCGTCGGCGAATGCAATTAGGAACTGTTCTGCCGGAATTTGAAAAGTGCCT 990
    
```

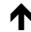

#### 3' partner: DNA2L

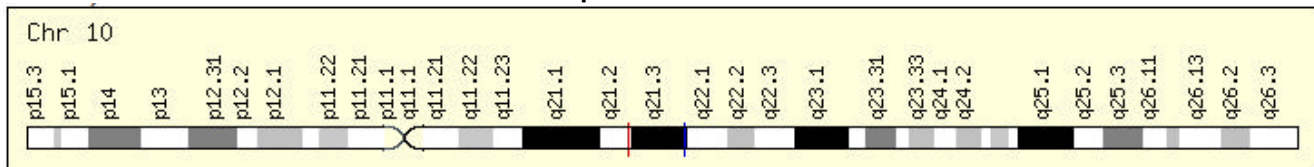

exon=2 184..366  
 /gene="DNA2"  
 /gene\_synonym="DNA2L; FLJ10063; KIAA0083; MGC133297"

**BLAST vs mRNA**

>ref|NM\_001080449.2| Gene info linked to NM\_001080449.2 Homo sapiens DNA replication helicase 2 homolog (yeast) (DNA2), mRNA  
 Length=4287  
 GENE ID: 1763 DNA2 | DNA replication helicase 2 homolog (yeast) [Homo sapiens]  
 Score = 1496 bits (810), Expect = 0.0  
 Identities = 933/984 (95%), Gaps = 41/984 (4%)

Strand=Plus/Plus

↓

```

Query 180 CTATTTTCAGAAAGTGGTAGCTTCCTTTCCAAGAACAGTTCTGAGCACAGGAATGGAT 239
      |||
Sbjct 182 CTATTTTCAGAAAGTGGTAGCTTCCTTTCCAAGAACAGTTCTGAGCACAGGAATGGAT 241

Query 240 AACCGGTACCTGGTGTGGCAGTCAATACTGTACAGAACAAGAGGAACTGTGAAAAG 299
      |||
Sbjct 242 AACCGGTACCTGGTGTGGCAGTCAATACTGTACAGAACAAGAGGAACTGTGAAAAG 301

Query 300 CGCCTGGTCATCACTGCTTCACAGTCACTAGAAAATAAAGAACTATGCATCCTTAGGAAT 359
      |||
Sbjct 302 CGCCTGGTCATCACTGCTTCACAGTCACTAGAAAATAAAGAACTATGCATCCTTAGGAAT 361

Query 360 GACTGGTGTTCGTTCAGTAGAGCCAGGAGATATCATTCAATTTGGAGGAGACTGCACA 419
      |||
Sbjct 362 GACTGGTGTTCGTTCAGTAGAGCCAGGAGATATCATTCAATTTGGAGGAGACTGCACA 421

Query 420 TCTGACACTTGGATAATAGATAAAGATTTTGGATATTTGATTCTGTATCCAGACATGCTG 479
      |||
Sbjct 422 TCTGACACTTGGATAATAGATAAAGATTTTGGATATTTGATTCTGTATCCAGACATGCTG 481

Query 480 ATTTCTGGCACCAGCATAGCCAGTAGTATTTCGATGTATGAGAAGAGCTGTCTGAGTGAA 539
      |||
Sbjct 482 ATTTCTGGCACCAGCATAGCCAGTAGTATTTCGATGTATGAGAAGAGCTGTCTGAGTGAA 541

Query 540 ACTTTTAGGAGCTCTGATCCAGCCACACGCCAAATGCTAATTGGTACGGTTCTCCATGAG 599
      |||
Sbjct 542 ACTTTTAGGAGCTCTGATCCAGCCACACGCCAAATGCTAATTGGTACGGTTCTCCATGAG 601

Query 600 GTGTTTCAAAAAGCAATAAATAATAGCTTTGCCCCAGAAAAGCTACAAGAACTTGCTTTT 659
      |||
Sbjct 602 GTGTTTCAAAAAGCCATAAATAATAGCTTTGCCCCAGAAAAGCTACAAGAACTTGCTTTT 661

Query 660 CAACAATTCAGAA-TAAGACATTTGAAGGAAATGTACCGCTTAAATCTAAGTCAAGAT 718
      |||
Sbjct 662 CAACAATTCAGAAATAAGACATTTGAAGGAAATGTACCGCTTAAATCTAAGTCAAGAT 721

Query 719 GAAATAAAACAAGAAGTAGAGGACTATCTTCCTTCGTTTGTAAATGGCAGGAGATTTTC 778
      |||
Sbjct 722 GAAATAAAACAAGAAGTAGAGGACTATCTTCCTTCGTTTGTAAATGGCAGGAGATTTTC 781

Query 779 ATGCATAAAAACACTTCGACTGACTTCCCTCAGATGCAGCTCTCTTGCCAAGTGATAAT 838
      |||
Sbjct 782 ATGCATAAAAACACTTCGACTGACTTCCCTCAGATGCAGCTCTCTTGCCAAGTGATAAT 841
  
```

**PACRGL-LIMCH1**

CCCCAACGCAGGCGCTCGGTGGCGGTAGCCGCGGTTGTTGGCCGACCGAGTGCCGGTCATAAGCCCCCCCCGGTGGGGGGCAGCTGGTGTGCGGATCGCGG;  
 GGGAGAGAGGCGCGGTAGGAACGGGTCCCCGGAGCCGTGAACCGCGGTACAGGAGTGAAGGGAAGCAATGCAAAAATCAAAGGGCTCTGGAGGTACACAG;  
 TGAAAAACAGAGCAACAGGTAACATGATCAAAGGACATCATCAAGCACACAGTTAAAAACACAGGAATGCAGTTTCAGGGAAGCAAATCCTCATTGTCAACCA;  
 TTCTCCAAAGTCTGCAAGAAAACCTTATCTCTAAACCAAGTGATAAATGAACCTAAAAACAATTAATCCGGAGCACCCAGCATGTTTGACATGCGGTGTGAGG;  
 GGAGGCCGCGGTGCAGCCGCACAGCAGGGCCCGCCAGGAGCAGCTGCAGCTGATAAATAACCAGCTGAGGGAAGAGGACGACAAATGGCAAGATGACCTGGC;  
 CGTTGGAAGAGTCGTAGAAGAAGTGTCTCAGGACTTAATCAAGAAAGAGGAAGAAAGGAAAAAAATGGAGAAGTTACTGGCTGGAGAAAGATGGGACAAG;  
 GAACGAAGGAAAAGCATCA

**5' partner: PACRGL**

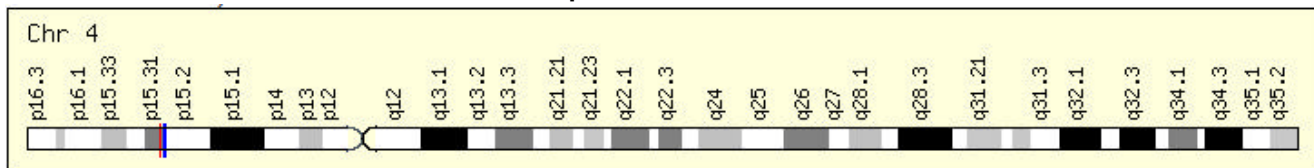

Junction point  
 exon=3 444..598  
 /gene="PACRGL"

/gene\_synonym="C4orf28; MGC29898"

**BLAST vs mRNA**

>ref|NM\_001130727.1| UniGene info linked to NM\_001130727.1GEO profiles info linked to NM\_001130727.1  
 Gene info linked to NM\_001130727.1Genome view with mapviewer linked to NM\_001130727.1 Homo sapiens  
 PARK2 co-regulated-like (PACRGL), transcript variant 2, mRNA  
 Length=1796  
 GENE ID: 133015 PACRGL | PARK2 co-regulated-like [Homo sapiens]  
 Score = 394 bits (213), Expect = 1e-108  
 Identities = 221/225 (99%), Gaps = 0/225 (0%)

Strand=Plus/Plus

```

Query 156 GGAGTGAAAGGGAAGCAATGCAAAAATCAAAGGGCTCTGGAGGTACACAGTTGAAAAACA 215
          |||
Sbjct 375 GGAGTGAAAGGGAAGCAATGCAGAAATCAGAGGGCTCTGGAGGTACACAGTTGAAAAACA 434

Query 216 GAGCAACAGGTAACATGATCAAAGGACATCATCAAGCACACAGTTAAAACACAGGAATG 275
          |||
Sbjct 435 GAGCAACAGGTAACATGATCAAAGGACATCATCAAGCACACAGTTAAAACACAGGAATG 494

Query 276 CAGTTCAGGGAAGCAAAATCCTCATTGTCAACCAAGTCTCCAAAGTCTGCAAGAAAACTTC 335
          |||
Sbjct 495 CAGTTCAGGGAAGCAAAATCCTCATTGTCAACCAAGTCTCCAGAGTCTGCAAGAAAACTTC 554

Query 336 ATCCTAAACCAAGTGATAAACTGAACCTAAAACAATTAATCCGG 380
          |||
Sbjct 555 ATCCTAGACCAAGTGATAAACTGAACCTAAAACAATTAATCCGG 599
  
```



**3' partner: LIMCH1**

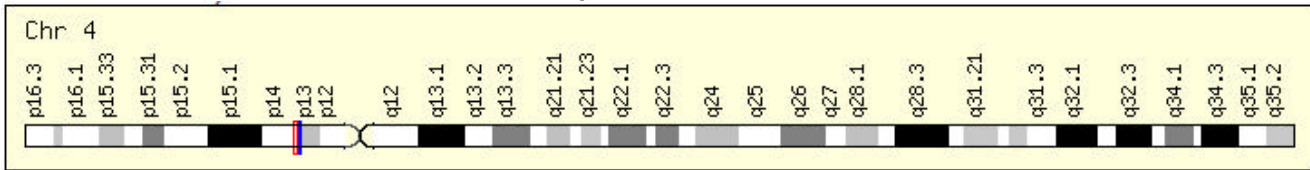

**Junction point**

exon=11 647..773  
 /gene="LIMCH1"  
 /gene\_synonym="DKFZp434I0312; DKFZp686A01247;

**BLAST vs mRNA**

>ref|NM\_001112720.1| UniGene info linked to NM\_001112720.1GEO profiles info linked to NM\_001112720.1  
 Gene info linked to NM\_001112720.1Genome view with mapviewer linked to NM\_001112720.1  
 Homo sapiens LIM and calponin homology domains 1 (LIMCH1), transcript variant 5, mRNA  
 Length=5722  
 GENE ID: 22998 LIMCH1 | LIM and calponin homology domains 1 [Homo sapiens]  
 Score = 472 bits (255), Expect = 7e-132  
 Identities = 258/259 (99%), Gaps = 1/259 (0%)

Strand=Plus/Plus

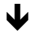

```

Query 379 GGAGCACCAGCATGTTTGACATGCGGTGTGAGGAGGAGGCCGCGGTGCAGCCGCACAGCA 438
          |||
Sbjct 646 GGAGCACCAGCATGTTTGACATGCGGTGTGAGGAGGAGGCCGCGGTGCAGCCGCACAGCA 705

Query 439 GGGCCCCCAGGAGCAGCTGCAGCTGATAAATAACCAAGTCTGAGGGAAGAGGACGACAAAT 498
          |||
Sbjct 706 GGGCCCCCAGGAGCAGCTGCAGCTGATAAATAACCAAGTCTGAGGGAAGAGGACGACAAAT 765

Query 499 GGCAAGATGACCTGGCTCGTTGGAAGAGTCGTAGAAGAAGTGTCTCAGGACTTAATCA 558
          |||
Sbjct 766 GGCAAGATGACCTGGCTCGTTGGAAGAGTCGTAGAAGAAGTGTCTCAGGACTTAATCA 825

Query 559 AGAAAGAGGAAAGAAAGGAAAAATGGAGAAGTACTGGCTGGAGAAAGATGGGACAAGT 618
          |||
Sbjct 826 AGAAAGAGGAAAGAAAGGAAAAATGGAGAAGTACTGGCTGGAGAA-GATGGGACAAGT 884

Query 619 GAACGAAGGAAAAGCATCA 637
          |||
Sbjct 885 GAACGAAGGAAAAGCATCA 903
  
```



## TXNL1-CDH2

TTGGCTTAGAAAATGACCTCTGAGAAGCAATGAGGACACAGATATTCAAAAGGCTATATGGATTAATGCCTTTTATTAACAAAGCTGGTTGTGAATGTCT' AATGAAAGTGTAGCATGGATTTGACAACCTGTTTACGAAAAGACACAACCTTCTTGAATCTGACTGTGATGAACAGCTGCTTATTACTGTGGCATTCAAT' AACCTGTTAAGCTTTATCCATGAAATTTCAAGGGCCAGATAATGGTCAGGGCCCTAAATATGTAAAAATTTTATCAACCTACCCCGATCTATGGATTTTG; AGAGGCAGAAAAGAAGTGAACCAACTCAAGCTCTGGAACCTGACAGAGGATGATATTTAAAGAAGATGGCATTGTTCCACTTCGTTATGTTAAGTTTCAGAATGT' AACAGTGTAACTATATTTGTTTCAGTCAATCAAGGTGAAGAGGAAACAACAAGAATTTTCATATTTTACTTTTATTGGTACTCCAGTCCAGGCAACAAATATG; ATGACTTCAAACGAAAAGTGAACAGTATACGTTAATAAATCAAGCTACAGACATGGAAGGCAATCCCACATATGGCCTTTCAAACACAGCCACGGCCGTCAT' CACAGTGACAGATGTCAATGACAATCCTCCAGAGTTTACTGCCATGACGTTTTATGGTGAAGTTCCTGAGAACAGGGTAGACATCATAGTAGCTAATCTAAC' GTGACCGATAAGATCAACCCCATACACCAGCCTGGAACGCAGTGTACAGAATCAGTGGCGGAGATCCTACTGGACGGTTCGCCATCCAGACCCGACCCAAACA( CAACGACGGGTTAGTCACCGTGGTCAAACAATCGACTTTGAAACAAATAGGATGTTGTCTTACTGTTTGTCTGCCGAAAAATCAAGTGCCATTAGCCAAGG( AATTGACACCCCGCTCAGTCAACTGCAACCGTGTCTGTTACAGTTATTGACGTAATGAAAACCCCTTATTTTGCCCCCAATCCTAAGATCATTGCCCAGAA( AAGCTTCATGCGCTCCATGTTGAAAAATCACTGGCTCAGACCGAATTCGATATATGCAGGCAAAAATTTAGAAACCCTTAATTTATCTGGATCCTGGCC( TGGCTAAATTGAGTTCCTGTGAATGACAAAATACCTATACATGTGCCTGTTTTTGTGAGACA

### 5' partner: TXNL1

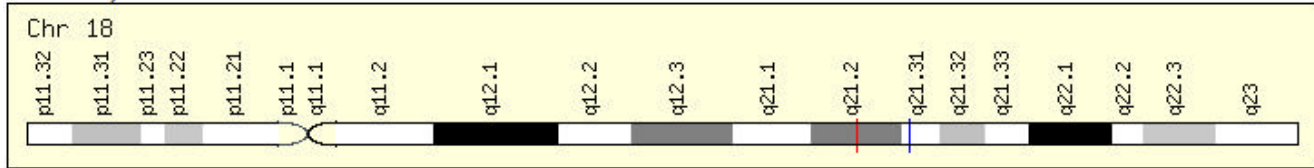

### Junction point

exon=8 1090..1194  
 /gene="TXNL1"  
 /gene\_synonym="TRP32; Tx1; TXL-1; TXNL"

### BLAST vs mRNA

>ref|NR\_024546.1| Gene info linked to NR\_024546.1 Genome view with mapviewer linked to NR\_024546.1 Homo sapiens thioredoxin-like 1 (TXNL1), transcript variant 2, non-coding RNA  
 Length=1434  
 GENE ID: 9352 TXNL1 | thioredoxin-like 1 [Homo sapiens]  
 Score = 957 bits (518), Expect = 0.0  
 Identities = 523/525 (99%), Gaps = 2/525 (0%)

Strand=Plus/Plus

```

Query 5      CTTAGAAAATGACCTCTGAGAAGCAATGAGGACACAGATATTCAAAAGGCTATATGGAT 64
Sbjct 672     CTTAGAAAATGACC-CTG-GAAGCAATGAGGACACAGATATTCAAAAGGCTATATGGAT 729

Query 65     TTAATGCCTTTTATTAACAAAGCTGGTTGTGAATGCTTAATGAAAGTGTAGCATGGA 124
Sbjct 730     TTAATGCCTTTTATTAACAAAGCTGGTTGTGAATGCTTAATGAAAGTGTAGCATGGA 789

Query 125    TTTGACAACCTGTTTACGAAAAGACACAACCTTCTTGAATCTGACTGTGATGAACAGCTG 184
Sbjct 790     TTTGACAACCTGTTTACGAAAAGACACAACCTTCTTGAATCTGACTGTGATGAACAGCTG 849

Query 185    CTTATTACTGTGGCATTCAATCAACCTGTTAAGCTTTATTCCATGAAATTTCAAGGGCCA 244
Sbjct 850     CTTATTACTGTGGCATTCAATCAACCTGTTAAGCTTTATTCCATGAAATTTCAAGGGCCA 909

Query 245    GATAATGGTCAGGGCCCTAAATATGTA AAAATTTTATCAACCTACCCCGATCTATGGAT 304
Sbjct 910     GATAATGGTCAGGGCCCTAAATATGTA AAAATTTTATCAACCTACCCCGATCTATGGAT 969

Query 305    TTTGAAGAGGCAGAAAAGAAGTGAACCAACTCAAGCTCTGGAACCTGACAGAGGATGATATT 364
Sbjct 970     TTTGAAGAGGCAGAAAAGAAGTGAACCAACTCAAGCTCTGGAACCTGACAGAGGATGATATT 1029

Query 365    AAAGAAGATGGCATTGTTCCACTTCGTTATGTTAAGTTTCAGAATGTTAACAGTGAACCT 424
Sbjct 1030    AAAGAAGATGGCATTGTTCCACTTCGTTATGTTAAGTTTCAGAATGTTAACAGTGAACCT 1089

Query 425    ATATTTGTTTCAGTCAATCAAGGTGAAGAGGAAACAACAAGAATTTTCATATTTACTTTT 484
Sbjct 1090    ATATTTGTTTCAGTCAATCAAGGTGAAGAGGAAACAACAAGAATTTTCATATTTACTTTT 1149

Query 485    ATTGGTACTCCAGTCCAGGCAACAAATATGAATGACTTCAAACGA 529
Sbjct 1150    ATTGGTACTCCAGTCCAGGCAACAAATATGAATGACTTCAAACGA 1194
    
```

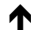

3' partner: CDH2

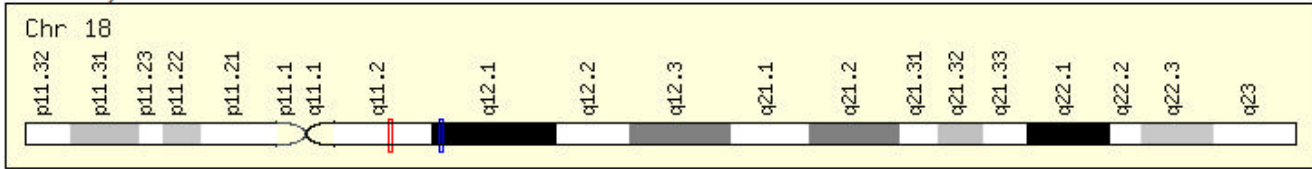

Junction point

exon=8 1480..1617  
 /gene="CDH2"  
 /gene\_synonym="CD325; CDHN; CDw325; NCAD"

BLAST vs mRNA

>ref|NM\_001792.3| UniGene info linked to NM\_001792.3GEO profiles info linked to NM\_001792.3Gene info linked to NM\_001792.3Genome view with mapviewer linked to NM\_001792.3 Homo sapiens cadherin 2, type 1, N-cadherin (neuronal) (CDH2), mRNA  
 Length=4380  
 GENE ID: 1000 CDH2 | cadherin 2, type 1, N-cadherin (neuronal) [Homo sapiens]  
 Score = 1000 bits (541), Expect = 0.0  
 Identities = 634/673 (95%), Gaps = 29/673 (4%)

Strand=Plus/Plus

↓

```

Query 529  AAAAGTGCAACAGTATACGTTAATAATTCAAGCTACAGACATGGAAGGCAATCCCACATA 588
          |||
Sbjct 1479  AAAAGTGCAACAGTATACGTTAATAATTCAAGCTACAGACATGGAAGGCAATCCCACATA 1538
Query 589  TGGCCTTTCAAACACAGCCACGGCCGTCATCACAGTGACAGATGTCAATGACAATCCTCC 648
          |||
Sbjct 1539  TGGCCTTTCAAACACAGCCACGGCCGTCATCACAGTGACAGATGTCAATGACAATCCTCC 1598
Query 649  AGAGTTTACTGCCATGACGTTTTTATGGTGAAGTTCCTGAGAACAGGGTAGACATCATAGT 708
          |||
Sbjct 1599  AGAGTTTACTGCCATGACGTTTTTATGGTGAAGTTCCTGAGAACAGGGTAGACATCATAGT 1658
Query 709  AGCTAATCTAACTGTGACCGATAA-GATCAACCCCATACACCAGCCTGGAAACGCAAGTGT 767
          |||
Sbjct 1659  AGCTAATCTAACTGTGACCGATAAAGGATCAACCCCATACACCAGCCTGGAAACGCAAGTGT 1718
Query 768  CAGAATCAGTGGCGGAGATCCTACTGGACGGTTCGCCATCCAGACCCGACCCAAACAGCAA 827
          |||
Sbjct 1719  CAGAATCAGTGGCGGAGATCCTACTGGACGGTTCGCCATCCAGACCCGACCCAAACAGCAA 1778
Query 828  CGACGGGTTAGTCACCGTGGTCAAAC-AATCGACTTTGAAACAAATAGGATGTTTGTCTCT 886
          |||
Sbjct 1779  CGACGGGTTAGTCACCGTGGTCAAACCAATCGACTTTGAAACAAATAGGATGTTTGTCTCT 1838
Query 887  TACTGTTTGTCTGCCGAAAAATCAAGTGCCATTAGCCAAGGGAATTCAGCACCCGCCCTCAG 946
          |||
Sbjct 1839  TACTGTT-GCTGCAGAAAA-TCAAGTGCCATTAGCCAAGGGAATTCAGCACCCGCCCTCAG 1896
Query 947  TCAACTGCAACCGTGTCTGTTACAGTTATTGACGTAATGAAAACCCCTTATTTTGCCCCC 1006
          |||
Sbjct 1897  TCAACTGCAACCGTGTCTGTTACAGTTATTGACGTAATGAAAACCCCTTATTTTGCCCCC 1956
    
```

EEF1G-AHNAK

TTGGGGCCAGTTTGTGCTAAAAAGTTGCAGAGACCCAACTAAAAAGGACACACCACGGAAAGAGAAGGGTTACGGGAAGAGAAGCAGAAGCCCCAGGC'  
 GAGCGGAAGGAGGAGAAAAAGGCGCTGCCCTGCTCCTGAGGAGGAGATGGATGAATGTGAGCAGGCGCTGGCTGCTGAGCCCAAGGCCAAGGACCCCTTC'  
 CTCACCTGCCAAGAGGACTGTAGAAGCGGCCAGGAAGAAAACCACCCCTTTTAAAGTTGTTTTGTGACCGTTTTTTGGAGCATTGTTCTAAAAATGGGA/  
 ATTACATATTGCTGTGCCAAGGGCAACAAACACCTGCAGTTAAAGGAATACCTTCCGCGAGGCGGCTTTTCGGAGCATGCATGTTTATAGCTCCAGCCAGGC/  
 AGACCGAGGCTGCTGCATAAGCCCTGCTTGGTGCAATTTCTTACTTGAAGGGACAGAGTGTGGGCTTAGGTTTGGGACTAGAGGGGGCTTTGGCAACTA/  
 GGTGCTCAGGTGATTATCCTTTCGCTCGTTTTATCCAATAAACATTATCAAGC

5' partner: EEF1G

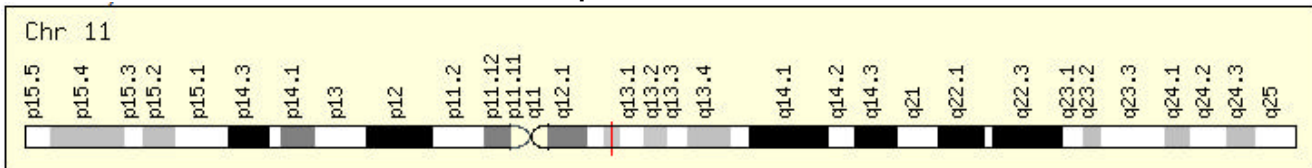

Junction point

exon=7 799..1003

```
/gene="EEF1G"
/gene_synonym="EF1G; GIG35"
```

**BLAST vs mRNA**

```
>ref|NM_001404.4| UniGene info linked to NM_001404.4GEO profiles info linked to NM_001404.4Gene info
linked to NM_001404.4Genome view with mapviewer linked to NM_001404.4 Homo sapiens eukaryotic
translation elongation factor 1 gamma (EEF1G), mRNA
Length=1552
GENE ID: 1937 EEF1G | eukaryotic translation elongation factor 1 gamma [Homo sapiens]
Score = 398 bits (215), Expect = 1e-109
Identities = 218/219 (99%), Gaps = 1/219 (0%)
```

Strand=Plus/Plus

```
Query 5   GGCCCAGTTTGTATGCTAAAAAG-TTGCAGAGACCCAACCTAAAAAGGACACACCACGGAA 63
      |||
Sbjct 785  GGCCCAGTTTGTATGCTAAAAAGTTTGCAGAGACCCAACCTAAAAAGGACACACCACGGAA 844

Query 64  AGAGAAGGTTTACGGGAAGAGAAGCAGAAGCCCCAGGCTGAGCGGAAGGAGAGAAAAA 123
      |||
Sbjct 845  AGAGAAGGTTTACGGGAAGAGAAGCAGAAGCCCCAGGCTGAGCGGAAGGAGAGAAAAA 904

Query 124  GCGCGTGCCTGCTCCTGAGGAGGAGATGGATGAATGTGAGCAGGCGCTGGCTGCTGA 183
      |||
Sbjct 905  GCGCGTGCCTGCTCCTGAGGAGGAGATGGATGAATGTGAGCAGGCGCTGGCTGCTGA 964

Query 184  GCCCAAGGCCAAGGACCCCTTCGCTCACCTGCCCAAGAG 222
      |||
Sbjct 965  GCCCAAGGCCAAGGACCCCTTCGCTCACCTGCCCAAGAG 1003
```

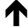

**3' partner: AHNAK**

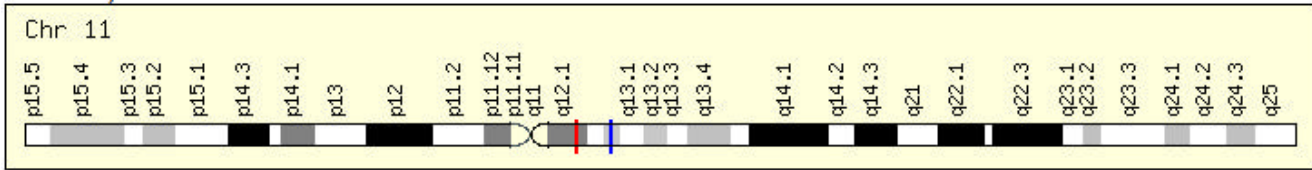

**Junction point**

```
exon=7 743..1090
/gene="AHNAK"
/gene_synonym="AHNAKRS; MGC5395"
```

**BLAST vs mRNA**

```
>ref|NM_024060.2| UniGene info linked to NM_024060.2GEO profiles info linked to NM_024060.2Gene info
linked to NM_024060.2Genome view with mapviewer linked to NM_024060.2 Homo sapiens AHNAK nucleoprotein
(AHNAK), transcript variant 2, mRNA
Length=1108
GENE ID: 79026 AHNAK | AHNAK nucleoprotein [Homo sapiens]
Score = 630 bits (341), Expect = 9e-180
Identities = 345/347 (99%), Gaps = 0/347 (0%)
```

Strand=Plus/Plus

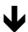

```
Query 221  AGGACTGTAGAAGCGGCCAGGAAGAAAACCACCCCTTTTAAGGTTGTTTTGTGACCGT 280
      |||
Sbjct 741  AGGACTGTAGAAGCGGCCAGGAAGAAAACCACCCCTTTTAAGGTTGTTTTGTGACCGT 800

Query 281  TTTTGGAGCATTGTTCTAAAAATGGGAAATTACATATTGCTGTGCCAAGGGCAACAAAC 340
      |||
Sbjct 801  TCTTTGGAGCATTGTTCTAAAAATGGGAAATTACATATTGCTGTGCCAAGGGCAACAAAC 860

Query 341  ACCTGCAGTTAAAGGAATACCTTCCGCGAGGCGGCTTTTCGGAGCATGCATGTTTATAGC 400
      |||
Sbjct 861  ACCTGCAGTTAAAGGAATACCTTCCGCGAGGCGGCTTTTCGGAGCATGCATGTTTATAGC 920

Query 401  TCCAGCCAGGCCAGACCGAGGGCTGCTGCATAAGCCCTGCTTGGTGCATTTCTTACTTG 460
      |||
Sbjct 921  TCCAGCCAGGCCAGACCGAGGGCTGCTGCATAAGCCCTGCTTGGTGCATTTCTTACTTG 980

Query 461  CAAGGGGACAGAGTGTGGGCTTAGGTTTGGGACTAGAGGGGGCTTTGGCAACTATGGTGC 520
      |||
Sbjct 981  CAAGGGGACAGAGTGTGGGCTTAGGTTTGGGACTAGAGGGGGCTTTGGCAACTATGGTGC 1040
```

```

Query 521 TCAGGTGATTATCCTTCGCTCGTTTATCCAATAAACATTTATCAAGC 567
          |||
Sbjct 1041 TCAGGTGATTATCCTTCGCTCGTTTATCCAATAAACATTTATCAAGC 1087
    
```

**MBD1-CCDC11**

TGGTGCCTGGCTGCCCTAGCAAGGCAGTAGACCCAGGCCCTGCCTTCTGTGAAGCAAGAGCACTGACCCAGAGGAGGACAAGGAGGAGAACAAGGATGATTCTCCTCCAAATTGGCCCCAGAGGAAGAGGCAGGAGGGGCTGGCACACCCGTGATCACGGAGATTTTCAGCCTGGGTGGAACCCCGTTCCGAGATACAGCAGTCTGTGCCAAGAGATCCAAGCCTCCTAAAGGCCAAGGAGCTGAGCACCATCTAGAAAGATCCGACGCAGCCATCAGAAGCATAATGCTATTTTGGCTTCCATTAGTCAAGTGAGCGGGATCGCTTGAAGGCTGAGTGGGACCAGCACAAATGACTGCAAGATTTTGGACAGCCTTGTGCGAGCAAGAATCAAGGATGCTGTGCAAGGTTTATCATTAACATTGAAGAAAAGACGAAATAAGTAAGGCTCACAAACCTGGGACATAAACCATGAAATATTCCTAAAACCACAATTTGAGATTGACCAGTCAAAATCAAATTTAGCAAGGATCATGGCTGAGATATTTATATTAATCCATAGCTATTGCTGGTTAATATTTTAAATATTTTATTTGTGATAGCCTGTATTTGATGAAAAACAATATATTGTTTCATATTTTCATT

**5' partner: MBD1**

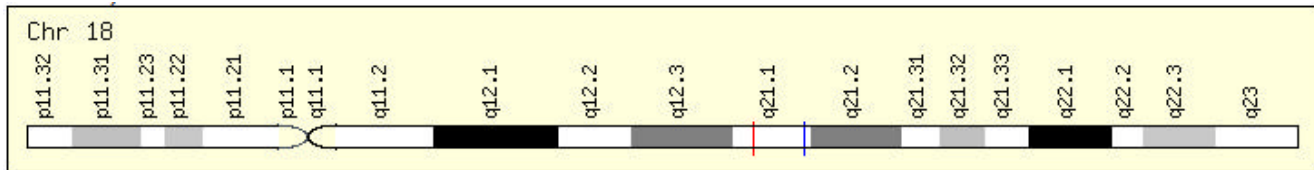

**Junction point**  
**exon=16** 2004..2065  
 /gene="MBD1"  
 /gene\_synonym="CXXC3; PCM1; RFT"

**BLAST vs mRNA**

```

>ref|NM_001204141.1| Gene info linked to NM_001204141.1 Homo sapiens methyl-CpG binding domain protein 1 (MBD1), transcript variant 10, mRNA
Length=2860
GENE ID: 4152 MBD1 | methyl-CpG binding domain protein 1 [Homo sapiens]
Score = 388 bits (210), Expect = 7e-107
Identities = 215/217 (99%), Gaps = 2/217 (0%)
    
```

Strand=Plus/Plus

```

Query 1 TGGTGCCTGGCTGCCCTAGCAAGGCAGTAGACCCAGGCCCTGCCTTCTGTGAAGCAAGAG- 59
Sbjct 1849 TGGTGCCTGGCTGCCCTAGCAAGGCAGTAGACCCAGGCCCTGCCTTCTGTGAAGCAAGAGC 1908

Query 60 CA-CTGACCCAGAGGAGGACAAGGAGGAGAACAAGGATGATTCTGCCTCCAAATTGGCCCC 118
Sbjct 1909 CACCTGACCCAGAGGAGGACAAGGAGGAGAACAAGGATGATTCTGCCTCCAAATTGGCCCC 1968

Query 119 CAGAGGAAGAGGCAGGAGGGGCTGGCACACCCGTGATCACGGAGATTTTCAGCCTGGGTG 178
Sbjct 1969 CAGAGGAAGAGGCAGGAGGGGCTGGCACACCCGTGATCACGGAGATTTTCAGCCTGGGTG 2028

Query 179 GAACCCGCTTCCGAGATACAGCAGTCTGGTTGCCAAG 215
Sbjct 2029 GAACCCGCTTCCGAGATACAGCAGTCTGGTTGCCAAG 2065
    
```

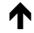

**3' partner: CCDC11**

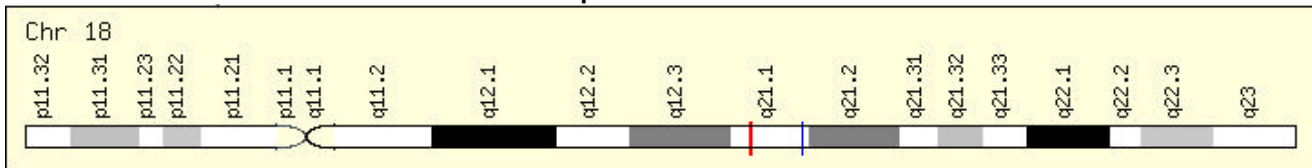

**Junction point**  
**exon=2** 161..390  
 /gene="CCDC11"  
 /gene\_synonym="FLJ32743"

**BLAST vs mRNA**

```
>ref|NM_145020.3| UniGene info linked to NM_145020.3GEO profiles info linked to NM_145020.3Gene info
linked to NM_145020.3Genome view with mapviewer linked to NM_145020.3 Homo sapiens coiled-coil domain
containing 11 (CCDC11), mRNA
Length=1837
GENE ID: 220136 CCDC11 | coiled-coil domain containing 11 [Homo sapiens]
Score = 429 bits (232), Expect = 4e-119
Identities = 232/232 (100%), Gaps = 0/232 (0%)
```

Strand=Plus/Plus

```

      ↓
Query  215  GAGATCCAAGCCTCCTAAAGGCCAAGGAGCTGAGCACCATCTAGAAAGAATCCGACGCAG  274
      |||
Sbjct  160  GAGATCCAAGCCTCCTAAAGGCCAAGGAGCTGAGCACCATCTAGAAAGAATCCGACGCAG  219

Query  275  CCATCAGAAGCATAATGCTATTTTGGCTTCCATTAAGTCAAGTGAGCGGGATCGCTTGAA  334
      |||
Sbjct  220  CCATCAGAAGCATAATGCTATTTTGGCTTCCATTAAGTCAAGTGAGCGGGATCGCTTGAA  279

Query  335  AGCTGAGTGGGACCAGCAATGACTGCAAGATTTTGGACAGCCTTGTGCGAGCAAGAAT  394
      |||
Sbjct  280  AGCTGAGTGGGACCAGCAATGACTGCAAGATTTTGGACAGCCTTGTGCGAGCAAGAAT  339

Query  395  CAAGGATGCTGTGCAAGGGTTTATCATTAAACATTGAAGAAAGACGAAATAAG  446
      |||
Sbjct  340  CAAGGATGCTGTGCAAGGGTTTATCATTAAACATTGAAGAAAGACGAAATAAG  391
```

### CORO7-MAGMAS

```
TTGGGGCGCTAATGGGCAGCCCTGGCTTCTCAGCCTGCAGCCTCCTGACATGAGCCCAGTGAGCCAAGCCCCCGAGAGGGCCCTGCTCGTGGGCCCCATC(
TCAGCGCAGTACCTGGAAGAAAAGTCTGACCAGCAAAGAAGGAGGAGCTGCTGAAATGCCATGGTGGCAAACCTGGGGAACCGGGAGGACCCACTCCCCAG(
ACTCCTTTGAAGGCGTGGACGAGGACGAGTGGGCCAAGTACCTGGCCAGATCATTGTGATGGGCGTGCAGGTGGTGGGCAGGGCCCTTTGCACGGGCCTTGC(
GCAGGAGTTTGCAGCCAGCCGGGCCGAGCTGATGCCGAGGACGCGCTGGACACCCGGTCTGCAGCCGCTTCCAACCTCTCCGGCCTCAGCCTCCAGGAGGC(
CAGCAGATTCTCAACGTGTCCAAGCTGAGCTCTGAGGAGGTCCAGAAGACTATGAACACTTATTTAACGTGAATGATAAATCCGTGGGTGGCTCCTTCTACC(
GCAGTCAAAGGTGGTCCGCGCAAAGGAGCGCCTGGATGAGGAACCTAAAATCCAGGCCAGGAGACAGAGAAAAGGCAGATGCCTCATACGTGACTGCTCG(
TCCCCCGCCACCCGCGCCTCTAATTAATAGCTGTAATAATCTTTTCTGCACGTAAAAAAGCCACTTTCTGTACAAGTTGGCATAAAAAGAAGCATGCTTTCA(
TGTGCACGAACGCTCAACGTCAATAATCGTATGCCATCCGCTGATCCTAAGACGATAATGCCACGTTTCGGACCTGCCGTTCCATCTAAGTTCCTTGCAA(
AAAATCTCTGAACATACGTCGCAAAACAGTGATATACGGTTAGCATACCGAAGCTGAGGCGATATCCAGACGATATGGAAGTCA
```

### 5' partner: CORO7

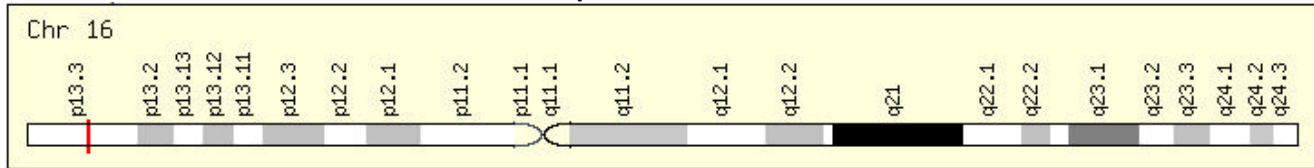

### Junction point

```
exon=27 2874..2960
/gene="CORO7"
/gene_synonym="0610011B16Rik; CRN7; FLJ22021; FLJ44188; POD1"
```

### BLAST vs mRNA

```
>ref|NM_001201473.1| Gene info linked to NM_001201473.1 Homo sapiens coronin 7 (CORO7), transcript
variant 3, mRNA
Length=3599
GENE ID: 79585 CORO7 | coronin 7 [Homo sapiens]
Score = 435 bits (235), Expect = 1e-120
Identities = 235/235 (100%), Gaps = 0/235 (0%)
```

Strand=Plus/Plus

```

Query  5  GCGCCTAATGGGCAGCCCTGGCTTCTCAGCCTGCAGCCTCCTGACATGAGCCCAGTGAGC  64
      |||
Sbjct  2727  GCGCCTAATGGGCAGCCCTGGCTTCTCAGCCTGCAGCCTCCTGACATGAGCCCAGTGAGC  2786

Query  65  CAAGCCCCCGAGAGGCCCTGCTCGTGGGCCCCATCCTCAGCGCAGTACCTGGAAGAA  124
      |||
Sbjct  2787  CAAGCCCCCGAGAGGCCCTGCTCGTGGGCCCCATCCTCAGCGCAGTACCTGGAAGAA  2846

Query  125  AAGTCTGACCAGCAAAAAGAAGGAGGAGTCTGCTGAATGCCATGGTGGCAAACTGGGGAAC  184
      |||
Sbjct  2847  AAGTCTGACCAGCAAAAAGAAGGAGGAGTCTGCTGAATGCCATGGTGGCAAACTGGGGAAC  2906

Query  185  CGGGAGGACCCACTCCCCAGGACTCCTTTGAAGCGTGGACGAGGACGAGTGGG  239
      |||
Sbjct  2907  CGGGAGGACCCACTCCCCAGGACTCCTTTGAAGCGTGGACGAGGACGAGTGGG  2961
```

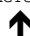

3' partner: MAGMAS

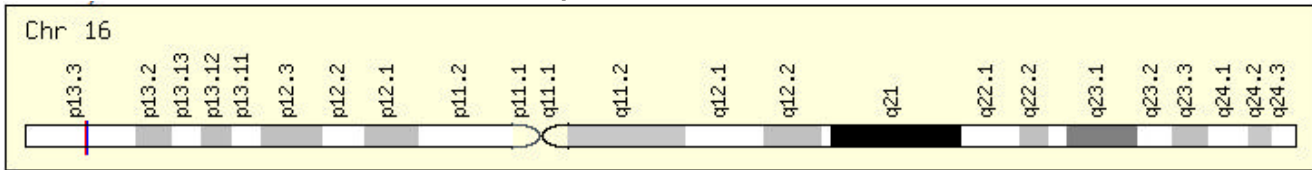

**Junction point**  
**exon=2** 142..226  
 /gene="PAM16"  
 /gene\_synonym="CGI-136; MAGMAS; TIM16; TIMM16"

**BLAST vs mRNA**

>ref|NM\_016069.9| Gene info linked to NM\_016069.9 Homo sapiens presequence translocase-associated motor 16 homolog (S. cerevisiae) (PAM16), nuclear gene encoding mitochondrial protein, mRNA  
 Length=600  
 GENE ID: 51025 PAM16 | presequence translocase-associated motor 16 homolog (S. cerevisiae) [Homo sapiens]  
 Score = 721 bits (390), Expect = 0.0  
 Identities = 428/444 (97%), Gaps = 12/444 (2%)

Strand=Plus/Plus

↓

```

Query 238  GGCCAAGTACCTGGCCAGATCATTGTGATGGGCGTGCAGGTGGTGGGCAGGGCCTTTGC 297
          |||
Sbjct 141  GGCCAAGTACCTGGCCAGATCATTGTGATGGGCGTGCAGGTGGTGGGCAGGGCCTTTGC 200

Query 298  ACGGGCCTTGCAGGAGTTTGCAGCCAGCCGGCCGAGCTGATGCCGAGGACGCGC 357
          |||
Sbjct 201  ACGGGCCTTGCAGGAGTTTGCAGCCAGCCGGCCGAGCTGATGCCGAGGACGCGC 260

Query 358  TGGACACCGGTCTGCAGCCGCTTCCAACCTCTCCGGCCTCAGCCTCCAGGAGGCACAGCA 417
          |||
Sbjct 261  TGGACACCGGTCTGCAGCCGCTTCCAACCTCTCCGGCCTCAGCCTCCAGGAGGCACAGCA 320

Query 418  GATTCTCAACGTGTCCAAGCTGAGCTCTGAGGAGTCCAGAAGA-CTATGAACACTTATT 476
          |||
Sbjct 321  GATTCTCAACGTGTCCAAGCTGAGCCTGAGGAGTCCAGAAGA-CTATGAACACTTATT 380

Query 477  TAACGTGAATGATAAATCCGTGGGTGGCTCCTTCTACCTGCAGTCAAAGTGGTCCGCGC 536
          |||
Sbjct 381  TAAGGTGAATGATAAATCCGTGGGTGGCTCCTTCTACCTGCAGTCAAAGTGGTCCGCGC 440

Query 537  AAAGGAGCGCCTGGATGAGGAACATAAATCCAGGCCAGGAG-ACAGAGAAAAGG-CA 594
          |||
Sbjct 441  AAAGGAGCGCCTGGATGAGGAACATAAATCCAGGCCAGGAGGACAGAGAAAAGGGCA 500

Query 595  GATGCCATACAGTACTGCTCG-CTCCCC-GCC-ACCC-GC-GCCTTAATTAATAGC 649
          |||
Sbjct 501  GATGCCATACAGTACTGCTCGGCTCCCCCGCCACCCGCGCCTTAATTTATAGC 560

Query 650  T-G-TAATAA-TT-CTTTTCTGCA 669
          |||
Sbjct 561  TTGGTAATAAATTTCTTTTCTGCA 584
  
```

**TYMP-SCO2**

TTGGCGCTCTGGTGGTGGACGTTAAGTTCGGAGGGGCGCGCTTCTCCCAACCAGGAGCAGGCCCGGGAGCTGGCAAAGACGCTGGTTGGCGTGGGAGCCA(
 CCTAGGGCTTCGGGTCGCGGACGCGCTGACCGCCATGGACAAGCCCCTGGGTCGCTGCGTGGGCCACGCCCTGGAGGTGGAGGAGCGCTGCTCTGCATGGA(
 GGCGCAGGCCCGCCAGACTTAAGGGACCTGGTCACCACGCTCGGGGGCGCCCTGCTCTGGCTCAGCGGACACGCGGGGACTCAGGCCAGGGCGCTGCCGG(
 TGGCCGCGGCGCTGGACGACGGCTCGGCCCTTGGCCGCTTCGAGCGGATGCTGGCGGCGCAGGGCGTGGATCCCGGTCTGGCCGAGCCCTGTGCTCGGGAA(
 TCCCGCAGAACGCCCGCAGCTGCTGCCTCGCGCCCGGGAGCAGGAGGAGCTGCTGGCGCCCGCAGATGGAGCATCAGATCCATGCTGCTGCTGACTCGGAGC(
 CCACAGCTTGGCACAGGCTCTCTCAGCTCAAGCCTCCGGTCTCCTTGGGACCTGGGAGGCCAGGCCCTGCATCTGAGGTCTGGCTTTTGTCAAGGCAGG(
 CCTGCAGAGACAGGTGGGCAGGGCCAGCCCCAGGGCCCTGGGCTTCGAACCCGCTGCTGATCACAGGCCTGTTTCGGGGCTGGACTCGGTGGGGCTGGCT(
 GCCCTGAGGGCTGAGAAGGAGAGGCTGCAGCAGCAAAAAGCGAACAGAAAGCCCTGCGCCGGGCGAGCTGTGGGCCAGGGGCGACTTCCACCTGCTGGATCACA(
 ATGCCCGGCTCGCTGCCAGGCTGACTTCCCGGGGCCAGTGGGTGCTGATGTACTTTGGCTTCCCTCCACTGCCCTACATCTGCCCAAAACAAACTGGAAA(
 AGCTTGGTGAAGGTGGTGGCGGCGAGCTGGGAATACAAAGCCTGGTTTTGCCTCCAATGCAAGCCTGTCTTTTCATCCATGTGAAACCAGAGCCGGGAACAAA(
 TTGAAATCATGGCCCCGCATACCTCAGGAAACTTCCACCCAAACTGGTTGGGGTTCTGATACC

## 5' partner: TYMP

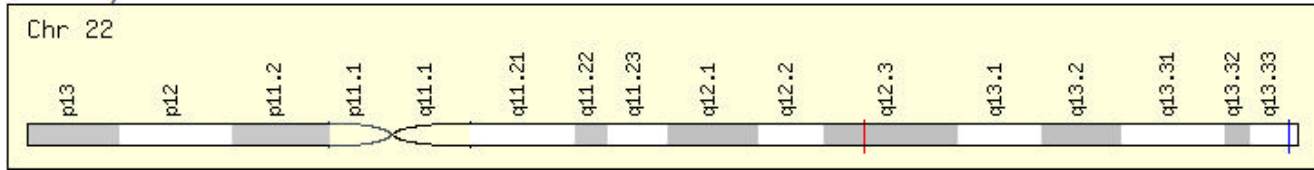

## Junction point

exon=8 1049..1279

/gene="TYMP"

/gene\_synonym="ECGF; ECGF1; hPD-ECGF; MEDPS1; MNGIE; MTDPS1; PDECGF; TP"

## BLAST vs mRNA

>ref|NM\_001113756.1| Homo sapiens thymidine phosphorylase (TYMP), transcript variant 3, mRNA  
Length=1587

GENE ID: 1890 TYMP| thymidine phosphorylase [Homo sapiens]

Score = 881 bits (477), Expect = 0.0

Identities = 477/477 (100%), Gaps = 0/477 (0%)

Strand=Plus/Plus

```

Query 5      CGCTCTGGTGGTGGACGTTAAGTTCGGAGGGGCCCGCTCTTCCCAACCCAGGAGCAGGC 64
            |||
Sbjct 804    CGCTCTGGTGGTGGACGTTAAGTTCGGAGGGGCCCGCTCTTCCCAACCCAGGAGCAGGC 863

Query 65     CCGGGAGCTGGCAAAGACGCTGGTTGGCGTGGGAGCCAGCCATAGGGCTTCGGGTGCGCGC 124
            |||
Sbjct 864    CCGGGAGCTGGCAAAGACGCTGGTTGGCGTGGGAGCCAGCCATAGGGCTTCGGGTGCGCGC 923

Query 125    AGCGCTGACCCGCATGGACAAGCCCTGGGTGCGTGCCTGGGCCACGCCCTGGAGGTGGA 184
            |||
Sbjct 924    AGCGCTGACCCGCATGGACAAGCCCTGGGTGCGTGCCTGGGCCACGCCCTGGAGGTGGA 983

Query 185    GGAGGCGCTGCTCTGCATGGACGGCGCAGGCCCGCCAGACTTAAGGGACCTGGTCAACCAC 244
            |||
Sbjct 984    GGAGGCGCTGCTCTGCATGGACGGCGCAGGCCCGCCAGACTTAAGGGACCTGGTCAACCAC 1043

Query 245    GCTCGGGGGCCGCCCTGCTCTGGCTCAGCGGACACGCGGGGACTCAGGCCACGGGCGTGC 304
            |||
Sbjct 1044   GCTCGGGGGCCGCCCTGCTCTGGCTCAGCGGACACGCGGGGACTCAGGCCACGGGCGTGC 1103

Query 305    CCGGTGGCCCGCGCGCTGGACGACGGCTCGGCCCTTGGCCGCTTCGAGCGGATGCTGGC 364
            |||
Sbjct 1104   CCGGTGGCCCGCGCGCTGGACGACGGCTCGGCCCTTGGCCGCTTCGAGCGGATGCTGGC 1163

Query 365    GGCGCAGGCGCTGGATCCCGGCTGGCCCGAGCCCTGTGCTCGGGAAGTCCCGCAGAACG 424
            |||
Sbjct 1164   GGCGCAGGCGCTGGATCCCGGCTGGCCCGAGCCCTGTGCTCGGGAAGTCCCGCAGAACG 1223

Query 425    CCGGCAGCTGCTGCTCGCCCGGGAGCAGGAGGAGTGTGCGCCCGCAGATGG 481
            |||
Sbjct 1224   CCGGCAGCTGCTGCTCGCCCGGGAGCAGGAGGAGTGTGCGCCCGCAGATGG 1280

```

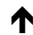

## 3' partner: SCO2

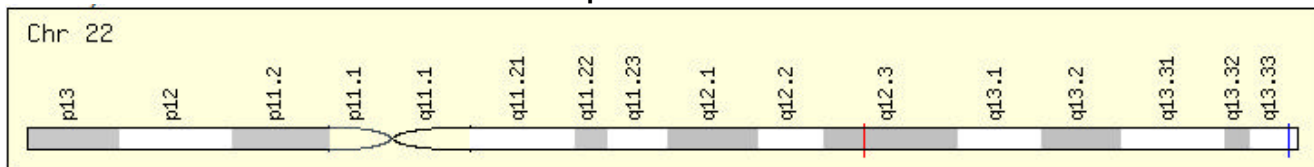

## Junction point

exon=2 146..1002

/gene="SCO2"

/gene\_synonym="MGC125823; MGC125825; SCO1L"

## BLAST vs mRNA

>ref|NM\_001169110.1| Homo sapiens SCO cytochrome oxidase deficient homolog 2 (yeast) (SCO2), nuclear gene encoding mitochondrial protein, transcript variant 3, mRNA

Length=1002

GENE ID: 9997 SCO2| SCO cytochrome oxidase deficient homolog 2 (yeast) [Homo sapiens]

Score = 828 bits (448), Expect = 0.0

Identities = 560/609 (92%), Gaps = 28/609 (4%)

Strand=Plus/Plus

```

      ↓
Query  479  TGGAGCATCAGATCCATGCTGCTGCTGACTCGGAGCCCCACAGCTTGGCACAGGCTCTCT  538
          |||
Sbjct  144  TGGAGCATCAGATCCATGCTGCTGCTGACTCGGAGCCCCACAGCTTGGCACAGGCTCTCT  203

Query  539  CAGCTCAAGCCTCCGGTCCTCCCTGGGACCTGGGAGGCCAGGCCCTGCATCTGAGTCC  598
          |||
Sbjct  204  CAGCTCAAGCCTCCGGTCCTCCCTGGGACCTGGGAGGCCAGGCCCTGCATCTGAGTCC  263

Query  599  TGGCTTTTGTCAAGGCAGGGCCCTGCAGAGACAGGTGGCCAGGGCCAGCCCAGGGCCCT  658
          |||
Sbjct  264  TGGCTTTTGTCAAGGCAGGGCCCTGCAGAGACAGGTGGCCAGGGCCAGCCCAGGGCCCT  323

Query  659  GGGCTTCGAACCCGGCTGCTGATCACAGGCCTGTTCCGGGCTGGACTCGGTGGGGCTGG  718
          |||
Sbjct  324  GGGCTTCGAACCCGGCTGCTGATCACAGGCCTGTTCCGGGCTGGACTCGGTGGGGCTGG  383

Query  719  CTGGCCCTGAGGGTGAGAAGGAGAGGCTGCAGCAGCAAAAAGCGAACAGAAGCCCTGCG  778
          |||
Sbjct  384  CTGGCCCTGAGGGTGAGAAGGAGAGGCTGCAGCAGCAAAA-GCGAACAGAAGCCCTGCG  442

Query  779  CCGGGCAGCTGTGGGCCAGGGCGACTTCCACCTGCTGGATCACAGATGCCCGGGCTCGC  838
          |||
Sbjct  443  CCAGGCAGCTGTGGGCCAGGG-CGACTTCCACCTGCTGGATCACAGAGGCC-GGGCTCGC  500

Query  839  TGCCAGGCTGACTTCCCGGGCCAGTGGGTGCTGATGTACTTTGGCTTCCCTCCACTGCC  898
          |||
Sbjct  501  TGCAAGGCTGACTTCC-GGGGCCAGTGGGTGCTGATGTACTTTGGCTTCCACTC-ACTGCC  558

Query  899  CCT-ACATCTGCCAAAACAACTGGAAAAGCTTGGTGAAGGTGGTCCGGGCAGCTGG  957
          |||
Sbjct  559  C-TGACATCTGCCAGA-CGAGCTGGAGAA-GCT-GGTGCA-GGTGGTCCGG-CAGCTGG  612
    
```

**PPCS-LOC100507214**

GCACGAGGCCGCTTCCCACCCAGACTTGGCTGTCCGCTCTCGGCCCTTCGGGCCAGCCCTTTCGGGCTTGTCTGAGCCTGGAGGCCGAGGAGAATGCACCTT/CGGGTTTTGCTGAGGCTCTGAGGAGCTACCAGGAGGCTGCGGCTGCAGGCACCTTCTTGGCAGTAGAGTTCCACCCTTTGGCGGACTATTTGCATCTGTTGC/GGCTGCGGCCAGGCACTCAATCCGCTAGGCCCTTCTGCGATGTTTTACCTGGCTGCGGCTGTGTGAGATTTCTATGTTCTCTGTCTCTGAAATGCCTGAACA/AAGATCCAGTCACTTGGGGGCCCACTGCAGGAAAAGTTCAAGTTAGAAGACATACTTCACCATCTTGAAAAAGAAGAAATCAATCCCCTTGCTACTACAGAA/AAACACTCTGTTTGGTGCTTATTCAGCCAGCACAGTGAAGACAGGCTGAGGACTGCTACCACAGATGTAGAAGAGCTTATAGTGAAGCACATGGGTGAAAC/AAAGAAGTGAGAACTAATAGCATAGAATTTAAAGACACCTGTGATTTTGTTCATTGCCCTTCATTAATAATTAACATATTAACAACTAATGTTTGGCTATCAC/GTATAGTTTGAAGC

**5' partner: PPCS**

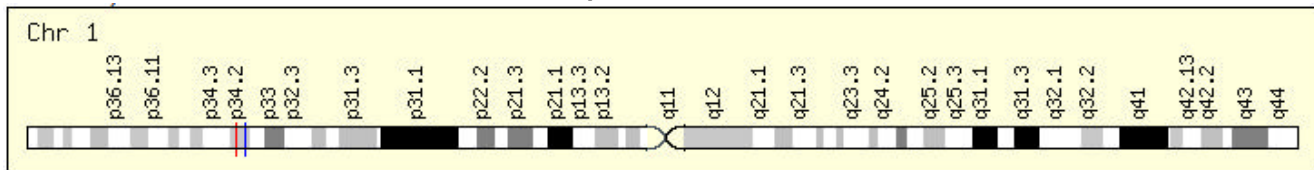

**Junction point**

exon=2 573..676  
 /gene="PPCS"  
 /gene\_synonym="FLJ11838; MGC117357; MGC138220;  
 RP11-163G10.1"

**BLAST vs mRNA**

```

>ref|NM_024664.2| Homo sapiens phosphopantothenoylcysteine synthetase (PPCS), transcript variant 1, mRNA
Length=1489
GENE ID: 79717 PPCS| phosphopantothenoylcysteine synthetase [Homo sapiens]
Score = 612 bits (331), Expect = 4e-174
Identities = 331/331 (100%), Gaps = 0/331 (0%)
    
```

Strand=Plus/Plus

```

Query  9  CCGCTTCCCACCCAGACTTGGCTGTCCGCTCTCGGCCCTTCGGGCCAGCCCTTTCGGG  68
          |||
Sbjct  346  CCGCTTCCCACCCAGACTTGGCTGTCCGCTCTCGGCCCTTCGGGCCAGCCCTTTCGGG  405

Query  69  CTTGCTGAGCCTGGAGGCCGAGGAGAATGCACCTTCCGGGTTTTGCTGAGGCTCTGAGGAG  128
          |||
Sbjct  406  CTTGCTGAGCCTGGAGGCCGAGGAGAATGCACCTTCCGGGTTTTGCTGAGGCTCTGAGGAG  465

Query  129  CTACCAGGAGGCTGCGGCTGCAGGCACCTTCTGGCAGTAGAGTTCCACCCTTTGGCGGA  188
          |||
Sbjct  466  CTACCAGGAGGCTGCGGCTGCAGGCACCTTCTGGCAGTAGAGTTCCACCCTTTGGCGGA  525
    
```



```

Query 189 CTATTTGCATCTGTTGCAGGCTGCGGCCAGGCACTCAATCCGCTAGGCCCTTCTGCGAT 248
          |||
Sbjct 526 CTATTTGCATCTGTTGCAGGCTGCGGCCAGGCACTCAATCCGCTAGGCCCTTCTGCGAT 585

Query 249 GTTTTACCTGGCTGCGGCTGTGTCAGATTTCTATGTTCTCTGCTCTGAAATGCCTGAACA 308
          |||
Sbjct 586 GTTTTACCTGGCTGCGGCTGTGTCAGATTTCTATGTTCTCTGCTCTGAAATGCCTGAACA 645

Query 309 CAAGATCCAGTCATCTGGGGGCCACTGCAG 339
          |||
Sbjct 646 CAAGATCCAGTCATCTGGGGGCCACTGCAG 676
    
```

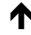

3' partner: LOC100507214

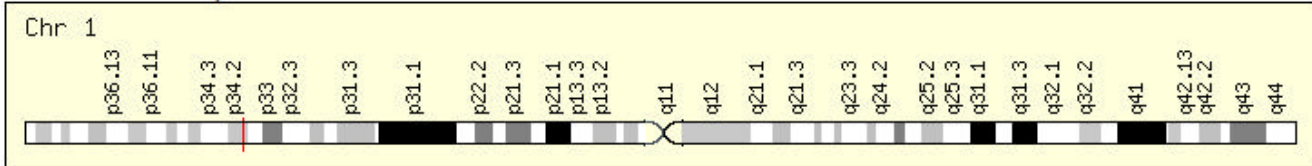

BLAST vs mRNA

```

>ref|XR_113349.1| PREDICTED: Homo sapiens hypothetical LOC100507214 (LOC100507214), partial miscRNA
Length=668
GENE ID: 100507214 LOC100507214| hypothetical LOC100507214 [Homo sapiens]
Score = 544 bits (294), Expect = 1e-153
Identities = 296/297 (99%), Gaps = 0/297 (0%)
Strand=Plus/Plus
    
```

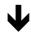

```

Query 338 AGGGAAAAGTTCAGTTAGAAGACATACTTCACCATCTTGAAAAAGAAGAAATCAATCCCC 397
          |||
Sbjct 371 AGGGAAAAGTTCAGTTAGAAGACATACTTCACCATCTTGAAAAAGAAGAAATCAATCCCC 430

Query 398 TTGCTACTACAGAAGAACAACCTCTGTTTGGTGCTTATTCAGCCAGCACAGTGAAGACAG 457
          |||
Sbjct 431 TTGCTACTACAGAAGAACAACCTCTGTTTGGTGCTTATTCAGCCAGCACAGTGAAGACAG 490

Query 458 GCTGAGGACTGCTACCACAGATGTAGAAGAGCTTATAGTGAAGCACATGGGTGAAACAAA 517
          |||
Sbjct 491 GCTGAGGACTGCTACCACAGATGTAGAAGAGCTTATAGTGAAGCACATGGGTGAAACAAA 550

Query 518 AGAAGTGAGAACTAATAGCATAGAAATTTAAAGACACCTGTGATTTTGTTCATTGCCCTT 577
          |||
Sbjct 551 AGAAGTGAGAACTAATAGCATAGAAATTTAAAGACACCTGTGATTTTGTTCATTGCCCTT 610

Query 578 CATTAAATTAACATATTAATAAATAATGTTTGGCTATCACTGTATAGTTTGAAAAGC 634
          |||
Sbjct 611 CATTAAATTAACATATTAATAAATAATGTTTGGCTATCACTGTATAGTTTGAAAAGC 667
    
```

RMND5A-ANAPC1

TTGGCGTGAAAACAAAACAATCGGCCGCGCCGTCGCAGGCACCCGAACGTCGCGAGCGGGGCCCTGGGGACGCGGGGCCGAGTGCAGCGAGCGAACGGGAGC;  
CGCGGACTCGCCAGGGGGCTAGGGCGCCATGGGGCAGCGGGCTCCGGCTGCGCGGGGCTCCCCGGCGCCGGCTAGTGCGCCCGCCGCTCGGCCGCC;  
CAGCTCCCGCGCCCGCCTTGGGGAACGAGGAGCAGGACGCGGCCCTCGCGGGGCCCGGGCCGAACGGCTGCGGACACCTGGGGCCGAGGAGCCGAGCG;  
CGCCGCTCCGGCATGGATCAGTGCCTGACGGTGGAGCGCGAGCTGGAGAAGGTGCTGCACAAGTTCTCGGGCTACGGGCAGCTGTGCGAGCGCGCCCTGGA;  
GAGCTCATCGACTACACCGGGTCTCAAGCACAGATCCTGCAGAGCCACGGCCAAGATGCTGAATTATCAGGGACACTTCACTTGTTTTGACACAGTGC;  
GTAAAAGAATAAAGGATACTGTTCAAAAATTGGCCTCCGACCACAAAGACATCCACAGCAGTGTCTCGGGTTGGAAAAGCCATTGATAAGGATTCACTTT;  
AGAGATTTGGAAACTTCCCTTTGGAAATTGCTTCCCATCAGAGATGCAATTTATCACTGTGTAACAGCTGCTCAGACTGGCCAGAAGCTGTCTGT;  
TCTTGATTGGACGTCAGGATCTTTCCAAGCAGGCCCTGCGAAGGAACTTACTCAAAGGAGTCTATGTTTCCTTCAGAACAGAACTGAGAGGAAGATGACGGC;  
TGAATGACATGAATCAGAGTCAATGATTAATATGGAGTGAGATTTATGTGCAGGTGTGCGAAGGCTTCTTCAGAGTGCAGTCTGTCCGTGTCTGTAGT;  
CAGTACCCGAGCTCATGACCACGAGTCACTCGAAGGAAAGGAATCGATGCCTCAATGGGTACGACTATGCTTTCGTAGACAGGAGTTACTGATCGTACATC;  
GTTACAGCATGCATCTAATTGAACTGACTGCAGTCCCGGAACCAAGTGAAGTCTCAATGGAACCCGTCACCTTCAAG

5' partner: RMND5A

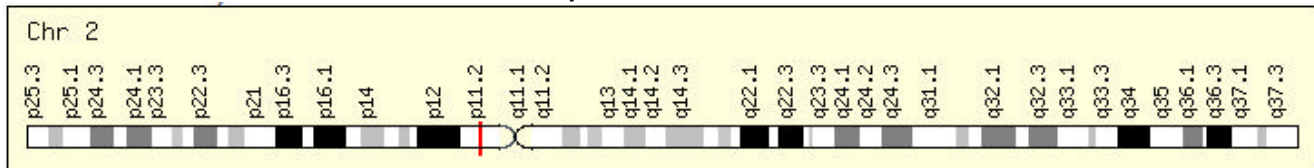

**Junction point**  
 exon=2 520..662  
 /gene="RMND5A"
